# Supplementary material for: The Study to Understand the Genetics of the Acute Response to Metformin and Glipizide in Humans (SUGAR-MGH): Design of a pharmacogenetic Resource for Type 2 Diabetes
Source: PLoS One. 2015 Mar 26;10(3):e0121553. doi: 10.1371/journal.pone.0121553 (PMC4374872; doi:10.1371/journal.pone.0121553)
Supplement: S3 File — (XLSX) [file pone.0121553.s013.xlsx]

## Sheet: SUGAR-MGH Data
De-identified #	Race	Hispanic	Age	Sex	Height (cm)	Weight (kg)	BMI (kg/m2)	Received Glipizide	Glipizide challenge end (mins)	Glucose_v1_baseline (mmol/L)	Glucose_v1_30min (mol/L)	Glucose_v1_60min (mmol/L)	Glucose_v1_90min (mmol/L)	Glucose_v1_120min (mmol/L)	Glucose_v1_180min (mmol/L)	Glucose_v1_240min (mmol/L)	Insulin_v1_baseline (pmol/L)	Insulin_v1_30min (pmol/L)	Insulin_v1_60min (pmol/L)	Insulin_v1_90min (pmol/L)	Insulin_v1_120min (pmol/L)	Insulin_v1_180min (pmol/L)	Insulin_v1_240min (pmol/L)	peak_v1_insulin (pmol/L)	time_peak_v1_insulin (min)	proinsulin_v1_baseline (pmol/L)	glucagon_v1_baseline (ng/L)	glucagon_v1_60min (ng/L)	glucagon_v1_120min (ng/L)	glucagon_v1_180min (ng/L)	glucagon_v1_240min (ng/L)	trough_v1_glucose (mmol/L)	time of trough glucose_v1 (min)	HOMA_v1 (mmol*pmol/L*L)	Glucose_v2_baseline (mmol/L)	Glucose_v2_30min (mmol/L)	Glucose_v2_60min (mmol/L)	Glucose_v2_120min (mmol/L)	Insulin_v2_baseline (pmol/L)	Insulin_v2_30min (pmol/L)	Insulin_v2_60min (pmol/L)	Insulin_v2_120min (pmol/L)	Number of metformin pills taken (out of 4)	V2 glucose AUC	V2 glucose AUC adjust	proinsulin_v2_baseline (pmol/L)	glucagon_v2_baseline (ng/L)	HOMA_v2 (mmol*pmol/L*L)	rs11708067
1	White	No	69.5894	Female	161.9	67	25.5612	Yes	90	4.6065	4.7175	3.2745	2.22				31.38	40.8	120.36	69.42	36.3	33.42	22.62	120.36	60		100					2.8305	120	6.42453	5.0505	7.9365	8.991	6.9375	119.34	760.02	1167.78	252.6	4	656.842	50.7825		110	26.7879	A A
2	Black	No	54.8185	Male	180.6	98.1	30.0769	Yes	240	7.326	6.993	5.4945	4.107	3.2745	3.885	4.8285	26.82	31.32	29.58	74.64	59.16	30.72	21	74.64	90	22	28	30	30	22	41	2.22	90	8.73259	7.3815	10.212	11.8215	9.3795	102.06	113.46	559.62	529.5	4	875.79	0	39	29	33.4825	G A
3	White	No	59.2839	Female	162.8	77.2	29.1279	Yes	240	6.66	6.7155	6.4935	6.2715	5.661	3.9405	3.2745	77.22	93.6	116.76	94.8	131.28	96.84	65.64	131.28	120	16	38	36	70	76	49	2.775	240	22.8571	4.7175	6.9375	7.3815	6.771	36.54	215.76	384.3	224.46	4	592.74	26.64	15	30	7.66122	A A
4	White	No	51.3003	Female	166.3	102.3	36.9906	Yes	240	4.3845	4.329	3.996	2.7195	2.1645	3.33	3.4965	11.52	18.12	27.84	12.24	12.12	25.38	48.96	48.96	240		24	24	29			2.997	120	2.24486	5.8275	8.6025	11.655	12.0435	38.7	240.84	225.78	229.02	4	881.618	182.318		32	10.0233	G A
5	White	No	60.4092	Female	157.8	55.2	22.1679	Yes	240	6.2715	6.66	6.216	5.883	5.439	4.7175	4.1625	19.32	13.98	28.98	86.52	45.54	14.58	10.38	86.52	90	28.2								5.38513	5.217	7.992	10.8225	6.771		468	636	444	4	683.482	57.4425				A A
6	White	No	51.75	Male	179.5	69.7	21.6324	Yes	60	4.2735	4.6065	3.441					18.96	14.46	15.96	36.72	32.16	18.18	14.16	36.72	90							2.775	60	3.60114									N/A						A A
7	White	No	59.566	Male	167.4	94.8	33.8296	Yes	240	6.2715	6.0495	5.9385	4.995	4.329	3.3855	3.996	69.96	54.48	84.72	87.12	139.62	125.58	73.32	139.62	120							3.108	120	19.5002	4.773	8.103	8.88	5.106	32.16	122.88	253.86	96.6	4	601.065	28.305			6.82221	A A
8	White	No	61.3291	Female	172.9	75.7	25.3225	Yes	240	5.883	5.661	3.0525	2.7195	3.6075	3.774	4.0515	9.42	1.86	29.16	84.48	97.68			97.68	120	9.6	20	14	32	22	18	2.6085	120	2.46302	4.773	6.327	7.1595	6.0495	18.6	144	258	186	4	550.283	0	8.5	25	3.94568	G A
9	White	No	45.7477	Male	176	99.3	32.0571	Yes	240	5.1615	5.0505	4.329	3.2745	2.997	3.441	3.3855	46.8	36.6	48.6	120	84	72	54	120	90	66	33	37	35	45		4.0515	180	10.7359	5.883	7.104	8.658	8.658	35.16	193.38	94.74	144.3	4	690.975	0	44	20	9.19317	G G
10	White	No	41.6051	Female	167.7	73	25.9571	Yes	240	4.218	4.44	4.329	3.441	2.775	3.219	3.33	41.16	35.82	56.4								24	34	77	62	44	2.886	90	7.71613	4.884	6.9375	6.3825	6.1605	12.54	105.36	84.72	54.12	4	561.938	0		26	2.72202	A A
11	Black	No	44.6499	Male	192.3	78.6	21.2551	Yes	60	5.106	4.995	3.33					21.42	20.88	20.1	76.38	52.98	20.16	13.86	76.38	90	5.7	14	15	27	31		3.108	180	4.86091									N/A						A A
12	White	No	36.0117	Female	173.9	106	35.0515	No	0	3.774							26.1	68.34	437.7	246.6	279.42	212.64	65.64	437.7	60	7.8	11	10	29	18	19	2.775	120	4.37784	4.1625	5.8275	6.549	6.6045	41.4	390	354	156	4	533.632	34.1325	12	21	7.659	A A
13	White	No	58.2161	Male	187.9	114.3	32.3737	Yes	240	5.9385	5.661	4.7175	3.3855	2.997	3.552	3.7185	34.38	79.26	279.54					279.54	60							3.4965	120	9.07403	5.4945	8.325	10.2675	7.9365	12.78	120.36	140.1	82.02	4	724.275	64.935			3.12088	A A
14	Asian	No	33.77	Male	161.5	57.8	22.1607	Yes	240	4.773	4.6065	3.219	2.997	3.441	3.996	4.3845	34.56	101.04	181.8					181.8	60	4.5	26	18	17	46	28	2.8305	90	7.33133	5.0505	6.7155	7.6035	6.4935	13.44	57.66	154.62	99.6	4	586.08	0	5	14	3.01683	A A
15	White	No	48.2994	Female	162.6	58.8	22.2401	Yes	240	4.8285	4.9395	2.886	2.7195	3.0525	3.4965	4.0515	32.94	35.04	44.16	60.78	29.28	54.18	34.68	60.78	90							2.553	90	7.06892	5.2725	8.658	6.8265	4.995	60.48	48.3	33.24	19.14	1	591.075	0			14.1725	G A
16	Black	No	51.36	Male	183.8	93	27.5291	Yes	240	4.4955	4.3845	4.107	2.997	2.664	3.1635	3.6075	14.88	65.1	250.62					250.62	60	3.6	12	5	5	5	5	2.4975	90	2.97302	4.8285	6.771	8.9355	6.105	14.4	228	432	762	4	592.74	13.32	3.2	29	3.09024	A A
17	Black	No	63.54	Female	162.8	99.7	37.6172	Yes	120	4.6065	4.8285	4.329	3.552	2.3865						303.54		50.7	49.38			25	14	12	14	5	14	2.9415	120		5.0505				44.4				4			18	5	9.96632
18	White	No	58.2352	Male	182.5	124.6	37.4104	Yes	240	5.439	5.439	4.995	4.662	4.4955	3.4965	4.107	56.88	17.58	43.74	50.16	77.04	31.98	140.28	140.28	240	20	41	42	36	42	36	3.1635	90	13.7498	5.9385	8.436	10.4895	9.546	21	50.4	79.74	189.66	4	785.88	73.26	24		5.5426	A A
19	Black	No	63.09	Male	173.8	66.4	21.9821	Yes	180	6.216	6.0495	5.772	5.328	4.9395	2.886		32.52										20	23				3.0525	90	8.98419	4.218	6.771	6.327	4.662	18.18	333.36	269.88	82.92	4	501.165	0		36	3.40814	G A
20	Black	No	60.05	Female	164.3	69.9	25.8942	Yes	90	4.6065	4.218	2.9415	2.3865				10.5	13.92	22.74	56.16	15.48	16.92	10.32	56.16	90	40	47	47	45		53	2.6085	90	2.1497	5.217	7.77	9.435	10.8225		288	402	498	4	777.555	151.515	26	22		A A
21	More than 1 race	Yes	39.19	Male	184.6	170.2	49.9455	Yes	240	2.997	4.107	3.774	3.996	3.8295	3.0525	3.552	16.32	4.62	3.36	61.2	46.74	24.6	24.36	61.2	90							3.0525	120	2.17382	5.3835	8.0475	8.1585	8.214	105	840.48	756.48	1266.12	4	690.975	44.955			25.123	G A
22	White	No	62.3202	Male	184.6	109.3	32.0743	Yes	240	5.4945	5.3835	5.1615	4.329	3.663	2.775	3.4965	64.26	98.4	284.04	81.78	53.76	77.52	55.74	284.04	60	23	29	29	41	48	39	3.108	180	15.6923	8.325	12.321	16.8165	17.2605	24.24	88.92	137.52	95.46	3	1264.57	265.568	14	36	8.9688	A A
23	Black	No	40.0912	Female	160	91.7	35.8203	Yes	120	4.773	4.3845	3.33	2.7195	2.9415																		6.2715	240		5.0505	6.66	6.3825	6.7155	14.76	89.64	120.48	62.7	4	572.76	0			3.31313	A A
24	White	No	58.7774	Female	163.5	84.5	31.6098	Yes	240	5.7165	5.439	5.106	4.44	3.3855	3.1635	3.33	96	10.02	212.94	253.38	150.72	51.54	51.12	253.38	90							3.9405	180	24.3904	5.2725	9.4905	9.879	8.103	41.58	145.26	94.2	161.64	3	755.078	122.378			9.74358	A A
25	Black	No	34.3334	Male	175.4	82.7	26.8811	Yes	90	4.884	4.44	3.3855	2.109				50.82	43.68	86.58	177	115.8	57.54	48.06	177	90	31	48	60	52	123	85	2.7195	180	11.0313	6.0495	8.991	10.3785	11.5995	37.92	147.24	363.42	270.06	4	864.135	138.195	33	43	10.1954	A A
26	White	No	44.5293	Female	168.2	62.8	22.1977	Yes	240	4.2735	4.218	4.107	3.9405	3.774	3.774	3.7185	31.2	29.4	31.8	22.2	33.6	24.6	32.4	33.6	120	43	27	26				3.2745	240	5.92592	4.44	5.3835	6.993	4.773	84	630	2466	690	4	476.19	0	32	26	16.576	A A
27	White	No	54.7554	Female	166.5	91.4	32.9699	Yes	240	4.329	4.4955	4.2735	3.33	2.7195	3.2745	3.885	25.5	24.78	115.8	35.34	22.38	1.44	15.72	115.8	60		19	28	31	34	31	2.886	90	4.9062	5.994	10.212	14.985	12.5985		53.04		163.68	4	999	279.72		19		G A
28	Asian	No	43.09	Female	163.7	55.6	20.7481	Yes	240	4.662	4.662	4.107	2.775	3.0525	3.663	4.0515	17.76	20.04	281.88					281.88	60							2.0535	60	3.67987	4.773	6.882	6.7155	4.218	14.76	173.82	256.56	24.48	4	505.327	0			3.13109	A A
29	White	No	54.5089	Male	172.7	78	26.1523	Yes	240	4.662	4.551	4.329	3.552	2.1645	2.886	3.3855	10.44	20.16	53.04	76.5	35.58	8.28	17.28	76.5	90	14	37	39	31			3.219	120	2.16317	4.6065	6.549	6.4935	5.3835	358.08	311.04	423.12	605.52	4	524.475	0	15	55	73.3109
30	Black	No	53.4166	Male	167	90.9	32.5935	Yes	120	5.439	5.4945	5.2725	4.551	3.0525			26.1		94.86	57.96	35.16	27.3	22.26			62						4.44	120	6.30924	6.1605	9.4905	12.1545	14.652	108	294	324	672	4	999	259.74			29.5704	G A
31	Black	No	57.98	Male	172.4	111.2	37.4137	Yes	240	5.7165	5.6055	5.328	4.773	4.0515	3.108	3.552	27.12									7.4		12		23	17	2.7195	240	6.89029	4.0515	5.9385	6.6045	6.7155	19.2	276	324	318	4	539.46	53.28	5.9	13	3.45728	A A
32	Black	No	47.4782	Male	176.8	100.8	32.2475	Yes	60	4.1625	3.885	2.2755					12.66	14.64	12.9	21.72	114.78	24.18	15.12	114.78	120							2.553	90	2.3421									N/A						A A
33	White	No	65.8056	Male	164.5	112.7	41.6478	Yes	180	5.6055	5.328	5.0505	4.6065	4.1625	3.2745		16.44	76.92		20.1	38.58	43.32	21.18			48.7		22			33	2.0535	90	4.09575	5.9385	9.1575	10.989	10.0455	126	258	480	618	4	830.003	117.383	36.9	23	33.2556	A A
34	White	No	57.57	Male	178.8	106.9	33.4382	Yes	120	4.0515	3.996	3.774	3.108	1.4985						176.28		14.4	22.38			55	23	26	38	34	14	3.552	240		5.1615	8.658	9.213	7.3815	121.68	797.46	988.08	391.5	4	696.803	77.4225	41	28	27.9134	A A
35	White	No	47.53	Male	169.2	81.7	28.5379	Yes	60	4.995	4.995	4.3845					15.06	16.02	11.94	3.84	29.16	15.3	12.3	29.16	120							2.9415	120	3.34332									N/A						A A
36	White	No	49.5042	Female	157.2	71.7	29.0144	Yes	120	5.0505	4.9395	4.662	3.108	1.998			42.84	42.66	92.88	124.02	65.22	77.94	56.4	124.02	90							3.108	90	9.61615	4.662	5.772	6.9375	5.55	42.42	101.82	348.9	187.26	1	513.653	0			8.78942	A A
37	White	No	52.58	Male	176.5	73	23.4333	Yes	240	4.1625	3.9405	3.219	2.442	2.6085	2.553	2.7195	42.36	39.24	68.64	49.2	27.42	33.84	36.96	68.64	60		38	28	55	80	41	3.33	240	7.8366	4.995	8.436	9.3795	9.3795	60.84	620.34	707.7	461.28	4	750.082	150.683		28	13.5065	G G
38	White	No	42.13	Male	186.5	107.6	30.9353	Yes	90	5.2725	5.106	3.33	1.665				53.28	39.48	43.92	31.86	30.24	43.74	34.62	53.28	0	17	49	31	37	52	61	3.6075	180	12.4853	5.772	8.4915	10.6005	8.991	57.6	204	258	558	4	770.062	77.4225	17	53	14.7763	G A
39	Black	No	42.0926	Male	172.2	72.4	24.4159	Yes	60	5.328	4.9395	2.997							43.26	73.5	31.98	14.7	11.88									2.775	60										3						A A
40	White	No	57.5726	Male	178.8	90	28.1519	Yes	60	4.44	4.3845	2.553					19.14	23.4	30.3	53.52	27.24	11.94	16.74	53.52	90							2.8305	120	3.77696									N/A						G A
41	White	No	49.6683	Male	181.4	114	34.6442	Yes	120	5.55	5.328	4.6065	3.552	2.9415			43.08	30.3	36.72	44.46		73.92	38.82			13	33	22	69	47	32	2.2755	60	10.6264	4.4955	6.882	7.1595	3.552	65.4	424.08	682.02	99.72	4	487.845	0	21	59	13.0669	A A
42	White	No	49.2522	Female	166.4	97.6	35.2487	Yes	240	5.772	5.55	4.44	3.33	2.9415	3.219	3.663	17.82	19.2	115.2	62.76				115.2	60	9	21	18				4.0515	240	4.57142	4.551	5.1615	4.995	5.1615	7.5	2.4	3.54	78.42	4	452.88	0			1.517	A A
43	White	No	53.36	Female	165.2	82.2	30.1198	Yes	240	4.8285	4.662	3.6075	2.22	3.1635	3.8295	4.1625	12.42	7.92	38.88	10.44				38.88	60		26					2.7195	120	2.66533	4.662	7.3815	7.0485	7.437	1.26	5.46	295.74	469.5	4	620.212	60.7725			0.261072	A A
44	Black	No	30.25	Female	161.2	74.1	28.516	Yes	120	4.7175	4.329	3.2745	2.3865	4.995																		2.2755	60		5.1615	6.9375	8.214	5.661	14.52	130.5	353.34	101.94	4	578.588	0			3.33089	G A
45	White	No	30.99	Female	172.5	83.9	28.1958	Yes	240	5.328	5.439	3.6075	2.22	3.2745	3.663	3.996	32.76	48.78	113.94	49.44				113.94	60		24	22	26	57	46	2.7195	120	7.75757	4.662	6.549	7.7145	4.551	5.76	67.08	333.48		4	518.648	0		26	1.19347	A A
46	White	No	47.9435	Female	163.8	73	27.2079	Yes	240	4.1625	4.1625	4.107	3.663	3.219	3.1635	3.1635	6.24	17.04	69.84	183.6	119.22	36.18	14.1	183.6	90		25					2.886	120	1.1544	4.8285	7.3815	7.4925	6.771					4	609.39	29.97		36		0 0
47	White	No	49.2495	Male	180.9	81.6	24.9352	Yes	120	5.106	4.995	4.551	3.33	2.1645			30.06	142.38	185.64	52.02	76.92	38.52	33.6	185.64	60	25	34	32	34	39	33	3.219	180	6.82162	5.7165	8.436	10.9335	9.657	60	216	480	672	3	792.54	106.56	16	25	15.244	A A
48	White	No	45.89	Female	163.1	88	33.0807	Yes	60	4.6065	4.44	2.3865					9.18	46.74	39.48	32.7	24.36	16.32	15.78	46.74	30	11	24	14				2.9415	180	1.87945									N/A						A A
49	Black	No	31.1738	Male	166.7	79.5	28.6086	Yes	90	4.3845	4.1625	3.774	2.886				198.48	313.5	500.34	272.94	155.64	69.24	122.76	500.34	60		43					3.996	240	38.6771	5.661	6.8265	7.659	8.2695	22.5	67.68	7.68	23.1	4	652.68	0		20	5.661	A A
50	White	No	53.1565	Male	179.2	113.5	35.3443	Yes	240	5.217	5.439	5.3835	5.1615	4.662	3.1635	4.0515	59.52	30.18	34.26	43.32	42.36	42.6	48.54	59.52	0	9	25	28	34	38	25	1.665	90	13.8007	4.7175	7.215	9.2685	9.2685	48.6	366	630	594	4	704.295	138.195	11	24	10.1898	G A
51	White	No	41.91	Male	193.04	108.86	29.2128	Yes	240	4.773	4.662	4.2735	4.107	2.9415	3.6075	3.6075	15.54	13.74	28.74	27.78	24.12	24.54	29.1	29.1	240		33					2.109	90	3.29655	4.884	5.8275	6.66	9.324	83.88	50.52	76.08	34.08	4	627.705	41.625		44	18.2076	A A
52	White	No	61.5701	Female	153	94.5	40.3691	Yes	240	4.8285	4.7175	4.662	4.1625	3.9405	3.1635	3.441	16.32	31.14	219.78					219.78	60		20	21			5.4	3.4965	240	3.50227	5.3835	9.6015	9.435	6.882	12.78	92.64	42.72	109.56	4	716.783	70.7625	5.8	24	3.05783	G A
53	White	No	75.04	Male	178	88.2	27.8374	Yes	240	5.1615	5.328	4.551	3.7185	3.552	3.6075	4.4955	116.34	177.6	908.76	388.2	276.12	189.06	123.42	908.76	60		17	13	22	23	12	2.8305	90	26.6884	4.4955	6.327	5.4945	5.1615	28.26	112.86	296.46	173.4	4	494.505	0		26	5.64635	A A
54	White	Yes	34.6235	Male	187	77.9	22.2769	Yes	240	5.217	5.0505	4.7175	3.663	2.775	3.219	4.1625	66	66	174	138	39.6	34.2	19.2	174	60							3.219	180	15.3032	5.7165	11.5995	10.767	5.439	163.8		577.74	169.98	0	758.408	72.4275			41.6161	G A
55	Black	No	48.32	Female	161.29	81.65	31.3864	Yes	120	4.551	4.551	4.2735	3.774	2.8305			75.96		311.16	345.66	102.78	54.12	67.98			6.7	76	102	120	63	68	3.4965	180	15.3642	5.106	5.883	7.326	8.658	32.52	117.54	141.96	188.52	4	622.71	9.99	8.1	17	7.37987	G G
56	White	Yes	29.8596	Male	187.9	114.3	32.3737	Yes	120	4.884	4.551	4.329	4.2735	3.552			33.54	40.68	51.72	150.84	146.16	43.92	30.54	150.84	90	12	27	23	23	35	49	2.7195	60	7.28042	4.995	9.4905	10.434	6.438	78.24	648.72	856.74	419.76	4	709.29	109.89	12	15	17.3693	A A
57	Black	No	45.65	Female	156.3	89.8	36.7586	Yes	240	5.0505	5.217	4.884	4.8285	4.4955	3.9405	3.552	42.42	38.28	13.26	41.28	39	21.72	33.6	42.42	0	16	42	35	44	45	34	3.2745	180	9.52188	4.9395	6.549	6.8265	7.6035	70.26	300.84	256.44	383.88	4	601.065	8.325	16	26	15.4244	A A
58	White	Yes	46.2432	Male	187	131.4	37.5761	Yes	240	5.328	5.2725	4.662	3.663	3.2745	4.1625	3.996	20.04	12.72	67.32	42.24	27.66	30.24	24.54	67.32	60		25	29	34	63	36	3.108	120	4.74547	5.883	11.544	11.433	7.437	95.46	630.96	561.72	578.58	4	829.17	123.21		42	24.9596	A A
59	White	No	45.06	Male	173.1	77.1	25.7312	Yes	240	4.9395	4.8285	4.662	4.1625	2.7195	3.6075	3.885	84	126	126	216	138	180	102	216	90	11	38	29						18.4408	5.55	10.212	10.656	6.7155	24.42	136.74	117.18	85.14	4	750.915	84.915	12	30	6.0236	A A
60	Black	No	52.4419	Male	173.2	104.2	34.7354	Yes	240	4.6065	4.551	4.551	4.329	4.0515	3.996	3.6075	47.64	92.16	169.98	60.78				169.98	60	16	16	12	21			3.1635	90	9.7535	4.3845	6.327	6.9375	5.0505	7.5	75.42	241.68	90.36	4	511.155	0	13	15	1.4615	A A
61	White	No	49.4164	Female	158.1	88.1	35.2462	Yes	90	4.4955	4.3845		2.0535				80.1	117.24	165.78	145.5	96.78	80.76	42.84	165.78	60	11	5	5				1.9425	60	16.004	4.0515	6.771	7.215	6.1605	66	888	1026	702	4	556.943	70.7625	10	5	11.8844	A A
62	White	No	46.1009	Male	183.3	94.5	28.1259	Yes	240	4.995	8.658	3.0525	2.109	3.663	4.1625	3.996	52.08	62.64	58.32	77.46	79.14	83.46	33.18	83.46	180		14	19	16	41	36	2.9415	90	11.5618	5.6055	7.6035	7.548	7.659	63.66		384.78	319.02	4	655.178	0		31	15.8598	A A
63	White	No	57.93	Female	163.8	139.4	51.9559	Yes	240	5.106	4.884	4.8285	4.3845	3.7185	3.219	3.774	50.64	50.04	199.86	84.72				199.86	60							3.1635	240	11.4919	3.774	4.995	3.885	4.107	10.14	203.1	86.52	134.88	3	387.945	0			1.70082	A A
64	White	No	58.0162	Male	176.6	97.9	31.3907	Yes	240	4.773	5.1615	4.7175	3.885	2.9415	3.3855	4.218	31.32	3.72	47.4					47.4	60	5	60	151				3.7185	240	6.64402	3.9405	6.2715	5.0505	2.664	15	258	216		4	402.93	0	5.1	60	2.627	G A
65	White	No	43.31	Female	153.6	95.9	40.6477	Yes	180	6.438	5.9385	5.772	5.439	4.551	2.442		107.88	58.14	675.06	84.42				675.06	60	13	44	56	48	51	40	3.8295	90	30.8681	3.33	6.327	7.548	7.9365	11.28	299.16	478.08	326.94	4	591.075	191.475	8.2	59	1.66944	A A
66	Asian	No	30.9356	Male	166.1	79.9	28.9606	No	0	5.2725							50.64	54.54	49.38	30.78	100.44	60.48	42.3	100.44	120	16	27	20	49	43	20	3.108	180	11.8666	4.995	6.438	7.4925	8.3805	55.38	74.7	156.54	226.5	4	631.867	32.4675	17	20	12.2944	A A
67	Black	No	51.87	Female	152.4	106.4	45.8112	Yes	90	5.2725	5.217	4.218	2.331				26.28	138.96	45.24					138.96	30	2.4	17	15	29		20	2.886	120	6.15828	4.4955	8.4915	8.8245	5.6055	13.02	132.42	177.72	132.24	4	622.71	83.25	2.8	11	2.6014	A A
68	White	No	37.6107	Male	188.2	152.3	42.9992	Yes	240	4.995	5.106	4.995	5.217	4.773	3.8295	3.3855	35.7	79.56	136.14	301.08	257.16	118.26	78.18	301.08	90							3.663	120	7.9254	5.328	8.1585	8.88	7.437	28.02	292.98	490.38	373.14	4	680.985	41.625			6.63514	A A
69	White	No	50.1585	Female	167.9	78.8	27.9528	Yes	240	5.772	5.55	5.0505	4.1625	3.441	2.775	3.441	5.64	45.42	44.34					45.42	30	3.2	19	17	40	29	22	2.7195	60	1.44685	5.0505	6.993	7.77	5.4945	11.58	156.36	182.22	55.68	4	566.933	0	4.6	11	2.59932	A A
70	Black	No	46.0872	Male	174.8	99.2	32.466	Yes	240	5.55	5.328	4.1625	2.775	4.3845	4.44	4.44	26.64	5.64	7.44	7.98	97.2	63.12	39.36	97.2	120	30	29	31	47	39		2.22	90	6.5712	5.1615	6.771	6.1605	4.662	56.34	308.88	272.28	134.76	4	512.82	0	41	30	12.9244	G A
71	White	No	61.29	Male	180	129.7	40.0309	Yes	60	5.0505	4.7175	3.1635					11.76	17.16	21.54	27.96	60.36	26.34	14.7	60.36	120							3.4965	240	2.63973									3						A A
72	Black	No	62.67	Male	189.9	85	23.5705	Yes	240	5.439	5.3835	4.8285	4.107	3.885	4.218	4.551	17.82	12.12	11.88	22.02	51.06			51.06	120		23	22				3.108	120	4.30769	4.329	5.772	5.106	6.1605	21.78	150	205.38	156.72	4	499.5	0		31	4.19047	A A
73	White	No	45.9804	Male	178.1	100.1	31.5578	Yes	240	4.4955	4.4955	4.329	3.9405	3.663	2.8305	3.552	36.06	95.1	166.2	46.92	9.3	49.14	33.42	166.2	60		42	52	57	58	71	3.774	180	7.20479	5.9385	8.8245	9.8235	11.3775	58.68	690.3	803.46	948.9	4	842.49	129.87		51	15.4876	A A
74	White	No	61.5918	Male	190.5	103	28.3823	Yes	240	4.9395	4.773	4.551	3.9405	3.663	3.2745	3.6075	8.22	17.28	29.64	37.62	29.58	34.08	30.54	37.62	90	9.7	56	47	70	89	56	3.885	180	1.80456	4.662	9.6015	12.432	4.0515	84	1122	1056	96	0	666	106.56	10	85	17.4048	A A
75	White	No	57.9095	Male	171	78	26.6749	Yes	90	5.217	5.106	3.774	2.6085				30.18	12.96	20.88	63.12	25.8	17.4	26.82	63.12	90	33	49	40	41	78	82	2.6085	120	6.99774	6.2715	9.4905	12.321	8.658	81.48	374.28	665.7	711.6	4	823.342	70.7625	27	41	22.7112	G A
76	White	No	50.131	Female	171	75.7	25.8883	Yes	240	4.0515	4.4955	3.996	2.7195	3.108	5.439	3.33	33.24	78.42								9.2	15	16				3.6075	180	5.98542	4.44	7.1595	6.105	6.4935	18.24	168.9	201.72	169.32	4	567.765	34.965	7.1	18	3.59936	A A
77	White	No	35.9351	Male	168.8	92.5	32.4636	Yes	240	4.7175	4.551	4.2735	4.107	3.1635	3.552	3.3855	27.9										19	19				3.33	180	5.8497	4.6065	6.327	6.993	6.66	16.86	130.98	345.06	267.96	4	563.602	10.8225		25	3.4518	G A
78	Black	No	54.54	Male	186.8	62.8182	18.0025	Yes	240	4.995	4.551	4.107	3.8295	3.885	3.108	3.552	52.8	78	198	126	72	51.6	45	198	60		35	26	34	29	43	3.441	120	11.7216	4.995	7.77	8.547	5.772	48.54	1524.42	1453.38	384.9	4	609.39	9.99		34	10.7759	A A
79	White	No	24.685	Female	158	45.9	18.3865	Yes	240	4.995	4.8285	4.107	3.33	3.3855	3.7185	3.774	132	186	546	450	282	138	90	546	60		29	22	53	49	31	2.775	120	29.304	5.328	8.547	9.546	5.8275	26.28	157.2	388.2	355.38	4	654.345	14.985		34	6.2231	A A
80	Asian	No	27.2834	Female	158.9	46.5	18.4164	Yes	120	4.884	4.7175	4.107	3.33	3.2745			29.7	48.48		64.98	330.96	71.46	57.6			9.8			89	54	30	2.22	180	6.44688	5.1615	6.3825	6.4935	7.104	38.04			704.46	4	579.42	0	13	18	8.72638	A A
81	Black	No	27.0587	Female	170	53.4	18.4775	Yes	60	4.551	4.4955	2.442						12.54			24.66		9			48	21	21	22	35	28	3.0525	180										N/A
82	White	No	51.0182	Male	173	55.6	18.5773	Yes	240	5.217	5.328	4.3845	2.22	3.8295	3.9405	4.218	84	72	120	66	108	90	66	120	60	6.8	26	26				2.997	60	19.4768	4.3845	5.883	6.7155	7.437	38.28	146.64	269.94	363.84	4	566.1	39.96	4.2		7.4595	G G
83	Black	No	25.1559	Male	180.8	61.6	18.8445	Yes	240	4.107	4.329	4.107	3.9405	2.8305	3.1635	3.3855	32.4	39.6	50.4	49.8	72	84	45.6	84	180	18	21	26	46	13	26	3.6075	120	5.91408	4.7175	5.4945	6.1605	5.661	51	198	276	198	4	497.835	0	20	33	10.693	A A
84	White	No	54.0737	Female	173	58.8	19.6465	Yes	240	4.884	5.106	4.884	3.9405	2.2755	3.9405	4.329	33.3	43.68	187.5	117.54	27.48	56.34	21.42	187.5	60	89	30	30				2.442	180	7.22832	5.106	8.1585	9.102		144	1230	1350		4			62	33	32.6784	A A
85	Asian	No	27.1	Male	172	58.6	19.808	Yes	120	5.2725	5.3835	5.2725	4.9395	4.1625					73.2	103.62	40.86											3.996	240		5.55	6.993	9.1575		17.82	36.66	139.32		4					4.3956	A A
86	White	No	56.8006	Female	165.2	54.1	19.8234	Yes	240	5.3835	4.995	3.774	2.8305	3.6075	4.218	4.884	72	60	60	114	108	300	168	300	180	25		15	27			2.8305	120	17.2272	4.551	9.213	9.3795	7.659	26.94	325.08	666.6	602.34	4	715.118	168.998	14	13	5.44906	A A
87	White	No	23.3051	Male	173.25	59.7	19.8897	Yes	60	5.0505	4.8285	3.774																				2.442	120										0						A A
88	White	No	55.9327	Male	190.1	72.3	20.0066	Yes	240	5.106	4.773	4.107	3.1635	2.775	3.663	4.107	25.98	106.32	125.82					125.82	60		30	34	47	35	43	3.441	240	5.89573	4.44	6.6045	7.881	8.4915	14.52	7.02	56.04	166.44	4	637.695	104.895		31	2.86528	A A
89	White	No	27.8145	Female	167.8	56.6	20.1017	Yes	90	4.2735	3.9405	2.8305	1.665				18.78	22.32	57.3	98.16	51.72	23.58	22.62	98.16	90	52	35	39	37	48	64	2.886	90	3.56695	6.9375	9.1575	11.7105	12.21	87.3	192.66	272.34	501.54	4	920.745	88.245	54	47	26.9175	A A
90	White	No	57.6712	Female	161	52.5	20.2538	Yes	240	5.328	5.439	3.219	2.553	3.4965	3.774	3.996	102	108	264	324	264			324	90		25	30	41	37	39	3.3855	120	24.1536	4.662	6.216	4.773	4.773	17.64	107.4	133.44	66.12	4	471.195	0		42	3.65501	A A
91	White	No	23.5187	Female	162.6	54.1	20.4624	Yes	60	5.217	5.439	3.552																				3.441	90										N/A
92	Native Hawaiian/Pacific Islander	Yes	20.5725	Male	168	58.1	20.5853	Yes	240	4.551	4.107	2.886	3.4965	3.219	3.3855	3.6075	63.12	34.14	219	133.26				219	60		42	60						12.7671	4.329	4.662	4.773	5.3835	10.68	22.02	17.82	54.66	4	437.895	0			2.05483	A A
93	White	No	62.0929	Female	158	51.8	20.7499	Yes	240	4.8285	4.884	4.218	2.8305	3.4965	3.8295	4.0515	18.6	30.6	108	30	22.8	27.6	31.2	108	60	17	21	16	16	22	43	2.6085	120	3.99156	4.9395	8.2695	8.103	6.9375	78	486	612	318	4	651.848	59.1075	28	25	17.1236	A A
94	Black	No	68.8256	Male	184.1	70.4	20.7714	Yes	240	5.217	5.1615	4.2735	3.552	4.1625	3.8295	3.33	7.32										13	12	24	19	14	3.7185	240	1.69726	4.3845	6.1605	6.9375	6.3825	18.3	165.9	261.18	241.08	4	546.12	19.98		11	3.56606	A A
95	White	No	69.14	Female	169.5	59.8	20.8143	Yes	240	5.7165	5.661	4.773	3.663	3.0525	3.663	4.329	39.18	49.08	137.46	115.5	110.34	61.56	28.38	137.46	60	34	57	52	56	64	88	2.331	120	9.95433	6.3825	9.2685	12.9315	13.0425	67.44	299.1	738.66	1560.84	4	959.04	193.14	30	64	19.1305	A A
96	White	No	22.2374	Female	167.8	58.7	20.8475	Yes	240	4.6065	4.6065	4.44	4.44	3.663	3.1635	3.33	23.28	51.24	119.1	128.34	84.9			128.34	90							2.442	120	4.76619	4.9395	5.883	7.3815	4.551	18.24	64.26	154.92	51.24	3	497.835	0			4.00429	A A
97	White	No	33.26	Female	165.9	57.4	20.8554	Yes	90	4.4955	4.2735	3.996	1.443				46.26	62.34	88.92	70.38	53.34	47.94	29.1	88.92	60	160	80		113	139	114	3.3855	90	9.24275	5.2725	8.658	11.2665	13.764	76.98	348.06	532.2	636.54	4	920.745	288.045	140	85	18.039
98	White	No	62.8488	Female	160.75	53.9	20.8587	Yes	90	5.1615	5.0505	4.1625	2.442				43.44	60.06	129.24	143.34				143.34	90		13	19	32	34	18	2.775	90	9.96514	4.8285	7.104	9.1575	7.437	9.78	78.72	173.52	145.5	4	646.02	66.6		15	2.09879	A A
99	Black	No	35.5489	Male	169.4	60.2	20.9783	Yes	120	3.8295	3.552	3.552	3.219	1.8315			25.92	22.32	24.3	27.36					120	11	21	25	44			3.552	120	4.41158	4.0515	5.7165	7.1595	7.3815	3.54	64.32	251.88	135.12	4	561.105	74.925	8.8		0.637436	A A
100	White	No	79.38	Female	159.385	53.5	21.06	Yes	240	4.884	5.0505	4.0515	3.33	2.7195	3.108	3.108	72									8	10	5				3.0525	180	15.6288	4.662	7.6035	10.101	6.771	16.2	300	684	426	4	652.68	93.24	6.5	10	3.35664	A A
101	White	No	55.2782	Female	159.5	53.6	21.069	Yes	240	4.995	4.773	3.7185	2.997	3.663	3.3855	3.774	28.2	55.8	78	37.8				78	60	8.1	5	5	17	13	10	1.6095	60	6.2604	4.773	10.989	13.764	6.327	4.8	114	192	26.4	4	797.535	224.775	5.7	5	1.01824	G A
102	White	Yes	22.1387	Female	161.5	55.1	21.1255	Yes	180	4.884	5.106	4.884	4.44	3.552	3.4965		88.56	98.22	124.2	116.76	113.64	9.3	317.82	317.82	240		51	36	44	57	55	2.442	90	19.2234	4.6065	5.217	5.0505	8.103	25.44	210.06	64.08	120.3	4	544.455	0		34	5.20842	A A
103	White	No	23.85	Female	160.5	54.5	21.1566	Yes	240	4.662	4.7175	4.884	4.8285	4.4955	2.9415	3.7185	58.2	47.4	168		52.8	14.4	18.6			18.6						2.442	60	12.059	6.549	8.436	9.2685	7.881	174	39.6	336	246	4	726.773	0			50.6456
104	White	No	26.5523	Female	165.6	58.4	21.2957	Yes	120	4.6065	4.773	4.8285	3.33	2.9415							44.34	33.06	43.2			36		14				3.2745	90		5.1615	5.439	7.326	6.993	51.6	132.66	242.16	229.44	4	560.273	0			11.837	A A
105	Black	No	26.3741	Male	182	70.6	21.3139	Yes	240	3.9405	4.218	3.8295	2.7195	3.8295	3.33	3.441	27	33.6	34.2	30.6	31.2	20.4	25.8	34.2	60	27	29	38	48	48		2.997	60	4.7286	5.661	7.881	8.9355	8.6025	96.72	284.7	301.8	250.86	4	713.453	34.1325	19	44	24.3348	A A
106	White	No	36.9315	Male	179.9	69	21.32	Yes	60	4.6065	4.329	1.6095					7.02	20.28	20.94	44.16	24.24	21.96	16.26	44.16	90	14	12	15	14	21	16	2.109	90	1.43723									N/A						G A
107	White	No	18.9299	Female	169.2	61.1	21.3423	Yes	90	4.44	4.4955	3.1635	1.9425				53.28	82.68	121.38	154.56	109.86	42.72	57.66	154.56	90	7.3	36	32	33	43		2.886	120	10.5139	5.0505	8.88	8.103	5.9385	38.82	589.08	443.04	202.26	4	641.858	35.7975	11	33	8.7138	A A
108	Asian	No	19.1599	Female	155.5	51.7	21.3811	Yes	90	4.44	4.329	2.997	2.0535				34.32	57.54	131.22	45.3	67.32	41.16	43.44	131.22	60	21	28	23	27	46	43	3.2745	90	6.77248	5.0505	7.548	11.322	11.8215	52.26	151.44	169.2	434.88	4	826.673	220.612	20	33	11.7306	A A
109	White	No	20.9915	Female	162	56.2	21.4144	Yes	240	4.329	4.4955	2.553	2.8305	3.0525	3.7185	3.774	59.88	90.42	124.38	72.96	41.04	30.72	41.76	124.38	60	8.3	20	16	23	32	23	3.219	90	11.5209	4.8285	7.77	7.548	6.216	57.6	288	336	288	4	605.228	25.8075	6.7	25	12.361	A A
110	White	No	51.21	Female	156.2	52.25	21.4153	Yes	240	4.662	4.8285	3.663	2.997	3.552	3.774	4.0515	67.26	131.1	338.64	909.3				909.3	90							2.775	90	13.9363	4.6065	8.2695	8.214	5.772	11.7	112.56	205.56	130.68	4	613.553	60.7725			2.39538	A A
111	White	No	57.6822	Female	154.7	51.3	21.4357	Yes	60	5.0505	4.662	3.108					19.68	24	20.1	30.78	38.22	22.56	15.78	38.22	120	7.1	16	17	18	24	27	2.775	120	4.4175									N/A						A A
112	White	No	22.8341	Male	185	73.5	21.4755	Yes	240	4.7175	4.662	4.44	3.996	3.774	3.33	3.4965	37.2	21.36	100.44	60.12	63.36	7.62	24.36	100.44	60		39	33	63	49	36	2.7195	120	7.7996	5.2725	7.77	8.4915	6.327	108.18	619.98	830.52	647.64	4	629.37	0		37	25.3502	A A
113	Black	No	26.0813	Male	185	74.2	21.6801	Yes	240	5.2725	4.9395	4.662	4.329	4.551	4.773	4.7175	22.8	42.84	43.68	146.4	109.14	75.9	102.66	146.4	90	16	23	33	66	48	33	1.776	90	5.3428	5.4945	8.325	8.9355	7.992	24.36	228.78	361.08	247.86	4	705.96	46.62	13	17	5.94871
114	Asian	No	35.41	Male	173.9	65.7	21.7253	Yes	120	5.3835	5.55	4.7175	3.441	3.9405			17.76	17.58	33.6		51.9	32.76	34.92			14	25	24	45	34	29	4.0515	120	4.24938	7.1595	10.767	10.6005	11.1555	44.4	276	270	306	0	924.075	64.935	12	20	14.1281	A A
115	White	No	19.6636	Male	176	67.4	21.7588	Yes	240	4.7175	4.4955	2.553	3.2745	3.4965	3.885	3.996	31.02	38.28	135.66	70.62	42.66	39.9	33.78	135.66	60							2.22	120	6.50386	4.3845	6.0495	7.7145	6.66	76.98	311.52	348.42	343.5	3	562.77	36.63			15.0008	G A
116	Asian	No	28.4084	Female	166.5	60.5	21.8236	Yes	240	5.328	4.995	4.9395	4.3845	3.3855	3.219	3.9405	36.84	34.14	112.14	176.58	56.82	28.92	25.68	176.58	90	94	46	40	29	55	45	2.3865	90	8.72371	5.8275	9.2685	10.4895	10.767	94.14	367.68	648.54	839.58	4	845.82	146.52	48	27	24.3823	A A
117	White	No	41.9749	Male	172.5	65.2	21.9114	Yes	60	4.329	4.1625	2.2755					20.1	26.76	15.78	14.28	42.18	58.32	11.52	58.32	180							3.1635	120	3.86724									0						G A
118	White	No	21.75	Female	169.2	62.9	21.971	Yes	240	4.3845	4.3845	4.1625	3.885	3.7185	3.552	3.3855	37.56	36.12	156.18	113.7	98.28	32.88	53.46	156.18	60	8.2	21	30				2.6085	120	7.31919	4.6065	6.438	5.9385	6.2715	45.6	426	288	282	4	539.46	0	9.5	14	9.33584
119	Black	No	33.857	Female	167	61.6	22.0876	Yes	240	5.6055	5.3835	4.9395	3.663	3.1635	3.7185	4.2735	144	180	192	162	708	246	132	708	120	16	32	32	35	48	38	2.9415	120	35.8752	5.3835	7.548	8.8245	6.7155	23.34	240.3	129.96	220.14	4	641.025	0	11	41	5.58448	A A
120	White	No	20.61	Male	174.2	67.1	22.1119	Yes	240	5.439	5.55	5.6055	5.3835	5.1615	2.886	3.996	6.78	27.06	122.4					122.4	60	4.6	21	13	18		42	2.109	90	1.63895	4.2735	4.884	4.662	5.0505	15	96	69.9	52.08	4	432.067	0	4.2	18	2.849	A A
121	White	No	57.0498	Female	141.8	44.5	22.1313	Yes	240	4.44	4.773	3.7185	2.2755	3.219	3.1635	3.663	60	53.4	84	174	120	108	45	174	90	48	34	39	33	57	50	3.1635	180	11.84	5.328	5.55	9.1575	9.0465	45.42	100.68	311.04	136.62	4	655.178	15.8175			10.7555	A A
122	Black	No	44.22	Male	161.5	57.8	22.1607	Yes	240	5.1615	5.217	5.1615	4.884	4.44	2.997	3.8295	14.76	17.28	20.22	34.5				34.5	90	4.9	17	31				2.9415	90	3.38594	4.2735	5.883	7.659	6.882	5.16	38.58	55.32	70.32	4	561.938	49.1175	3.5	18	0.980056	A A
123	White	Yes	21.3722	Male	170.3	64.3	22.1708	No	0	3.9405							94.14	69.36	94.08		95.1	89.4					22	18				1.887	120	16.4871	4.4955	6.9375	6.6045	6.771	23.76	132.6	170.94	172.2	4	577.755	38.295		17	4.74725
124	White	No	27.1546	Male	183	74.4	22.2163	Yes	240	5.4945	4.995	4.4955	3.2745	4.1625	4.1625	4.2735	23.7	17.4	39.42	130.68	60.42	30.72	20.52	130.68	90	12	10	18				3.441	120	5.78754	4.9395	5.661	5.439		171.18	25.86	2.16	273.78	4				5	37.5797	G A
125	White	No	26.8424	Female	169.8	64.41	22.3397	Yes	240	4.3845	4.1625	2.8305	3.0525	3.219	3.4965	3.774	112.14	59.58	290.22	163.32	83.4	14.76	101.7	290.22	60		22					2.7195	90	21.8523	4.1625	5.328	5.55	6.438	32.82	107.58	96.12	168	4	498.668	0		26	6.0717	A A
126	White	No	22.8177	Male	184.4	76.1	22.3801	Yes	240	4.9395	4.7175	4.551	2.997	3.996	3.996	3.996	36.12	47.64	43.32	43.86	62.16	9.6	64.86	64.86	240		11	11				3.7185	90	7.92954	5.328	7.437	7.3815	6.771	32.94	178.26	271.32	136.08	4	616.883	0			7.80019	G G
127	Black	No	51.544	Male	169.5	64.3	22.3806	No	0	3.441							624.66	670.2	1170.3	653.34				1170.3	60	9	12	15	25	22	12	2.9415	240	95.5313	5.328	6.438	7.548	8.9355	10.02	28.14	30.3	194.7	4	654.345	14.985	7.9	14	2.37274	A A
128	White	No	31.2669	Male	166.5	62.1	22.4008	Yes	240	5.328	4.995	4.1625	2.886	4.329	4.107	4.0515	52.5	78.06	78	74.16	183.66	120.72	54.42	183.66	120	25	11	13	13	39	11	2.9415	120	12.432	5.772	7.77	10.4895	10.212	35.76	138.06	361.26	659.28	4	783.383	90.7425	16	16	9.17363	A A
129	Black	No	57.9724	Female	162.5	59.2	22.4189	Yes	240	4.9395	4.8285	4.2735	3.663	3.552	3.552	3.4965	42	54	55.2	144	120			144	90		41	18	42			3.2745	240	9.2204	3.996	5.2725	5.3835	5.883	21.66	98.4	77.1	85.8	4	475.357	0		35	3.84682	A A
130	White	No	22.9327	Female	167.8	63.2	22.4457	Yes	240	4.218	4.6065	4.3845	3.9405	3.663	3.108	3.33	102	78	330	186		78	72			8.3	5	17	23	22	20	1.6095	90	19.1216	4.662	6.66	6.7155	6.7155	34.2	252	432	174	4	571.928	12.4875	5.7	12	7.08624	A A
131	White	No	28.9725	Female	160.75	58.2	22.5227	Yes	60	4.1625	3.552	1.9425					15.12	24.48	17.46	33.24	20.94	15	10.86	33.24	90							5.106	240	2.7972									N/A						G A
132	White	No	59.503	Male	182.6	75.4	22.6136	Yes	240	4.329	4.2735	3.3855	2.331	3.441	3.2745	3.774	76.02	169.44	109.14	97.56	97.8	64.92	46.86	169.44	30	15	31	26	40			3.0525	60	14.6262	5.772	7.326	9.3795	7.9365	40.2	126	162	354	4	685.148	0	14	21	10.3126	A A
133	White	No	58.0655	Male	177	71.1	22.6946	Yes	240	5.1615	4.884	4.884	3.996	3.219	3.1635	3.8295	36.6	51.6	78	60							20	13	13	30	22	2.997	0	8.39604	4.662	7.659	8.0475	7.77	6.6	124.5	118.62	153.06	4	653.513	94.0725			1.36752
134	White	No	29.1643	Female	172.7	67.7	22.6989	Yes	240	4.662	4.44	2.775	3.33	3.3855	3.552	3.8295	32.28	38.34	103.38	233.28				233.28	90	6.1	28	27				2.1645	120	6.68842	4.6065	6.327	7.0485	8.547	11.22	95.34	120.54	146.16	3	621.045	68.265	4.5	21	2.29711	A A
135	White	No	31.8528	Female	181.5	74.8	22.7064	Yes	120	5.7165	5.6055	5.3835	4.6065	3.0525			67.56	64.74	12	45.6	53.04	65.58	208.74	208.74	240	16	34	32	18	32	56	3.4965	180	17.1647	6.0495	8.547	10.6005	7.0485	19.86	127.62	156.6	177.42	4	717.615	0	9	31	5.33969
136	White	No	75.1254	Female	162	59.8	22.7862	Yes	240	4.773	4.884	4.107	3.441	3.219	3.4965	4.0515	246	504	594	576	534	426	234	594	60		17	20				2.109	90	52.1848	4.995	7.881	7.8255	5.55	23.94	288.9	392.52	168.9	4	595.237	0		23	5.31468	A A
137	White	No	35.3546	Male	183.5	76.9	22.8378	Yes	240	4.551	4.884	4.329	3.441	4.0515	4.1625	4.329	22.92	24.84	26.22	22.8	21.18	22.8	116.82	116.82	240	38		17	13			3.552	120	4.63595	4.551	7.104	8.4915	7.1595	28.2	425.82	614.4	326.04	4	623.543	77.4225	26	5	5.70392	A A
138	White	No	23.0997	Female	172	67.7	22.884	Yes	60	3.885	3.996	2.7195					22.8	44.16	82.5	57.12	37.5	31.86	8.4	82.5	60	180	39	41	42	41	52	3.0525	120	3.9368									N/A			17	35		A A
139	Asian	No	24.11	Female	153	53.6	22.8972	No	0	4.3845							6.96	179.04	129.36					179.04	30	12				20	34	2.6085	90	1.35627	4.4955	8.9355			14.64	416.82			2			7.8	5	2.92507
140	White	No	52.45	Female	167.4	64.2	22.9099	Yes	180	5.439	4.995	4.884	4.773	4.6065	3.108		18.24	21.84	117.78	72	46.92	33		117.78	60	10	12	13	19			3.3855	120	4.40922	5.217	7.77	5.2725	7.4925	21.72	313.32	127.08	105.66	4	615.217	0	11	14	5.03614	G A
141	White	No	31.2914	Female	160	58.7	22.9297	Yes	90	4.4955	4.773	4.107	2.997				87.54	86.82	123.9	149.28	142.44	120.12	85.14	149.28	90	6.6	5	5	12	5	13	3.1635	90	17.4905	4.551	7.215	7.8255	5.883	31.2	210	330	180	4	578.587	32.4675	5.5	5	6.31072	A A
142	White	No	25.11	Female	167.64	64.77	23.0472	Yes	240	5.2725	5.3835	5.1615	5.217	4.551	3.9405	4.0515	28.44	21.6	46.32	523.5	21.9			523.5	90	7.5	19	31	35	34	43	1.998	120	6.66444	4.662	8.0475	9.3795	8.436	21.66	132.84	183.66	141.72	4	705.127	145.688	7.1	19	4.48795	A A
143	Black	No	22.73	Male	180.6	75.3	23.0866	Yes	90	5.1615	5.0505	4.329	1.998				31.68	31.14	33.72	37.08	57.3	26.64	63.36	63.36	240	30	37	27	53	55	40	2.997	90	7.26739	4.773	6.66	8.0475	8.991	37.2	150	300	312	4	661.837	89.0775	29	28	7.89136
144	White	No	21.69	Female	156.1	56.3	23.1048	Yes	60	5.106	4.218	1.4985							284.94													3.552	240										0						A A
145	Asian	No	62.0081	Female	153.5	54.5	23.1302	Yes	240	5.4945	5.439	4.6065	4.1625	4.0515	4.107	4.1625	4.8	3.9	90.54	71.16				90.54	60	12	22	38				2.886	180	1.17216	4.884	5.7165	5.661	5.9385	7.5	96	58.32	231.06	4	507.825	0	12	20	1.628	A A
146	Black	No	48.6142	Male	178.5	73.8	23.1622	Yes	90	5.883	5.4945	4.8285	2.109				75.3	88.38	83.7	89.52	141.42	90.48	65.1	141.42	120	13.5						3.552	120	19.6884	7.3815	10.767	14.652	10.8225	23.4	72	204		4	978.188	92.4075	12.5	22	7.67676
147	White	No	79.1693	Female	167.2	64.9	23.2152	Yes	240	5.1615	4.995	4.0515	2.9415	3.108	2.6085	3.6075	30.72	34.44	49.44	58.92	34.14	41.1	36.42	58.92	90	21	23	17	30	32	27	4.6065	120	7.04717	4.6065	9.2685	9.6015	7.548	66	426	492	468	4	717.615	164.835	20	18	13.5124	G A
148	White	No	55.0046	Male	176.9	72.9	23.2955	Yes	90	4.8285	4.662	4.1625	1.776				62.82	67.98	259.44	348.48	160.14	72.18	53.94	348.48	90	37.9						4.4955	180	13.4812	8.2695	11.0445	12.0435	13.2645	25.2	53.4	78	336	4	1033.96	41.625			9.26184	G A
149	White	No	22.7027	Male	169	66.6	23.3185	Yes	90	4.3845	4.107	3.108	1.7205				37.56	41.16	50.4	51.3	150	45.12		150	120		13	19	41	29	28	2.997	120	7.31919	4.995	8.103	9.4905	8.0475	22.14	192	216.12	222.66	4	701.797	102.397		16	4.91508
150	Asian	No	45.359	Male	178.5	74.4	23.3505	Yes	240	5.772	5.4945	4.6065	3.33	2.7195	3.4965	4.1625	22.26	24.24	39.18	57.84	28.56	33.06	35.76	57.84	90		23	24	52			3.441	60	5.71043	4.884	7.4925	6.8265	6.9375	62.82	242.58	375.66	307.68	4	608.558	22.4775		20	13.6361	A A
151	White	No	37.3452	Female	165.1	63.7	23.3693	Yes	240	7.992	7.437	6.8265	6.105	5.1615	3.885	4.2735	78.3	104.34	423.78	215.1	137.52	68.46	72.42	423.78	60	45	5	5	5	5	5	2.6085	120	27.8122	4.662				33.72		750.36	733.08	4				5	6.98678	A A
152	Black	No	54.8512	Male	178.5	74.7	23.4447	Yes	60	4.551	4.218	1.887					62.52	65.52	476.52	342.12	125.82	43.98	42.6	476.52	60	23	19	21	27	26	27	2.9415	120	12.6457	5.2725	6.4935	8.214	8.436	52.26	110.58	223.02	214.98	4	650.182	17.4825	28	28	12.2463	A A
153	White	No	26.69	Female	163.1	62.4	23.4572	Yes	240	5.328	5.106	3.885	2.7195	4.107	4.3845	4.551	78	174	630	318	234			630	60	6.5	24		46	29	21	2.9415	180	18.4704	4.7175	5.772	6.549	6.105	17.58	149.28	222.78	163.56	4	525.308	0	6.3	29	3.68594	G A
154	White	No	42.8565	Female	160.6	60.7	23.5341	Yes	180	4.551	4.773	4.44	4.218	3.219	3.441		13.62	10.86	18.12		36	18.06	12.3									3.108	120	2.75487	4.773	6.3825	6.771	7.77			173.28		4	597.735	24.975
155	White	Yes	28.7591	Male	164.2	63.5	23.552	Yes	240	4.662	4.2735	4.218	3.9405	3.663	2.553	3.1635	168	120	96	198	174	270	204	270	180	11	23	16	28	23	28	3.108	180	34.8096	4.551	6.3825	6.1605	3.7185	26.4		582	312	4	463.702	0	9.3	22	5.33984	G A
156	White	No	23.7597	Male	170	68.3	23.6332	Yes	240	5.1615	5.328	4.551	3.441	3.774	4.0515	4.3845	23.58	27.84	55.38	47.88	13.02	24.06	14.28	55.38	60							2.442	90	5.40925	4.218	7.77	8.547	8.769			296.4	395.34	4	687.645	181.485				A A
157	White	No	40.19	Male	195.5	90.4	23.6524	Yes	60	4.3845	4.4955	2.775						90	228	186	210	120	15.6	228	60							3.552	180										N/A						G A
158	White	No	53.3291	Male	180	76.8	23.7037	Yes	240	5.1615	5.0505	4.2735	3.9405	2.886	3.3855	4.107	10.38									6	45	66				2.4975	60	2.38117	4.884	7.77	4.329	6.8265	16.14	319.68	123.3	66.6	4	576.09	0	8.9	40	3.50346	A A
159	Black	No	23.26	Female	164.8	64.4	23.7122	Yes	240	4.2735	4.0515	2.664	2.331	3.108	3.219	2.8305	8.7	88.86	153	691.44	560.82	66.96	91.44	691.44	90		22	18	16			2.9415	90	1.65242	5.106	8.214	8.436	5.883	27.42	93.6	98.82	67.02	4	626.04	13.32	9.3	32	6.22251
160	Asian	No	37.6543	Female	162.2	62.4	23.7183	Yes	240	5.439	5.328	4.44	3.7185	3.0525	4.0515	4.44	4.68	10.56	19.26	27.48	21.66	37.44	14.76	37.44	180		18	18	16			1.8315	120	1.13131	4.551								4			9.4
161	White	No	70.0904	Male	169.7	68.4	23.7516	Yes	240	5.772	5.55	5.55	4.995	4.3845	3.552	3.663	24	53.88	152.16	45.36	26.16	26.88	25.92	152.16	60	86	135	164	153	141	113	3.9405	240	6.1568	5.994	8.0475	10.9335	7.992	90	312	408	312	4	735.098	15.8175	62	61	23.976	A A
162	White	No	19.99	Female	164.1	64	23.7664	Yes	240	4.884	4.995	4.6065	3.8295	4.1625	4.218	4.44	64.2	78.6	331.56					331.56	60	4.1	25	26				4.1625	120	13.9357	4.9395	7.0485	6.993	6.549	14.28	182.94	106.8	119.88	4	586.913	0	4.3	19	3.13494	G A
163	Asian	No	63.2758	Female	142.7	48.4	23.7683	Yes	240	6.7155	6.6045	6.1605	5.3835	4.1625	2.997	3.552	60	56.4	25.2	38.4	45.6	96	84	96	180		23	22	30	14	15	1.998	120	17.908	5.3835	11.0445	6.6045	8.0475	26.94	149.64	247.38	92.04	4	752.58	106.56		36	6.44584	A A
164	White	No	75.83	Female	158.9	60.2	23.8423	Yes	90	4.9395	4.884	3.996	2.22				32.88	29.28	47.1	458.16	91.98			458.16	90	6.2	22	17	50	43	29	2.109	60	7.21826	4.329	7.104	7.1595	7.437	20.58	122.7	179.22	182.64	4	608.558	89.0775	4.4	20	3.95959
165	White	No	67.3688	Female	162.56	63.1	23.8782	Yes	240	4.7175	4.3845	3.7185	3.1635	2.664	3.1635	3.3855	18.96	24.42	81.6	91.32		20.64	24.42			23	31	24				2.3865	120	3.97528	5.661	10.1565	10.2675	4.6065	99.48	597.96	642.48	79.8	4	681.817	2.4975			25.0292	G G
166	Black	No	41.8188	Female	158.5	60	23.8832	Yes	240	5.0505	4.8285	3.108	3.4965	3.4965	3.885	4.218	58.2	132	228	120				228	60	4.2	30	32	28	26	24	1.998	120	13.064	4.662	6.216	6.0495	5.328	9.36	211.8	107.46	70.86	4	506.993	0	4.8	29	1.93939	A A
167	White	No	69.9453	Female	159.5	61	23.9778	Yes	240	4.662	5.0505	4.329	3.441	3.108	3.3855	3.885	33	37.8	162	84	66	23.4	25.8	162	60		85	84	123	177	31	3.7185	120	6.8376	5.55	7.77	10.1565	8.4915	97.38	425.82	843.78	572.04	4	723.443	57.4425		76	24.0204	A A
168	White	No	33.8898	Female	156.1	58.51	24.0118	Yes	60	4.329	4.1625	2.664					11.34	17.28	57.9	18.84	16.44	14.28	14.46	57.9	60							3.552	60	2.18182									N/A						A A
169	White	Yes	22.9656	Male	184.75	82.1	24.0533	Yes	240	5.217	5.0505	3.108	3.3855	3.7185	4.1625	4.662	23.4	15.6	38.4	84	50.4	27	16.8	84	90		76	52				3.1635	120	5.42568	4.551	7.0485	7.0485	5.772	506.7	1218.12	1137.42	1064.34	4	558.607	12.4875		62	102.489
170	White	No	22.2154	Female	171	70.4	24.0758	Yes	240	4.9395	5.106	3.441	3.7185	3.774	4.107	4.329	39.78	49.56	94.44	89.28	215.88	53.16	41.1	215.88	120							2.331	90	8.73304	5.328	9.102	8.547	4.218	52.62	394.68	385.02	64.44	0	607.725	0			12.4604	G G
171	White	No	38.2705	Male	177.2	75.75	24.1243	Yes	240	4.551	4.551	4.329	3.663	2.331	2.997	3.663	41.88	20.04	10.2	71.58	136.08	68.52	85.26	136.08	120	8.9	13	11	16	13	20	2.553	180	8.47093	4.218	6.6045	5.9385	5.8275	33.66	249.84	141.36	213.48	3	525.307	19.1475	9.8	18	6.31013
172	Black	No	60.1656	Male	172.2	71.6	24.1461	Yes	60	4.4955	4.4955	3.3855					58.56	79.5	148.62	307.68	212.28	54.72	59.04	307.68	90	28	26	32				2.2755	90	11.7003	5.0505	8.2695	8.88	9.546	37.62	213.54	216.6	537.12	4	743.423	137.363	24	40	8.44444
173	Black	No	48.9593	Male	182.3	80.3	24.1625	Yes	60	4.4955	4.44	2.553					14.76	6.84	9.78	12	15.24	15.84	12.18	15.84	180	9.4	41	40	39	51	61			2.94905									N/A
174	White	No	26.5138	Male	188.4	85.9	24.2009	Yes	240	4.6065	4.4955	4.44	3.8295	3.8295	3.441	3.6075	90	372	204	108		120	60			16	33	26	63	42	28	2.9415	60	18.426	5.217	7.992	5.7165	6.327	35.04	451.32	220.5	242.4	4	593.572	0	12	25	8.12461	A A
175	White	No	55.1961	Female	172	71.6	24.2023	Yes	90	4.551	4.6065	3.3855	2.6085				11.22	20.64	31.26	14.46	24.42	20.4	19.08	31.26	60	63	35	31	34	29	23	4.329	180	2.26943	6.327	11.3775	12.3765	5.2725	150.72	850.02	695.52	293.52	4	780.053	20.8125	65	41	42.3825	A A
176	White	No	46.3143	Female	169.4	69.5	24.2191	Yes	240	5.328	4.7175	4.218	3.441	2.6085	3.441	4.1625	58.86	81.12	73.26	233.34	254.04			254.04	120	13	17	19	36	39	30	3.441	180	13.938	5.0505	6.993	8.0475	9.0465	16.32	210.42	140.16	218.46	4	677.655	71.595	9.4	33	3.6633	A A
177	Black	No	50.3858	Female	169	69.2	24.2288	No	0	4.107							23.4	110.88	99.3	64.32				110.88	30	6.8	16	13				2.109	90	4.27128	4.773	6.0495	4.662	5.661	7.2	228	114	132	4	492.84	0	4.1	5	1.52736
178	White	No	73.918	Male	187.25	85.1	24.2709	Yes	240	5.4945	5.6055	4.3845	3.108	3.6075	4.329	4.9395	55.8	37.2	330	132	51	22.2	46.2	330	60							1.998	60	13.6264	4.329	7.9365	8.9355	8.3805	54.78	498.48	662.7	538.92	4	688.477	168.997	26	74	10.5397
179	Black	No	49.0031	Female	177.5	76.5	24.2809	Yes	240	5.0505	5.106	4.884	4.4955	3.3855	3.33	4.107	62.7	17.7	105.54	2.88	75.96	29.22		105.54	60							3.2745	180	14.0741	5.217	6.7155	5.6055	5.106	21.96	153.42	152.94	96.48	4	516.983	0			5.09179	G A
180	White	No	69.655	Male	178.6	77.5	24.2962	Yes	120	4.662	4.6065	4.0515	3.219	2.3865			28.38	88.74	143.94	51.66	43.62	33.42	27.12	143.94	60	34	37	33	26			1.221	120	5.88034	5.217	9.102	8.0475	9.324	96	882			4	751.747	125.707	37	31	22.2592	A A
181	White	No	56.6116	Female	169	69.5	24.3339	Yes	240	5.3835	5.1615	3.552	2.886	3.1635	3.219	3.33	12.84	57.24	577.62	188.76				577.62	60							2.8305	120	3.07218	4.6065	6.8265	6.66	3.8295	11.04	161.04	195.78		4	488.678	0			2.26026	A A
182	White	No	23.48	Female	169.2	69.7	24.3462	Yes	240	4.329	4.3845	3.885	3.0525	3.2745	3.8295	3.885	57	57.6	78	264	120	46.8	54.6	264	90	8	19	14	17			2.4975	90	10.9668	4.218	5.8275	8.0475	10.0455	48.6	168	816	510	4	660.173	154.013	7.5	18	9.11088	G A
183	Asian	No	40.5102	Male	172	72.1	24.3713	Yes	240	5.106	4.773	4.44	3.33	3.108	3.6075	3.7185	40.2	108	348	336				348	60		17	18	34			3.2745	60	9.12272	4.662	5.55	7.2705	7.2705	11.22	54.66	117.36	91.02	4	563.602	4.1625		22	2.32478	A A
184	Asian	No	58.3474	Male	172.1	72.2	24.3767	Yes	90	4.8285	4.773	3.6075	2.442				18.6	36.54	88.44	49.86	22.08	14.88	24.66	88.44	60		27					3.3855	180	3.99156	6.7155	9.546	12.987	9.657	82.86	324.18	287.1	200.82	4	871.628	65.7675		23	24.7309	A A
185	White	No	77.64	Male	178.7	78.3	24.5196	Yes	60	5.1615	5.106	3.1635					30.3	20.52	75.36	56.64	49.98	25.02	11.52	75.36	60	12	52	38	74	53	63			6.95082									N/A						A A
186	White	No	49.1235	Male	172.2	73	24.6182	Yes	240	4.9395	4.7175	3.6075	2.9415	3.0525	3.219	3.1635	37.32	11.28	40.8	12.96	28.68	47.76	10.68	47.76	180	44	55	74	138	110	86			8.19298	5.55	7.7145	6.993	7.0485		619.68			4	631.035	0	110			A A
187	White	No	52.5213	Male	170.5	71.7	24.6644	Yes	240	6.327	6.105	6.1605	5.106	4.6065	5.0505	5.106	72	66	168	132	162	59.4	50.4	168	60	16	20	11				2.553	60	20.2464	5.1615	6.8265	5.328	5.4945	42.6	294	336	54	4	526.972	0	16	27	9.77244	A A
188	White	Yes	36.4551	Female	150.2	55.7	24.6897	Yes	240	5.328	4.995	4.107	3.2745	3.8295	4.218	4.4955	17.34	11.82	41.94	38.82	13.8			41.94	60	36	17	35	42	92	81	2.997	120	4.10611	4.1625	5.1615	5.1615	5.439	24.36	180.66	275.1	442.56	4	457.875	0			4.5066	G A
189	White	No	48.8279	Female	154.75	59.2	24.7207	Yes	180	4.773	4.9395	4.8285	4.6065	4.551	2.664		23.52	6.78	48.24	44.1	25.68	18.3	22.02	48.24	60	26.2						2.4975	90	4.98938	8.214	13.542	16.5945	11.877	84	366	678	564	4	1134.7	149.017			30.6656	G A
190	White	No	40.2389	Female	168.9	70.6	24.7483	Yes	60	4.3845	4.218	2.109																				3.441	60										N/A						A A
191	White	No	48.0775	Male	180.5	80.7	24.7696	Yes	240	5.106	4.884	3.6075	2.997	3.108	4.107	4.44	14.4	15.18	37.2	93.24	42.42	23.28	24	93.24	90	62.3	40	33	42	83	47	3.33	180	3.26784	6.3825	10.0455	12.543	14.0415	90	240	498	474	4	1006.49	240.592	48.7	32	25.53	G A
192	White	No	61.2031	Male	170.9	72.4	24.7887	Yes	120	4.6065	4.4955	4.3845	3.1635	2.3865			7.62	15.66	71.88	52.68	16.2	14.22		71.88	60	14	27	27	33	32	24	2.7195	90	1.56007	5.7165	12.654	13.3755	10.323	20.34	140.52	241.02	208.56	4	975.69	289.71	12	14	5.16772
193	White	No	68.9323	Female	173.5	74.8	24.8486	Yes	240	4.662	4.6065	4.3845	3.219	3.1635	3.774	4.0515	45.6	37.8	72	186	90	42.6	43.8	186	90	24	35	31	55	43	5	1.776	90	9.44832	5.106				51.6				4			17	18	11.7098	G A
194	Black	No	45.6572	Male	186	86	24.8584	Yes	240	5.106	4.9395	4.551	3.33	2.442	3.441	4.1625	84	90	132	156	204	66	53.4	204	120	35		59	53	70	78	2.6085	90	19.0624	5.7165	8.88	12.321	12.0435	37.14	118.02	202.62	227.16	4	898.267	212.287	23	57	9.43604	A A
195	More than 1 race	Yes	26.7	Female	161.2	64.7	24.8986	Yes	240	4.7175	4.551	3.219	3.33	3.3855	3.663	3.774	28.08	56.76	98.04	59.94	7.98			98.04	60		24	24	58	38	27	3.4965	180	5.88744	4.3845	4.9395	3.7185	4.1625	23.22	71.88	100.86	100.38	4	394.605	0		15	4.5248	A A
196	Black	No	46.2187	Male	176.75	77.8	24.9035	Yes	240	5.0505	5.0505	4.4955	3.33	3.552	3.9405	4.1625	15.48	2.4	6.96	13.44	17.28	1.08	1.68	17.28	120	9.2			39	25	23	2.3865	60	3.47474	4.995	5.2725	5.883	6.3825			82.14	15	4	512.82	0	8.2	30
197	White	Yes	24.9341	Male	176.4	77.5	24.906	Yes	240	4.773	4.2735	2.7195	3.108	3.1635	4.0515	3.7185	30.54	21.06	26.34	37.98	83.46	21.9	35.58	83.46	120	29	26	14	18	18	41	3.3855	180	6.47855	5.8275	8.4915	11.1	12.321	52.74	216.78	295.62	441.24	4	878.288	178.988	23	24	13.6597	G A
198	Black	No	43.8094	Female	167.5	69.9	24.9142	Yes	90	5.3835	5.2725	4.0515	3.0525				41.94	68.28	157.5	146.88	73.08	24.9	52.98	157.5	60	9.3	16	19	108					10.0348	5.328	7.437	7.2705	5.439	40.62	378.36	428.7	115.2	4	575.257	0	7.7	38	9.61882	G A
199	Asian	No	32.967	Male	166	68.7	24.931	Yes	240	4.995	4.6065	4.0515	2.3865	3.33	3.774	3.996	8.82	68.94	53.82					68.94	30		17	20				2.886	90	1.95804	4.773	7.2705	6.0495	4.884	12.54		282.66	51.42	4	526.972	0		27	2.66015	A A
200	White	No	69.4414	Male	174	75.5	24.9372	Yes	240	8.547	8.547	8.0475	7.0485	6.105	3.9405	4.8285	21.78	27.54	61.56	80.52	35.4			80.52	90	45	48	39				2.22	90	8.2735	4.7175	6.882	5.6055	3.441	21.24	223.08	79.74	9.54	4	464.535	0	15	30	4.45332	A A
201	White	No	46.2623	Female	161.4	65.1	24.9904	No	0	4.0515							91.08	85.74	75.9	98.46	101.64	309.54	109.86	309.54	180		41							16.4005	4.995	8.2695	9.768	7.3815	26.22	504.18	957.12	811.74	4	690.975	91.575			5.82084
202	White	No	78.0988	Male	179.9	81.1	25.0587	Yes	90	4.8285	4.8285	2.886	1.998				177.3	164.34	194.64	600.18	765.96	200.64	174.42	765.96	120	9.1	5	40				2.775	120	38.0486	4.3845	6.4935	6.105	5.994	27.72	181.92	254.28	175.44	4	531.967	5.8275	8.8	5	5.4017	G A
203	White	No	60.9485	Male	177.7	79.2	25.0813	Yes	240	5.3835	5.217	4.44	3.3855	2.9415	3.219	3.6075	44.1	38.58	103.08	223.56				223.56	90	7.7	17	20	28	49	33	1.9425	90	10.5517	4.6065	5.883	4.107	5.3835	11.22	173.46	121.32	142.92	3	468.697	0	8.2	12	2.29711	G A
204	Black	No	48.7595	Female	160.8	64.9	25.0999	Yes	60	4.8285	3.996	2.442					66.54	71.16	90.48	105.24	354			354	120							3.219	180	14.2795	4.44	5.661	5.0505	8.8245	18.48	83.4	95.22	180	4	576.923	44.1225			3.64672	A A
205	Asian	No	30.8644	Female	168	71	25.1559	Yes	240	5.9385	5.6055	4.662	3.663	3.219	3.8295	4.9395	25.2	78		144	108	54.6	33				23	12	11	33	18			6.65112	6.1605	9.768	10.656	9.99	58.02	300.78	317.7	405.36	4	844.987	105.727		21	15.8859	A A
206	White	No	19.1215	Female	169.3	72.2	25.1897	Yes	90	4.329	4.1625	2.886	2.109				26.94	34.2	182.28	112.08	55.98	40.98	42.6	182.28	60	7.7	38	29	63	42	39	3.108	180	5.18326	5.1615	5.3835	7.9365	6.438	53.58				4	551.115	0	7.6	34	12.2913	G A
207	Black	No	51.6669	Female	163.8	67.6	25.1953	Yes	240	5.439	5.106	4.329	3.3855	2.553	2.9415	3.4965	38.1	144.66	19.08					144.66	30			11		10	16	2.775	90	9.21004	4.2735	5.7165	4.6065	5.0505	12.96	204.24	142.44	178.86	4	456.21	0		13	2.46154	A A
208	White	No	59.8232	Female	180.25	81.9	25.2077	Yes	90	4.0515	4.773	3.774	2.8305				18.12	21.84	41.82	33.78	26.4	10.62	19.08	41.82	60		32	23	31	31		2.997	90	3.26281	5.4945	10.767	10.989	7.77	183.12	1174.26	436.02	1159.44	4	803.363	144.023		35	44.7179	A A
209	White	No	62.4269	Female	158	63	25.2363	Yes	90	5.3835	5.1615	3.996	2.4975				58.68	66	135.48	91.74	66.6	35.1	27.9	135.48	60							2.8305	120	14.0402	5.9385	10.101	7.437	4.9395	76.02	530.16			4	651.848	0			20.0642	A A
210	Asian	No	64.3601	Male	165.2	69	25.283	Yes	120	4.995	5.0505	4.4955	3.2745	2.886					28.68	51.66	33.72	24.9	17.16			24	23	24	23	23	23	3.552	120		5.217	8.325	10.8225	12.7095	330	354	360	46.8	4	871.628	245.588	20	26	76.516	A A
211	White	No	22.3442	Male	176.9	79.2	25.3087	Yes	240	4.218	4.1625	4.107	3.4965	2.8305	2.886	3.4965	17.82	25.08	30.3	286.26	292.26	88.2		292.26	120	8.7	31	30	45	41	61	3.996	90	3.34066	4.773	5.1615	6.0495	6.216	22.38	55.5	103.86	123.66	4	503.663	0	6.8	29	4.74754	G A
212	White	Yes	47.5959	Female	155.2	61	25.3248	Yes	240	4.662	4.7175	4.4955	4.3845	4.329	3.996	2.7195	12.06	7.38	11.22	15.54	16.62	52.14	22.32	52.14	180		26	24	28	25	29	2.3865	120	2.49883	6.438	9.546	13.542	14.43	99.36	191.7	322.62	39.06	4	1018.98	246.42		31	28.4302	A A
213	unknown or not reported	Yes	54.1366	Male	170	73.3	25.3633	Yes	120	5.8275	5.7165	5.439	4.9395	4.44								31.02					33	28				3.2745	120		4.6065	6.2715	6.105	6.2715	24.6	273.48	377.82	273.6	4	536.962	0		28	5.03644	G A
214	Asian	No	27.38	Male	179.2	81.7	25.4417	Yes	240	4.7175	4.884	3.108	2.9415	3.663	3.885	4.6065	135.66	106.02	140.1	120.18	89.4	122.76	118.92	140.1	60	16	51	37	65	44	15	3.108	90	28.4434	4.773	6.1605	6.9375	8.103	26.76	476.46	476.16	311.22	4	603.562	30.8025	12	25	5.67669	G A
215	White	No	52.6664	Male	185.5	87.6	25.4575	Yes	240	5.55	5.217	4.884	4.329	4.0515	3.6075	3.6075	55.32	63.42	104.22	191.16	117.9	83.52	73.26	191.16	90		26	18	24			4.773	240	13.6456	4.995	7.881	6.771	7.8255	31.2	520.44	123.84	155.28	4	647.685	48.285		26	6.9264	A A
216	Asian	No	43.9023	Male	161.5	66.4	25.4579	Yes	240	4.662	4.8285	4.3845	3.2745	3.8295	3.996	4.44	18.84	268.74	80.7					268.74	30	24	29	24	24	33	41	3.6075	240	3.90365	6.0495	9.3795	9.213	7.326	10.2	263.88	171.9	49.98	4	730.103	4.1625	22	26	2.74244	A A
217	Asian	No	68.6775	Male	166.6	70.7	25.4724	Yes	240	5.6055	5.3835	4.6065	3.8295	3.1635	3.663	3.9405	5.82	76.44	60.84	31.26	33.12	17.7	26.1	76.44	30	57	40	38	50	53	39	3.6075	240	1.44996	5.55	11.2665	12.543	6.327	94.98	462.48	689.16	230.76	4	799.2	133.2	28	58	23.4284	A A
218	White	No	24.77	Female	160.8	66	25.5254	Yes	90	5.106	4.6065	3.6075	2.6085				82.86	52.68	99.54	452.88	207.48			452.88	90	4.8	46	45				2.553	120	18.8037	4.3845	6.8265	6.216	5.2725	19.2	264	246	120	0	521.977	0	5.1	19	3.74144	A A
219	White	No	36.7839	Female	162.3	67.3	25.5492	Yes	90	5.328	4.884	3.441	2.0535						89.88	39.06	62.1						16	15				2.775	120		4.662	7.2705	7.9365	4.9395	19.56	121.62	147.78	54.12	4	555.278	0		31	4.05283	G G
220	White	No	26.2209	Female	168.91	73	25.5866	Yes	240	4.3845	4.4955	3.0525	2.6085	2.9415	3.108	2.9415	36.12	17.64	112.92	136.44	120	71.34	32.94	136.44	90	27	21	17	16	28	24	4.7175	60	7.03858	6.0495	8.1585	10.8225	12.1545	59.52	153.72	325.08	687.48	4	862.47	136.53	19	20	16.0029
221	White	No	38.7141	Male	174	77.6	25.6309	Yes	240	4.2735	4.329	2.997	2.331	2.886	3.219	3.33	102	90	114	360	252	198	108	360	90	9.6	20	18	22	56	24	2.7195	90	19.3732	4.6065	4.7175	5.6055	5.3835	28.8	138	87	132	4	456.21	0	9.3	11	5.89632
222	Black	No	42.7578	Male	175.4	79	25.6784	Yes	60	4.662	4.1625	2.7195					16.38	20.76	25.26	17.16	8.7	10.44	16.08	25.26	60							3.33	180	3.39394									4						A A
223	White	No	76.5465	Female	165.1	70	25.6805	No	0	5.217							16.44	16.92	7.8	64.98	48.12			64.98	90							3.0525	60	3.81189	4.773	5.772	4.1625	5.328	19.86	212.52	179.22		1	467.033	0			4.21297	A A
224	White	No	55.5851	Male	171.45	75.5	25.6846	Yes	180	5.0505	5.2725	4.6065	4.6065	4.8285	3.774		18	21.54	75.6					75.6	60		11	17	10	5	26	3.0525	90	4.0404	4.662	6.8265	6.7155	4.44	13.2	144	198	42.6	4	508.658	0	6	5	2.73504
225	White	No	35.352	Male	173.7	77.5	25.6863	Yes	240	5.0505	4.662	4.6065	4.107	3.219	3.2745	3.6075	10.86	7.32	13.26	21.96	22.32	18.6	7.5	22.32	120	89	54	53	33	45	5	2.886	120	2.43771	7.4925	9.8235	11.988	11.433		690	1002	1140	4	929.903	30.8025		16		A A
226	White	Yes	25.468	Female	157.5	63.9	25.7596	Yes	90	4.2735	4.218	3.9405	1.776				76.26	121.98	494.88	169.32	62.64	67.26	63.48	494.88	60	29	29	33	61	45	54	3.2745	120	14.4843	5.217	8.0475	9.0465	6.9375	33.84	307.68	345.3	129.24	4	663.503	37.4625			7.84637	G A
227	Black	No	19.7403	Male	176.75	80.6	25.7998	Yes	240	4.551	4.7175	4.551	3.9405	4.107	4.4955	4.107	27.48	45.24	403.62	86.16				403.62	60		34	31				1.776	90	5.55829	4.551	6.993	7.1595	6.882	8.52	122.7	197.7	222.96	4	591.908	45.7875		15	1.72331	A A
228	White	No	19.8607	Female	163.4	68.9	25.8057	No	0	4.1625							75.24	86.58	81.36	94.68	128.94	170.1	140.34	170.1	180	11	10	19	30	23	20	1.443	60	13.9194	5.4945	6.216	7.548	7.992	22.68	145.86	145.74	199.32	4	621.877	0	13	15	5.53846
229	White	No	67.4017	Male	180.3	83.9	25.809	Yes	240	4.8285	4.4955	3.441	2.4975	2.886	3.3855	3.552	42.72	123	101.22	28.14				123	30	11	37	42	54		42	3.3855	180	9.16771	6.216	14.985	12.9315	7.1595	3.42	14.1	79.56	7.56	4	951.548	205.628	9.2	39	0.944832	A A
230	White	Yes	22.75	Female	160.6	66.8	25.8991	Yes	120	4.662	4.551	4.0515	3.108	2.3865								25.86				17.5						3.219	60		5.4945	7.215	8.658	9.657	21	204	222	198	4	718.447	59.1075			5.1282	G A
231	White	No	78.2684	Male	177.9	82	25.9097	Yes	240	5.883	5.4945	4.884	4.329	3.8295	3.4965	3.996	15.06	33.12	44.16	127.14	63.9	33.72	37.56	127.14	90	21.8						2.775	120	3.93769	6.0495	10.878	12.987	12.987	49.8	22.8	50.4	66	4	1001.5	275.558			13.3896	A A
232	White	No	52.34	Female	173	77.6	25.928	Yes	120	4.773	4.884	4.4955	3.663	2.8305			24.54									15	18	27	47	56	35	2.7195	120	5.20575	4.4955	5.4945	5.328	5.661	17.34	100.08	79.38	121.08	4	482.018	0	7.7	16	3.46453	A A
233	White	No	45.5698	Female	160	66.4	25.9375	Yes	240	5.328	6.0495	5.3835	5.1615	4.3845	4.0515	4.2735	52.2	72.6	72	92.4	126	90	44.4	126	120		12					2.331	90	12.361	4.44	5.6055	7.1595	4.0515	55.92	162.72	574.02	66.18	4	463.703	0		15	11.0349	G G
234	White	No	52.9458	Male	174	78.6	25.9612	Yes	240	5.2725	5.217	4.884	3.6075	2.9415	4.1625	4.773	84	96	27.6	57.6				96	30	11	24	16				2.664	120	19.684	4.0515	8.3805	9.7125	8.8245	7.2	132	168	192	4	722.61	236.43	4.3	5	1.29648	A A
235	White	No	71.6457	Female	154.94	62.5	26.0347	Yes	240	5.661	5.4945	4.662	3.3855	2.886	3.2745	3.33	12.72	30.06	12.12	54.9	45.6	58.14	31.68	58.14	180	66	121	121	109	150	227	2.331	120	3.20035	4.2735	5.7165	8.6025	5.883	87.72	530.28	1236.36	684.18	4	541.125	28.305	100	83	16.661	A A
236	White	No	31.6394	Male	184	88.2	26.0515	Yes	240	4.662	4.4955	3.774	3.219	3.885	4.1625	4.551	36.3	32.76	83.04	52.44	49.44	29.04	25.56	83.04	60	25.6						3.1635	180	7.52136	6.549	7.437	7.8255	8.4915	84	150	156	222	3	693.473	0			24.4496	A A
237	White	No	80.6778	Male	165.3	71.2	26.0576	Yes	240	6.4935	5.9385	4.3845	2.8305	2.997	3.4965	3.996	61.56	86.88	307.98	164.94	111.6	72.06	61.5	307.98	60		24	28	34	41	54			17.7662	4.6065	7.0485	7.104	4.329	39	226.86	380.82	110.94	4	516.983	0		29	7.9846
238	White	No	61.2579	Female	190	94.1	26.0665	Yes	240	4.9395	4.884	4.8285	4.44	3.3855	3.3855	3.663	9.48	9.9	107.64	9.84	6.3	18.96	19.26	107.64	60							2.331	90	2.08118	7.104	10.6005	12.0435	13.098	128.1	187.74	174.78	319.44	0	998.168	145.688			40.4454
239	Black	Unknown	50.528	Male	181.7	86.1	26.0791	Yes	240	8.436	7.77	7.437	6.216	5.661	5.2725	6.9375	48.72	40.74	49.38	57.72	44.58			57.72	90	11	15	14	32	24	18	2.331	90	18.2668	5.3835	7.215	8.88	5.772	18	102	150	144	4	603.562	0	5.8	13	4.3068	A A
240	White	No	27.0806	Male	169.5	75	26.1049	Yes	240	5.439	5.328	4.773	3.552	3.8295	4.4955	5.55	79.26	103.8	931.5					931.5	60		112					3.3855	180	19.1598	4.662	8.7135	8.547	3.3855	15.9	478.32	540.48	52.68	4	561.105	1.665			3.29448	A A
241	White	No	63.2237	Male	167.8	73.5727	26.1296	Yes	240	5.9385	5.7165	4.4955	3.2745	2.6085	3.33	3.885	54.54	59.82	230.34	132.6	100.32			230.34	60			12				3.219	120	14.3949	4.218	6.216	6.3825	5.328	20.7	453.72	309.66	120.36	4	505.328	0		26	3.88056	A A
242	White	No	29.24	Female	166.1	72.1	26.1334	Yes	240	4.551	4.7175	3.996	3.885	3.6075	3.6075	3.6075	24.18									8.6		14	13	23	17	2.7195	180	4.89081	5.1615	8.3805	9.657	7.8255	15.12	120	129.84	107.64	4	708.457	89.0775	5.5	13	3.46853	G A
243	Asian	No	41.6161	Female	160	67	26.1719	Yes	240	5.328	5.439	4.884	3.4965	4.0515	4.1625	4.662	7.5	8.28	21.3	20.64	23.52	10.62	9.84	23.52	120							3.2745	180	1.776	5.4945	10.1565	8.991	5.4945					1	686.812	27.4725				A A
244	White	Yes	44.6307	Male	172.2	77.7	26.2032	Yes	240	3.9405	3.9405	3.774	3.774		2.886	3.0525	29.7	32.64	29.88	81.36	99.18			99.18	120		45	33	71	49	31	3.1635	180	5.20146	4.3845	7.326	7.4925	5.6055	20.16	225.48	205.32	70.08	4	566.1	39.96		43	3.92851
245	Unknown or not reported	Yes	39.5873	Male	175.5	80.8	26.2336	Yes	240	4.6065	4.6065	4.2735	3.33	3.0525	2.22	3.7185	58.14	51.78	90.12	71.22	72.66	56.1	38.94	90.12	60	14	17	14	14	15	16	2.2755	90	11.9032	6.7155	5.6055	6.105		43.68	230.58	89.04	35.7	0			23	15	13.037	A A
246	White	No	63.744	Male	165	71.5	26.2626	Yes	240	5.0505	4.7175	3.996	3.1635	4.0515	3.4965	3.885	60	55.2	468	144	66	46.8	55.8	468	60		26	33	62			3.1635	90	13.468	4.884	6.6045	6.327	5.9385	41.1	334.02	272.52	262.14	4	544.455	0		44	8.92144	A A
247	White	No	59.1059	Male	170	76.1	26.3322	Yes	240	6.2715	5.772	4.6065	3.4965	2.9415	3.3855	3.774	32.46	49.74	109.44	49.26	33.3	15.66	17.88	109.44	60		40	50	39	52	56			9.04768	6.1605	9.99	10.989	10.212	254.28	700.32	697.8	712.02	4	863.303	124.043		40	69.6219	G A
248	White	No	57.0087	Male	173.2	79	26.3349	Yes	240	4.8285	4.6065	4.551	3.663	2.553	3.1635	4.0515	78	90	426	180	96	72	78	426	60	37	24	13	27	24	46	2.775	120	16.7388	4.773	6.327	5.7165	5.106	31.56	163.14	121.98	249.96	4	500.333	0	30	31	6.69493	A A
249	White	No	62.6024	Male	173.4	79.3	26.3739	Yes	120	5.439	5.4945	5.106	4.773	4.0515			18.48	17.7	22.98	60.78	46.26	30	20.82	60.78	90							2.997	90	4.46723	4.9395	9.546	10.0455	7.4925	155.7	384.96	1058.94	512.28	2	735.93	143.19			34.1813	A A
250	White	No	27.3681	Female	153.9	62.5	26.3878	Yes	240	4.44	4.551	4.329	4.218	3.9405	3.2745	2.8305	42.84	54	143.88	63.6				143.88	60				18	22	19	2.8305	120	8.45376	5.2725	7.659	9.435	8.4915	6.48	13.74	16.5	316.68	4	705.128	72.4275		11	1.51848	G G
251	White	No	23.3022	Female	151	60.2	26.4024	Yes	240	5.0505	4.7175	4.1625	3.33	3.1635	2.886	3.4965	11.16	48.6	20.4					48.6	30							2.664	180	2.50505	4.6065	6.2715	7.7145	5.8275	12.36	57.54	140.4	257.94	3	547.785	0			2.5305	G A
252	White	Yes	69.5044	Male	175.6	81.5	26.4307	Yes	240	6.9375	7.104	6.882	6.66	6.1605	5.6055	5.106	63.36										13	14	15	21	19	3.1635	120	19.536	4.3845	5.2725	4.3845	6.4935	17.28	186.36	114.48	160.14	4	484.515	0		24	3.3673	G A
253	Black	No	25	Male	173	79.2	26.4626	Yes	60	4.551	4.107	1.998					12.9	28.5	8.04	2.1	2.1	1.86	1.56	28.5	30							3.33	90	2.60924									0						G A
254	White	No	26.4399	Female	167	74	26.5338	Yes	240	4.7175	4.3845	1.776	3.663	3.4965	3.774	3.996	21	34.8	90	192	53.4	366	28.8	366	180	94	64	51	60	67	52	3.2745	180	4.403	6.327	10.1565	12.432	9.7125	66.72	269.22	390.78	263.94	4	877.455	118.215	63	52	18.7617	A A
255	Black	No	51.8998	Female	166	73.2	26.5641	Yes	120	4.329	4.8285	4.329	3.552	1.998				938.52	587.7	117.84	94.74			938.52	30	19	24	37				3.774	120		4.218	5.0505	4.0515	3.2745	21.06	141.42	73.5	42.84	4	373.793	0	12	30	3.94805	A A
256	White	No	49.7724	Female	164.9	72.4	26.6255	Yes	240	6.6045	6.66	4.8285	3.33	3.108	4.6065	4.9395	40.2	43.2	226.14	93.84	40.32	36.36	35.1	226.14	60							3.663	180	11.8	5.6055	5.994	3.885	4.44	56.7	471.96	204.06	119.16	2	455.378	0			14.1259	A A
257	White	No	19.99	Female	162.4	70.3	26.6553	Yes	90	4.218	4.2735	3.2745	2.0535				73.2	87.12	223.68	148.92	118.02	67.02	62.1	223.68	60		72	67	182			2.3865	60	13.7226	4.7175	6.993	5.217	5.439	37.74	338.22	147.24	110.82	4	521.977	0		39	7.91282	A A
258	Black	No	31.2587	Male	161	69.1	26.6579	Yes	240	4.551	4.773	4.7175	4.4955	4.6065	4.662	3.1635	114	156	318	318	120	72	72	318	60	15	12		12	14		3.3855	240	23.0584	5.4945	6.882	8.3805	7.548	29.1	83.88	115.38	162.84	4	641.025	0	13	11	7.10622	A A
259	White	No	74.3697	Male	171	78	26.6749	Yes	240	6.105	6.438	6.1605	5.8275	5.328	3.663	3.552	61.56	141.66	243.6	245.52	230.76	143.34	81.12	245.52	90	14	38	23	72	66	39	2.2755	90	16.7033	4.773		6.9375	4.3845	30.6		540	120	2			10	27	6.49128	A A
260	White	No	25.8294	Male	173.5	80.3	26.6757	Yes	240	5.0505	4.995	4.44	3.108	4.0515	4.107	4.218	27	126	66	52.2	25.8	10.2	25.2	126	30		59	52	53	57	79	3.2745	120	6.0606	6.0495	8.9355	10.545	10.0455	91.26	343.38	701.64	890.1	4	818.347	92.4075		50	24.5368	A A
261	White	No	71.8236	Male	172.7	79.6	26.6888	Yes	240	8.991	8.547	8.0475	6.771	5.55	4.4955	4.6065	13.98	27.12	57.36	42.9	144.66			144.66	120	13	15	5	23	16	11	2.553	90	5.58641	4.8285	7.881	5.6055	4.218	17.7	137.7	164.22	52.14	4	519.48	0	12	12	3.79842	A A
262	White	Yes	36.2662	Female	164.9	72.6	26.699	Yes	240	4.773	4.6065	3.9405	3.1635	2.997	3.7185	3.8295	9.78	9.9	23.94	19.14	7.86	6.12	4.68	23.94	60	7.6	27	25	54	41	37	3.774	240	2.07466	4.662	7.77	6.438	5.55		111.3	387.06	20.64	4	566.1	6.66	4.7	28		A A
263	White	No	47.9599	Male	178	84.8	26.7643	Yes	240	10.878	9.6015	8.4915	6.882	5.7165	3.996	5.0505	41.04			164.28	262.14											2.331	90	19.8415	4.218	5.106	5.4945	4.4955	19.5	75.12	77.58	34.8	4	433.732	0			3.6556
264	White	No	61.29	Male	177.2	84.2	26.8154	Yes	240	4.8285	4.4955	4.1625	3.885	3.441	3.219	3.8295	44.4	26.4	120	138	45	66	57	138	90	31	30	36	48	68	53	3.108	90	9.52824	5.7165	7.1595	10.8225	9.7125	34.5	203.46	540	245.1	4	754.245	68.265	23	39	8.7653	A A
265	White	No	58.1531	Female	152.5	62.5	26.8745	Yes	240	5.2725	4.995	4.6065	3.2745	2.8305	3.885	4.773	234	174	198	192	168	288	246	288	180							3.552	120	54.834	4.773	7.326	7.659	6.9375	24.78	179.4		151.68	4	614.385	41.625			5.25666	G A
266	White	No	45.671	Male	173.7	81.1	26.8795	Yes	240	9.768	9.324	8.436	7.3815	6.438	4.773	4.4955	187.32	52.14	240.9	358.44	117.36	80.64	39.18	358.44	90		45	36	55	51	84	2.997	120	81.3219	3.996	5.8275	7.215	5.4945	72.9	470.52	455.88	258.72	4	507.825	28.305		39	12.947
267	White	No	52.2528	Male	186.8	93.8	26.8812	Yes	60	4.884	4.773	3.4965					11.64	27.78	56.76	28.8	13.92	11.34	11.22	56.76	60	37	42	42	41	41	29	3.4965	60	2.52666									N/A
268	White	Yes	55.2619	Female	161	69.9	26.9666	Yes	90	4.1625	4.218	3.219	2.1645				100.68	85.14	174.24	144.66	130.02	85.56	49.62	174.24	60	68	176	156	129	140	185	2.4975	90	18.6258	5.9385	10.212	12.654	7.2705	37.5	294.24	240.66	153	4	803.363	90.7425	40	81	9.8975
269	Black	No	28.8767	Male	169.5	77.7	27.0447	Yes	240	4.218	4.3845	4.0515	3.996	4.0515	4.1625	4.0515	40.44	14.76	16.92	25.26	32.34	26.58	18.72	40.44	0	150	16	18	23	35	24	3.774	240	7.58115	6.771	8.4915	14.3745	8.436	150	894	672	576	4	825.007	12.4875	33	15	45.14	G A
270	Black	No	48.8443	Male	172.3	80.3	27.0486	Yes	240	5.1615	5.1615	3.4965	2.7195	3.663	4.107	4.2735	71.04	48.84	308.28	91.8				308.28	60	4.8	13	33	30	34	50	2.2755	90	16.2966	4.662	5.106	4.4955	4.773	8.4	144	156	96	4	433.733	0	4.3	5	1.74048	G A
271	White	No	58.25	Male	187.8	95.5	27.0777	Yes	240	5.439	5.439	5.1615	4.995	4.107	3.33	3.885	20.4	27	66	114	120			120	120	27	32	43	46	34	60	2.997	90	4.93136	4.4955	5.772	5.661	3.8295	19.08	105.96	151.38	110.46	4	440.392	0	29	17	3.81218	A A
272	Black	No	45.2247	Female	160.2	69.5	27.0807	Yes	60	5.0505	4.884	4.7175					19.74	14.7	12.3	16.44	27.48	29.76	11.4	29.76	180							3.2745	60	4.43097									N/A						A A
273	White	No	49.107	Male	162.4	71.5	27.1103	Yes	240	4.8285	4.884	3.108	2.7195	3.2745	3.7185	4.1625	51	66.36	87.66	107.1	110.82			110.82	120	10	32	45				8.2695	240	10.9446	3.996	6.438	4.995	5.55	21.72	225.36	107.58	96.72	4	494.505	14.985			3.85747	A A
274	Black	No	41.7313	Female	179	86.9	27.1215	No	0	3.996							53.04	65.7	65.28	84.36	468.36	25.62	24.6	468.36	120	55	46	35	27	41	40	2.331	60	9.4199	4.884	6.6045	8.103	7.326	114.72	299.94	561.18	462.72	4	612.72	26.64	43	27	24.9019	A A
275	White	No	69.27	Male	173.5	81.7	27.1408	Yes	240	5.7165	5.8275	5.7165	5.439	5.217	3.774	3.441	45.78	42.66	45.36	38.64	57.24	57.9	41.7	57.9	180	11.5	46	40	44	102	89	2.997	180	11.6312	4.9395	8.991	10.7115	8.547	56.4	384	618	654	0	760.905	168.165	11	34	12.3817
276	Black	No	43.0729	Female	168	76.7	27.1755	Yes	240	4.884	5.106	4.4955	3.885	3.9405	3.885	3.3855	56.4	55.8	198	180	144	60	43.2	198	60	14	5	5	5	5	24	2.7195	60	12.2426	5.661	10.101	11.322	10.9335	46.98	220.44	313.44	442.68	4	885.78	206.46	16	15	11.8202	A A
277	White	No	28.989	Female	163	72.4	27.2498	Yes	240	4.218	4.218	3.996	3.4965	1.7205	3.0525	3.8295	76.44	79.86	295.8	211.08	196.26	83.58	58.2	295.8	60	59	44	23	76			3.33	240	14.33	4.44	6.438	5.55	4.8285	43.8	540.12	304.5	207.12	4	487.845	0	21	26	8.6432	A A
278	Black	No	52.6279	Male	182	90.6	27.3518	Yes	240	5.1615	4.44	3.219	3.552	4.2735	4.9395	4.551	43.38	100.98	116.4	103.74	81.6	50.04	31.26	116.4	60	22.7						2.8305	90	9.95137	5.8275	8.547	9.9345	7.7145	66	180	372	642	4	724.275	24.975			17.094	A A
279	Black	No	45.2494	Male	180	88.7	27.3765	Yes	0	4.9395	4.884						30.66	23.34	90.96	72.06	34.38	29.88	46.32	90.96	60		64	81	139	82	88	6.327	180	6.73089	4.2735	5.883	5.6055	6.0495	54.96	614.7	306.42	422.04	4	506.16	0		39	10.4387
280	White	No	65.6741	Female	157.3	67.8	27.4014	Yes	60	5.0505	4.884	2.775					59.04	44.58	291.12	150.12	89.16	37.02	19.62	291.12	60	66			46	23	28	3.552	240	13.2525	5.6055	9.1575	10.323	10.656	162	180	642	606	0	833.332	160.673			40.3596	A A
281	Asian	No	32.1293	Male	180.6	89.4	27.4096	Yes	90	4.4955	4.44	3.0525	3.108				108.72	114.06	440.22	295.26	129.6	52.08	45.96	440.22	60	14	36	40	46			2.8305	240	21.7223	5.2725	7.215	7.548	6.216	45.6	326.28	360.3	222.12	4	595.237	0	22	31	10.6856	A A
282	White	No	41.8052	Female	162.6	72.5	27.4219	Yes	60	4.884	4.884	3.0525					8.46	11.94	13.74	15.72	12.84	10.5	12.18	15.72	90	17	28	26	50	30	17			1.83638									N/A
283	White	No	78.7614	Male	170.2	79.5	27.444	Yes	120	5.4945	5.328	4.773	3.4965	2.775			18.6	20.88	96.6	82.56	44.04	36.24	22.74	96.6	60	32	40	20	28	39	28	3.219	120	4.54212	4.662	7.992	5.55	5.883	126.36	970.44	880.32	7.26	4	569.43	9.99	34	34	26.1818	A A
284	White	No	64.1382	Female	152.8	64.1	27.4544	Yes	90	5.7165	5.217	3.9405	2.9415				19.32	34.5	55.5	26.52				55.5	60		14					3.3855	240	4.90857	4.8285	7.437	8.1585	7.7145	2.76	29.76	325.08	541.08	4	649.35	69.93		20	0.592296	G A
285	Asian	No	35.538	Female	158.5	69	27.4657	Yes	240	5.3835	5.1615	4.995	4.662	4.329	2.8305	4.107	42	60	144	45	36.6	33.6	28.2	144	60	35	34	20	51	12	22	4.1625	180	10.0492	5.106	6.66	7.1595	5.9385	85.14	453	582.6	241.2	4	561.938	0	41	53	19.3211	A A
286	Asian	No	20.34	Female	161.3	71.5	27.4813	Yes	240	4.44	4.329	4.329	3.9405	3.3855	3.108	2.9415	30.9	13.68	40.92	52.08	96.12	49.62		96.12	120					20	18	3.219	120	6.0976	5.3835	7.6035	7.1595	5.8275	20.34	108.18	340.26	333.66	4	591.075	0		14	4.86668	A A
287	White	No	84.5629	Female	152	63.5	27.4844	Yes	240	5.9385	5.4945	5.106	4.218	3.33	3.441	4.0515	13.08	11.46	30.3	33.42	54.3	37.38	10.92	54.3	120	12.8						3.885	180	3.45225	6.438	7.4925	8.325	5.772					4	619.38	0				A A
288	White	No	46.8	Female	172.2	81.6	27.5184	Yes	240	5.1615	4.9395	3.996	3.1635	3.441	4.2735	4.3845	120	72	84	132		180	84									2.109	90	27.528	4.44	6.105	6.66	6.438	32.52	162.96	190.5	373.86	4	542.79	9.99			6.41728
289	White	No	53.6382	Male	172	81.5	27.5487	Yes	60	5.772	4.551	2.1645																				3.9405	180										0						A A
290	White	No	64.5353	Female	165.5	75.5	27.5646	Yes	90	5.0505	4.995	4.218	2.442				47.46	52.5	179.52	119.28				179.52	60	3.3	30					3.996	240	10.6532	4.995	5.883	5.3835	6.3825	8.7	317.82	178.86	109.86	4	523.643	0	5.6		1.9314	A A
291	White	No	35.06	Male	179.4	88.8	27.591	Yes	60	5.0505	4.995	2.7195					6.42	6.9	16.74		17.52	15.18	12.42			14		13	19	36	27	2.1645	90	1.44108									N/A						G A
292	Black	No	47.7328	Male	190	99.7	27.6177	Yes	240	4.7175	4.9395	4.662	3.996	3.6075	3.6075	3.9405	53.4	144	198	102	31.8	32.4	46.2	198	60		76	55				2.9415	120	11.1962	4.3845	8.547	8.4915	6.2715	54.06	561.42	597.78	240.78	4	637.695	111.555		38	10.5345	A A
293	White	No	49.0469	Female	164.2	74.5	27.6319	Yes	240	4.3845	4.773	4.0515	3.3855	2.9415	3.3855	2.775	42.18	327.48	378.24					378.24	60		5.5					3.552	180	8.21948	4.4955	6.105	5.328	4.7175	16.08	220.62	154.56	119.34	4	472.028	0		6.6	3.21278	G A
294	White	No	79.6182	Male	188.2	97.9	27.6403	Yes	240	6.882	6.4935	5.106	3.8295	2.886	3.996	4.218	17.46	11.82	14.04	8.52	23.94	13.02		23.94	120	12	5	27	5	35	21	2.886	180	5.34043	4.329	3.774	4.2735	4.218	26.88	83.52	217.38	67.74	4	368.798	0	9.5	12	5.17171	A A
295	Black	No	51.2481	Male	172.5	82.3	27.6581	Yes	240	4.884	4.551	4.8285	4.4955	3.774	3.774	3.774	163.2	131.94	372.54	607.32	492.48	179.4	149.04	607.32	90	23	35	37	66	40	36	3.4965	240	35.4253	5.2725	7.437	7.659	8.1585	23.52	112.08	104.4	122.76	4	661.837	29.1375	16	26	5.51152	A A
296	White	No	30.6973	Male	168	78.2	27.7069	Yes	120	5.3835	5.0505	4.7175	4.995	4.4955				19.38	41.58	111.36	29.76	27.54	22.5	111.36	90	11.5						3.1635	60		5.7165	7.9365	9.3795	10.8225	108	312	408	786	4	789.21	103.23			27.4392	A A
297	White	No	56.2283	Male	179.1	88.9	27.7147	Yes	240	5.2725	5.106	4.218	2.7195	2.7195	3.552	4.3845	10.26	23.04	106.8	4.74	5.64	13.32	5.58	106.8	60							2.8305	60	2.40426	5.106	7.659	6.66	7.437		154.92		172.44	4	629.37	16.65				G A
298	White	No	54.5446	Female	167.8	78.1	27.7375	Yes	240	5.3835	5.2725	4.551	3.1635	3.2745	3.663	3.9405	19.8	14.4	19.8	46.8	49.8	13.8	33	49.8	120	26	11	14	13	38	33	2.1645	120	4.73748	5.55	7.6035	7.881	7.4925	64.8	507.9			4	654.345	0	23	19	15.984
299	White	No	39.2068	Female	154.3	66.1	27.7632	Yes	60	4.4955	4.884	2.3865								65.94		24.78	15.84			6.4	19	18	21	24	17	2.3865	90										4						A A
300	White	No	46.4759	Male	175	85.2	27.8204	Yes	240	5.9385	5.439	3.885	2.775	3.33	4.1625	4.3845	84	84	126	168	162	48	58.8	168	90	12						2.9415	120	22.1704	5.0505	7.77	7.437	7.326	37.92	236.82	162.72	204.96	4	640.193	34.1325	17		8.51178
301	White	No	76.8777	Male	172.9	83.3	27.8647	Yes	240	5.328	5.2725	4.3845	3.4965	2.6085	3.2745	4.218	78	89.82	144.96	47.82				144.96	60	6.8	5	5	18	11	5	3.552	180	18.4704	4.1625	6.6045	7.215	5.2725	6	39	162	114	4	526.973	27.4725	3.2	5	1.11
302	White	No	53.1072	Female	156.5	68.3	27.8864	Yes	240	4.6065	4.218	2.886	2.3865	2.886	3.4965	3.6075	25.68	117.78	140.46	54.18	22.02	22.62	32.58	140.46	60	39	64	74	63	68	69	4.995	180	5.25755	4.773	7.548	8.3805	8.325	78	108	594	360	4	673.492	100.732			16.5464	G A
303	White	No	62.69	Male	170.1	80.9	27.9602	Yes	240	4.773	4.9395	4.3845	3.4965	1.998	3.4965	3.8295	52.92	44.94	162.48	88.86	51.54	53.94	49.32	162.48	60							3.108	60	11.2261	6.1605	10.0455	12.0435	8.547	36.6	270	258	216	4	830.835	91.575			10.0211	A A
304	White	No	24.9724	Female	177.2	88	28.0256	Yes	240	4.4955	4.3845	3.7185	1.887	2.9415	3.885	3.996	37.14	16.62	19.5	27.06	65.64	100.14		100.14	180	7.7	18	14	12	21		2.997	120	7.42057	4.7175	7.548	7.881	7.104	22.26	314.82	276.42	118.68	4	628.538	62.4375	4.6	11	4.66718	A A
305	White	No	54.6816	Male	183.8	94.7	28.0323	Yes	60	4.551	4.44	3.0525					24.12	152.88	87.72					152.88	30			16	30	16	10	2.7195	90	4.87867	4.884	6.8265	5.0505	4.4955	12.66	192.66	149.22	78.06	4	488.678	0		12	2.74806
306	White	No	57.852	Male	174	84.91	28.0453	Yes	240	5.9385	5.772	4.8285	3.33	2.6085	3.885	4.7175	19.2	18.6	180	126				180	60		23			41	45			5.06752	4.773	5.8275	6.66	6.2715	9.24	54.3	108.96	165.72	4	534.465	0			1.96011	A A
307	White	No	52.3186	Male	180	90.9	28.0556	Yes	240	5.1615	5.106	4.995	3.7185	2.6085	3.663	4.2735	25.8	27.6	60	72	35.4	24	33	72	90							2.886	90	5.91852	5.661	8.214	10.1565	9.4905	63.24	125.76	299.7	425.64	4	768.398	89.0775			15.9112	A A
308	White	No	77.0611	Female	159	71	28.0843	Yes	240	6.438	6.105	5.439	4.3845	3.552	4.107	4.0515	132	324	384	294	108	90		384	60	10		13				2.664	120	37.7696	4.995	6.66	6.105	5.328	21.24	539.4	156.42	83.88	4	526.14	0	20		4.71528
309	White	No	63.82	Male	180	91	28.0864	Yes	240	6.66	6.8265	4.9395	4.0515	3.0525	4.1625	4.4955	61.32	336.36	128.28					336.36	30		7.8					3.4965	90	18.1507	4.8285	7.104	4.218	5.2725	13.44	85.92	82.32	66.3	4	506.993	0		13	2.88422	G A
310	White	No	49.9723	Male	183.3	94.4	28.0962	Yes	240	3.996	4.107	3.8295	2.7195	1.887	2.553	2.997	115.02	75	76.5	36.3	21.96	38.22	151.44	151.44	240		22	18	49			3.996	180	20.4276	4.4955	3.9405	4.218	5.8275	27.48	182.1	52.92	282.18	4	423.742	0		29	5.4905	G A
311	White	No	58.6897	Female	150.3	63.5	28.1097	Yes	120	5.55	5.4945	5.3835	4.884	3.885				27.72		28.56	31.02											2.4975	120		5.1615	9.213	6.993	6.993	19.5	286.2	212.82	206.52	4	668.498	49.1175			4.4733	A A
312	White	No	48.7949	Male	183.4	94.6	28.125	Yes	240	6.438	6.327	5.7165	4.662	3.9405	3.1635	4.107	39.12	1.14	124.56	63.48	42.96	52.5		124.56	60			23				2.886	90	11.1935	4.8285	6.66	6.771	5.661	22.56	111.84	275.52	85.26	4	543.623	0		11	4.84138
313	White	No	56.5981	Female	166.2	77.8	28.1655	Yes	120	4.9395	4.884	4.44	3.885	2.442			12.3	13.38	57.72	38.82	28.68	19.14	17.16	57.72	60			33				3.33	180	2.70026	4.773	6.7155	7.3815	6.0495	387.6	42.54	380.82	356.82	4	565.268	0		24	82.2229
314	White	No	24.3675	Male	190	101.7	28.1717	Yes	60	4.44	4.4955	3.6075					17.4	1.92	106.92	10.86	19.02	0.96	13.74	106.92	60							3.9405	180	3.4336									N/A						A A
315	White	No	53.5371	Male	185	96.5	28.1958	Yes	120	4.884	4.884	4.7175	4.44	3.4965			52.74	149.28								8.8						2.6085	90	11.4481	4.4955	6.6045	8.1585	6.771	18	144	186	120	4	591.075	51.615			3.5964	A A
316	White	No	59.8315	Female	161.29	73.5	28.2535	Yes	240	5.1615	5.217	4.4955	3.2745	3.552	3.6075	4.218	120	120	162	384	324	120	180	384	90		22	55	26					27.528	4.662	10.2675	10.989	6.327	25.86	266.82	796.56	178.2	4	732.6	173.16			5.35819	A A
317	White	No	62.03	Male	172.1	83.7	28.2595	Yes	90	4.995	4.6065	3.4965	2.2755				25.92	30.9	51.24	49.02	42.06	10.56	28.14	51.24	60		41	48	30	61	56	3.108	180	5.75424	5.217	7.659	10.323	9.9345	83.94	300.48	522.72	554.28	4	760.905	134.865		50	19.4629	G G
318	White	No	68.17	Female	168.2	80.0136	28.2821	Yes	240	6.549	6.3825	5.8275	5.106	4.662	4.218	4.218	82.8	48.78	51.72	54.96	85.74	89.1	72.54	89.1	180	23	35		31			3.441	60	24.1003	5.328	8.88	10.1565	5.6055	29.34	364.5	558.66	676.86	4	666.832	27.4725	21	25	6.94771	G A
319	Black	No	48.1735	Female	180.5	92.4	28.3607	Yes	240	5.4945	5.4945	3.663	2.997	3.774	3.996	4.4955	101.34	63.18	215.7	75.6	57.3	46.68	75.66	215.7	60	10	39	32				4.107	240	24.7472	4.9395	6.8265	6.3825	6.438	31.02	141.3	138.06	152.28	4	567.765	0	9.3	36	6.80992	A A
320	White	No	58.9773	Female	161.5	74.1	28.4101	Yes	60	5.217	4.44	2.331					12.24	21.24	29.28	22.8	36.06	15.3	10.38	36.06	120							3.33	60	2.83805									N/A
321	White	Yes	41.25	Male	178.3	90.5	28.4673	Yes	120	4.7175	5.0505	4.8285	4.3845	3.6075			21.66			19.2							14					3.3855	240	4.54138	4.8285	8.658	9.99	7.659	1.62	723.66	863.94	876.9	4	711.787	132.367		13	0.347652
322	Black	No	49.8463	Male	171.2	83.5	28.4891	Yes	240	5.106	4.884	2.9415	2.109	3.3855	3.996	4.7175	14.76	48.84	71.7					71.7	60	5.7	15	5				2.6085	120	3.34954	4.2735	7.548	9.6015	8.88	14.4	162	270	336	4	700.965	188.145	3.1	26	2.73504	A A
323	White	No	75.9413	Female	152.2	66.1	28.5346	Yes	120	4.773	4.662	3.996	3.2745	2.886			40.74	37.98	51.42	46.2	42.12	50.34	89.94	89.94	240	6.6	34	48	93	77	72	2.109	120	8.64231	4.3845	5.3835	6.6045	3.4965	32.04	92.34	233.34	17.1	4	431.235	0	8.7	42	6.24353
324	White	No	66.052	Male	174.7	87.1	28.5386	Yes	240	6.3825	6.4935	5.994	5.1615	3.885	3.1635	4.0515	6.54	66.9	69.84	64.38	51.42	54.66	69.48	69.84	60							2.553	90	1.85518	5.0505	7.548	7.7145	8.8245	32.52		382.86	418.2	4	682.65	76.59			7.29966
325	White	No	55.6862	Male	186.9	99.7	28.5415	Yes	240	5.7165	5.8275	5.772	5.3835	4.6065	3.219	3.7185	25.8	8.76	19.08	73.68	14.28	4.62	27.96	73.68	90	18	25	42	40	81	62	2.9415	90	6.55492	4.884	8.436	10.767	8.2695	90	414	783.6	768	4	735.93	149.85	20	33	19.536	G G
326	Black	No	42.9	Male	170.7	83.3	28.5876	Yes	240	5.883	5.6055	4.2735	2.9415	3.3855	3.8295	4.107	30.24	35.94	136.32	146.22				146.22	90	9.4	15	10				3.4965	240	7.90675	4.662	7.215	5.1615	3.663	10.5	141.06	108.06	34.44	4	473.692	0	6.1	17	2.1756	A A
327	Black	No	51.6343	Male	188.6	101.8	28.6197	Yes	240	5.8275	5.7165	5.772	4.662	3.1635	4.107	4.773	12	27.3	57.36	14.28				57.36	60		13	12	11	14	15			3.108	5.6055	7.992	9.879	5.883	1.2	71.58	106.98	21.9	4	648.518	0			0.29896	A A
328	White	No	41.2656	Female	170.5	83.2	28.6203	Yes	240	4.8285	4.662	4.1625	2.997	3.33	3.7185	3.996	18.6	138	174					174	60		14					2.553	60	3.99156	4.2735	5.55	5.0505	3.996	15.84	99.72	107.64	29.34	4	426.24	0		9	3.00854	A A
329	White	No	38.3718	Male	185	97.98	28.6282	Yes	120	4.3845	4.995	5.1615	4.6065	1.221			29.94	147.9	184.74	250.08	111.72	35.28	35.7	250.08	90		50	58				3.2745	90	5.83431	5.3835	9.324	10.8225	6.771	57.06	473.82			4	725.94	79.92		41	13.6526	G G
330	White	No	74.3041	Male	183	96	28.6661	Yes	240	7.6035	7.1595	6.66	5.55	4.9395	3.774	3.8295	30.6	138	144	37.2	23.4	22.2	16.8	144	60		26			32	27	1.776	90	10.3408	8.6025	9.546	9.879	10.434	347.16	175.8	254.34	190.08	4	876.622	0		27	132.731	A A
331	White	No	65.1485	Male	166	79.2	28.7415	Yes	240	5.439	5.2725	5.0505	4.551	3.663	3.33	3.33	61.2	42.36								8.8	23	28				2.442	90	14.7941	4.662	6.216	7.4925	6.549	17.4	63.24	120.36	109.2	4	565.268	5.8275	9.3	33	3.60528	A A
332	White	No	51.6587	Male	187.9	101.6	28.7766	Yes	90	4.8285	4.8285	3.2745	1.9425				17.82	7.5	83.7	61.44				83.7	60	21	18	17	14	11	5	2.553	60	3.82417	4.662	7.104	10.9335	11.2665	7.26	15	19.2	50.88	4	785.048	225.608	11	11	1.50427	A A
333	White	No	57.507	Male	178.1	91.3	28.7835	Yes	240	7.548	7.215	6.4935	5.994	5.217	3.885	3.552	31.86	20.88	51.48	129.9	53.82	36.12	34.26	129.9	90	21	33	45	63	66	63	3.219	180	10.688	5.217	7.548	9.213	6.66	64.26	372	696.54	335.94	0	642.69	16.65	17	49	14.8998	A A
334	Asian	No	29.9144	Male	175.26	88.63	28.8546	Yes	90	4.9395	4.2735	2.997	2.109				44.76	36.66	60	122.52	129.84	87.06	30.66	129.84	120							2.442	90	9.82631	5.217	9.213	13.653	8.214	74.28	183.18	262.74	382.5	1	805.86	179.82			17.2231	A A
335	Black	No	47.9956	Female	161.5	75.3	28.8702	Yes	240	4.995	5.0505	4.995	4.7175	4.107	3.2745	3.552	12.72	13.86	10.92	12.3	18.48	30.66		30.66	180	8.1	19	5	19	17	20	3.552	120	2.82384	4.329	7.548	9.324	8.1585	26.4	264	390	378	4	675.99	156.51			5.07936	G A
336	White	No	22.3522	Female	162	75.8	28.8828	Yes	240	5.106	4.884	4.551	3.6075	3.552	3.441	3.33	15	24	39.6	37.8	37.8	7.8	17.4	39.6	60		55	40	42	61	50	2.331	90	3.404	4.9395	7.326	7.77	5.8275	329.04	275.22	553.62	342.9	4	585.247	0		34	72.2352	G A
337	Black	No	53.4467	Female	172	85.7	28.9684	Yes	240	5.439	5.439	4.44	3.4965	4.2735	4.2735	4.773	19.5	86.76	48.84	29.64	11.76	18.42	1.32	86.76	30					20		3.1635	120	4.7138	4.44	8.1585	9.102	6.993			199.74	229.62	4	657.675	124.875				A A
338	Asian	No	29.65	Female	154.75	69.4	28.98	Yes	240	4.884	4.995	4.884	4.884	3.3855	3.4965	3.3855	19.32	23.64	121.2	65.88				121.2	60	7.4	24	14	27	10		5.2725	180	4.19373	5.0505	8.547	10.212	7.215	6.84	81.6	61.86	53.46	4	701.797	95.7375	6.4	17	1.53535	A A
339	Black	No	44.877	Female	172.5	86.5	29.0695	Yes	240	5.883	5.7165	5.217	4.3845	3.552	3.552	3.7185	78	45	246	138	66	66	58.8	246	60	12	41	40	39	78	65	3.7185	60	20.3944	5.217	5.994	5.8275	6.0495	36.48	206.76	113.46	149.22	4	526.972	0	12	32	8.4585	G A
340	Black	No	22.6233	Female	162.6	77	29.1239	Yes	120	4.662	4.662	4.3845	3.9405	3.7185			15.78		30.42	24.6		34.38										1.4985	60	3.26962	4.662	7.7145	9.0465	7.326	24.18	62.58	83.46	190.2	4	656.842	97.4025	5.4	20	5.0101	A A
341	Asian	No	26.4263	Female	153.5	68.7	29.1568	Yes	240	5.661	5.4945	5.2725	4.995	3.2745	3.4965	4.218	27	13.8	42.6	192	156	22.2	144	192	90							3.7185	120	6.7932	4.884	5.883	6.549	5.2725	25.44	193.68	373.68	67.68	4	506.16	0			5.52218	G G
342	White	No	61.6359	Male	176.2	90.6	29.1821	Yes	90	4.995	4.773	4.0515	2.7195				152.7	118.62	116.28	120.3	221.4	69.84		221.4	120	14	39	51				3.0525	90	33.8994	4.218	6.216	6.882	6.6045	25.38	258.54	195.84	181.02	4	551.115	44.955	8.5	23	4.7579	A A
343	White	No	55.67	Male	180	94.6	29.1975	Yes	240	6.1605	5.6055	5.9385	4.662	4.4955	4.3845	3.552	13.38	20.4	35.7	25.44				35.7	60		12	13				2.0535	90	3.66344	3.9405	6.438	6.549	5.994	3	58.62	138.54	55.92	4	530.303	57.4425			0.5254
344	White	No	74.1507	Male	174.6	89.1	29.2273	Yes	240	4.8285	3.8295	2.2755	2.997	3.0525	3.4965	4.44	25.2	11.88	102.84	55.98				102.84	60		18		44	32	25	2.664	120	5.40792	4.8285	6.771	7.2705	6.3825	5.88		115.38	81.78	4	576.09	0		33	1.26185	A A
345	White	No	78.1753	Male	175.1	89.8	29.289	Yes	90	5.106	4.8285	4.218	2.2755				28.68	40.86	54.24	78.24	293.52			293.52	120	3.9	38	29	51	50	51	2.775	90	6.50845	4.773	6.327	6.8265	6.549	17.22	146.04	206.28	166.44	4	560.273	0	4.6	28	3.65294
346	White	No	48.8552	Male	183.5	98.7	29.312	Yes	240	6.771	6.327	5.9385	4.8285	4.0515	2.9415	3.4965	33.06	38.16	82.86	43.62	26.76	28.32	27.3	82.86	60	60						2.664	90	9.94886	8.103	12.21	15.5955	15.1515	60	102	174	276	3	1176.32	203.963			21.608	G A
347	White	No	51.7191	Male	170	84.8	29.3426	Yes	240	4.884	4.884	4.995	4.884	4.662	4.662	3.4965	66	282	510	720				720	90		53	36	50	55	46	4.0515	180	14.3264	4.44	5.8275	6.549	6.105	12.12	87.72	107.34	95.46	4	522.81	0		17	2.39168	G A
348	White	No	63.8262	Male	165.5	80.4	29.3535	Yes	240	5.3835	4.995	4.1625	3.0525	3.9405	4.3845	4.9395	28.8	31.98	67.74					67.74	60		17	15				3.9405	120	6.89088	4.6065	5.55	6.0495	5.6055	13.32	56.76	47.52	93.66	4	494.505	0		18	2.72705	G G
349	White	No	25.4406	Female	163	78	29.3575	Yes	240	4.107	4.3845	4.218	4.218	3.108	3.33	2.9415	12.78	27.18	47.34	34.5	52.2	17.76	28.8	52.2	120		22	12	29	20	16	3.1635	60	2.33278	5.7165	8.9355	10.6005	9.435	74.58	511.2	721.62	777	4	795.87	109.89	37	23	18.9483	A A
350	White	No	57.1895	Female	160.2	75.4	29.3796	Yes	240	7.1595	6.6045	5.7165	4.7175	3.885	3.0525	3.2745	49.2	16.8	138	57.6				138	60		26	27	57	49	33	2.997	240	15.6554	3.885	5.0505	5.6055	5.0505	7.68	58.44	102	115.38	4	445.388	0		35	1.32608
351	Black	No	23.1683	Female	165	80	29.3848	Yes	90	4.4955	4.218	3.6075	2.553					231.3	150.78	109.26	107.82	104.7	55.74	231.3	30										4.1625	8.3805	6.105	5.106	48.48	434.7	567.24	517.68	2	558.608	59.1075			8.9688	A A
352	White	No	70.137	Female	152.4	68.3	29.407	Yes	240	5.2725	5.217	4.1625	2.775	2.886	3.33	3.885	117.12	136.68	209.34	157.5	160.44	115.44	66.96	209.34	60							3.9405	90	27.4451	4.4955	6.6045	7.326	6.771	37.26	393.6	222.48	244.38	3	578.587	39.1275			7.44455
353	White	No	51.8861	Male	173	88.1	29.4363	Yes	240	4.9395	4.773	4.7175	4.3845	3.552	3.108	3.885	16.62	32.04	103.8					103.8	60		5	5	19	21	26	1.7205	120	3.64864	4.329	7.1595	7.2705	7.1595	14.4	258	156	174	4	603.562	84.0825	4.2	5	2.77056
354	White	No	58.0546	Male	179.4	94.8	29.4553	Yes	240	6.2715	5.9385	5.772	4.8285	8.0475	3.6075	4.218	30.9	132.36	265.02					265.02	60	4.1	40	40				3.3855	180	8.61286	5.0505	6.8265	6.216	5.9385	13.86	46.26	61.5	45.6	4	551.947	0	4.6	41	3.11111	G A
355	White	No	24.819	Female	161.1	76.6	29.5147	Yes	240	4.551	4.551	4.107	3.441	2.7195	3.33	3.996	9.72	71.76	68.04	104.76	227.52	111.3	82.8	227.52	120	11	30					2.9415	120	1.96603	5.1615	7.1595	9.0465	7.1595	28.14	60.12	181.2	236.46	4	642.69	23.31	9.5	37	6.45532
356	White	No	49.7779	Male	176	91.5	29.539	Yes	90	5.55	5.3835	4.551	2.7195				73.08	76.74	188.04	132.18	69.66	45.18	55.5	188.04	60	5.6	14	12	17	14	25	3.4965	180	18.0264	4.662	6.438	6.327	5.217	43.8	258	342	138	4	514.485	0	6.1	35	9.07536	A A
357	Asian	No	73.0063	Female	159.3	75.1	29.5943	Yes	120	4.9395	4.995	4.1625	3.219	2.7195			116.7			214.86	94.38	102.84	94.2									2.775	60	25.6195	4.44	6.9375	6.6045	4.8285	31.38	346.56	576.54	73.86	4	518.648	0			6.19232	A A
358	Black	Yes	59.1881	Female	152	68.4	29.6053	Yes	90	5.328	5.106	4.218	2.8305				17.82	28.08	54.66	66.3	17.94	22.68	18.48	66.3	90							2.775	90	4.21978	17.205				69.18				3					52.8996	G A
359	White	No	25.5775	Female	158.5	74.4	29.6152	Yes	240	4.6065	4.662	4.3845	3.996	2.775	3.4965	3.885	45	60	162	52.8	35.4	50.4	43.8	162	60	11	20	19	68	43	27	3.774	60	9.213	4.8285	6.549	7.9365	7.6035	54	210	294	486	4	616.05	36.63	11	16	11.5884	G A
360	Asian	No	51.2837	Female	155.8	72	29.6618	Yes	90	5.439	5.55	4.662	2.331				20.64	22.86	75.78	19.62				75.78	60		32	40	46			2.8305	120	4.98938	4.2735	4.551	5.439	5.106	2.34	119.7	58.14	225.6	4	435.397	0		19	0.444444	G A
361	White	No	68.25	Female	161.3	77.2	29.6721	Yes	240	6.3825	6.0495	4.773	3.9405	4.6065	4.551	4.44	16.2	53.1	88.44	41.88	22.98	19.26	12.48	88.44	60	13	5	5	38	43	29	2.775	120	4.5954	4.551	9.9345	7.0485	5.8275		306	282	174	4	646.852	100.732	11	5		G A
362	White	Yes	22.44	Male	165.5	81.3	29.6821	No	0	4.4955							31.38	23.1	35.76	48.06	80.22	86.04	51.48	86.04	180	8.2	32	27	61	46	40	3.7185	180	6.26972	4.773	6.1605	7.9365	6.66	45.48	132.84	368.22	468.48	4	575.257	2.4975	7.9	64	9.64782	G G
363	White	No	31.2889	Female	170.4	86.3	29.7216	Yes	120	4.2735	3.996	4.0515	3.108	2.109			62.16	53.64	51.3	48.78	53.34			62.16	0							4.4955	120	11.8063	4.995	6.9375	7.0485	6.549	18.54	100.92	125.64	139.86	4	585.248	0			4.11588	A A
364	Black	No	60.9622	Female	166.1	82.1	29.758	Yes	60	4.773	4.662	2.553					4.98	33.6	52.26					52.26	60	6.6	22	23	27	35		3.552	180	1.05642	5.217	8.7135	5.106	6.105	11.4	325.26	66.9	99.84	4	599.4	0	4.4	12	2.64328	A A
365	White	No	70.5202	Male	168.9	84.9	29.7611	Yes	90	5.106	4.9395	2.997	1.776				24.06	28.74	70.8	25.26				70.8	60		21	17	19	23	26	3.0525	180	5.46002	3.9405	5.55	6.438	7.0485	2.7	84	123.6	37.56	4	533.632	60.7725			0.47286	G A
366	White	No	34.443	Female	165.5	81.6	29.7916	Yes	240	5.2725	4.9395	4.4955	3.1635	3.6075	3.996	4.551	49.8	96	330	102	72	60	60	330	60	19	5	5	5	18	11	2.8305	180	11.6698	5.883	8.0475	9.0465	9.7125	31.44	101.46	139.2	157.8	4	756.743	50.7825	20	14	8.22051
367	White	No	53.21	Male	173.5	89.7	29.7984	Yes	60	5.328	5.2725	2.3865					18.9	32.22	40.74	25.74	35.82	19.44	8.16	40.74	60							2.775	90	4.47552									N/A						G A
368	Black	No	45.88	Female	179.9	96.5	29.8171	Yes	240	4.551	4.662	4.329	3.774	3.2745	3.6075	3.774	10.8	61.92	55.5					61.92	30	6.1	37					3.774	180	2.18448	3.996	6.3825	6.7155	5.883	15.24	107.46	72.12	50.58	2	528.638	49.1175	4.1	35	2.70662
369	White	No	79.5911	Male	176.5	92.9	29.8213	Yes	240	5.6055	5.2725	4.8285	3.0525	2.997	3.33	3.885	156	276	306	270	114	156	96	306	60							3.9405	240	38.8648	5.106	7.4925	6.105	4.884	26.82	322.38	283.26	110.58	4	539.46	0			6.08635	G A
370	White	Yes	30.2565	Female	153.5	70.3	29.8359	Yes	120	4.9395	5.217	5.2725	4.6065	3.552				52.74	72	182.46		164.46	126.42			5.8		21				3.2745	60		7.4925	4.218	5.4945	6.3825	16.86	165.24	321.24	232.26	4	512.82	0	6	23	5.61438	G A
371	Asian	No	19.8471	Male	161	77.4	29.86	Yes	240	4.8285	4.662	3.6075	2.886	3.1635	3.6075	3.9405	39.9	37.68	247.44	131.76	42.84	44.16	40.68	247.44	60	11	25	13	66	46	25	2.3865	90	8.56254	4.329	5.2725	5.772	5.0505	66	456	720	552	4	461.205	0	12	25	12.6984	A A
372	unknown or not reported	Yes	18.4427	Female	157	73.7	29.8998	Yes	240	5.3835	5.217	4.9395	3.6075	2.9415	3.6075	4.2735	30.48	329.82	355.38					355.38	60	14	36	23				3.885	120	7.29285	4.9395	7.0485	5.0505	6.216	14.46	172.68	95.22	81.78	4	547.785	0	16	48	3.17445
373	White	Yes	45.589	Female	155.6	72.5	29.9446	Yes	240	4.218	3.9405	2.9415	2.109	2.664	3.552	3.8295	11.94	15.42	29.52	40.26							31	57	67	68	52	3.774	180	2.23835	4.3845	6.3825	9.3795	6.9375	5.46	46.68	159.66	75.66	4	606.06	79.92		20	1.06397	A A
374	Asian	No	45.07	Male	168.28	84.8	29.9455	Yes	240	5.1615	5.1615	3.9405	2.6085	3.2745	3.33	4.3845	11.46	14.28	50.22					50.22	60		11					2.3865	120	2.62892	4.662	7.104	7.9365	6.993	12.72	20.7	159	81.78	4	611.888	52.4475		12	2.63558
375	White	No	60.5131	Male	170.1	86.8	29.9993	Yes	240	5.994	6.0495	5.8275	5.6055	5.1615	3.7185	3.552	43.14	151.38	50.58	17.58	36.54	67.62	70.38	151.38	30		22	18				2.3865	90	11.4925	4.2735	7.1595	5.439	4.884	38.4	601.2	571.14	333.6	4	506.993	0		12	7.29344	A A
376	unknown or not reported	Yes	64.4997	Female	153.2	70.6	30.0806	Yes	90	4.551	4.7175	3.4965	2.0535				34.38	43.8		36.48	31.08	32.52	27.48			160	42	39	37	68	51	2.997	90	6.95393	6.4935	9.2685	8.6025	9.657	74.16	306.54	226.74	244.68	4	794.205	14.985	130	41	21.4026	0 0
377	White	No	59.407	Female	165.1	82.1	30.1196	Yes	240	4.44	4.7175	4.2735	3.0525	2.22	2.9415	3.885	58.44	81.78	268.8	165.12				268.8	60	6.3	29	35	71	60	39	3.108	60	11.5322	4.7175	6.3825	8.0475	7.8255	10.38	89.58	76.5	115.26	4	617.715	51.615	6.8	20	2.17634	A A
378	Black	No	45.8297	Female	160.9	78	30.1288	Yes	60	5.1615	4.4955	2.2755					37.86	99.12	158.34	100.8	41.94	29.4	31.56	158.34	60	17	55	55	131	87	63	3.552	180	8.68508	4.773	7.326	6.7155	5.661	78.9	430.86	558.66	161.04	4	561.938	0	17	78	16.7373
379	White	No	58.4981	Male	175	92.3	30.1388	Yes	90	5.1615	4.773	3.2745	2.442				37.2	49.26	39	61.14	114.48	57.06	34.8	114.48	120	34	47	40	44	28	72	2.775	120	8.53368	5.106	6.882	8.6025	8.88	62.4	120.06	118.56	124.32	4	678.487	65.7675	29	58	14.1606	A A
380	Black	No	26.7028	Male	177.3	94.8	30.1572	Yes	240	4.2735	4.1625	4.0515	3.441	2.9415	3.6075	3.7185	25.2	154.2	55.2	305.82	113.28	188.76	114.6	305.82	90	10	40	47				1.665	90	4.78632	4.9395	7.77	7.437	4.3845	26.16	285.36	192.96	49.8	4	550.283	0	9.1	51	5.74299	A A
381	White	No	70.7118	Female	174	91.4	30.1889	Yes	90	5.3835	4.995	3.552	2.886				18.66	102.66	62.7					102.66	30	6.1	13	19	33	5	20	2.22	90	4.46472	4.44	9.6015	3.663	5.439	13.8	678	39.6	72	4	572.76	39.96	5.2	14	2.7232	A A
382	White	No	62.33	Male	171.5	88.8	30.1915	Yes	240	5.7165	5.4945	5.217	3.0525	4.1625	3.885	4.662	40.8	108	144	10.8	44.4	34.8	27.6	144	60		43	46	87	78	55			10.3659	4.995	7.881	6.9375	7.548	94.32	241.98	252.72	292.32	4	641.858	42.4575		79	20.939	A A
383	White	No	79.0735	Female	163.5	80.8	30.2257	Yes	240	5.6055	5.4945	4.6065	3.4965	2.775	3.663	4.0515	66.66	53.94	141.12	21.48	17.28	25.38	16.8	141.12	60	27	32	36	40	41	38	4.218	240	16.6072	5.9385	6.8265	7.215	4.884	407.82	690.12	879.54	165.3	4	548.618	0	18	69	107.637	G A
384	White	No	72.1356	Male	175.3	93	30.2635	Yes	240	6.0495	5.994	5.439	4.884	4.662	4.4955	3.9405	28.8	81.66	278.7					278.7	60	7.7	18	19	19	42	27	3.2745	120	7.74336	4.773	4.7175	6.66	7.881	14.7		95.04		4	549.45	0	5.9	18	3.11836	A A
385	White	No	62.408	Male	170.8	88.3	30.2681	Yes	240	6.1605	6.105	5.661	4.7175	3.885	3.108	3.4965	114.66	114.66	113.94	389.52	456.9	457.08	131.76	457.08	180	7.8	16	20	20	24	27	2.775	60	31.3939	5.3835	8.88	10.4895	8.325	23.4	228	372	450	4	754.245	108.225	6.9	12	5.59884	G A
386	Black	No	21.9306	Female	176.5	94.5	30.3349	Yes	240	4.44	4.551	3.0525	3.4965	3.33	4.0515	4.2735	18.6	102	66	51	25.2	25.2	3.6	102	30	11	17	30	20	34	38	2.0535	120	3.6704	4.884	7.8255	11.1	4.44		75.84	262.5		4	607.725	21.645	8.8	15
387	White	No	51.1222	Male	171	88.8	30.3683	Yes	240	5.439	5.106	5.0505	4.8285	5.0505	5.0505	4.6065	22.5	14.58	22.44	22.2	17.88	15.84	13.14	22.5	0	24	34	25	28	33	34	2.664	120	5.439	4.773	5.994	6.216	4.884					4	491.175	0	14	44
388	Black	No	57.8821	Female	170.6	88.4	30.3735	Yes	240	6.66	6.0495	5.106	4.218	3.552	3.885	4.329	1.86	21.36	63.96	77.34	38.4			77.34	90	21.2						2.553	120	0.55056	6.9375	13.8195	14.763	9.102	14.4	13.8	20.4	150	4	1013.15	180.652			4.44	A A
389	Black	Yes	21.008	Female	159.4	77.2	30.3837	Yes	240	4.218	3.9405	2.4975	2.775		3.1635	3.4965	22.5	27	89.16	100.2				100.2	90	6.4	11	5	18	34	5	2.6085	90	4.218	5.0505	9.546	4.107	4.4955	7.8	776.34	191.7	39.48	4	558.607	0	4.7	15	1.75084
390	Asian	No	43.9708	Male	174.4	92.5	30.4123	Yes	120	4.9395	4.8285	4.4955	3.8295	2.4975			10.62	10.8	37.62	39.42	34.14	13.32	20.76	39.42	90	47	22	23	23	31	29	2.7195	120	2.33144	6.771	12.4875	15.54	14.9295	114		528		0	1157.17	344.655	47.2	17	34.3064	A A
391	Asian	No	27.8582	Female	175.6	93.8	30.4196	Yes	240	4.8285	4.8285	4.3845	3.9405	3.4965	3.219	3.219	37.44	93.42	132.66	78.9	79.2	58.86	43.02	132.66	60	6.7						3.33	240	8.03462	5.0505	9.324	9.546	9.657	52.8	372	642	576	4	788.377	182.317	5.6	13	11.8518	A A
392	Black	No	65.8056	Female	152.4	70.7	30.4403	Yes	240	4.662	4.8285	3.774	2.7195	3.4965	3.6075	3.996	78	52.2	66	144	246			246	120	7.1				12		2.775	120	16.1616	4.551	8.2695	10.434	10.767	18.18	24.12	72.6	49.68	4	795.87	249.75	6.4	5	3.67721	G A
393	White	No	50.2049	Female	152.6	70.9	30.4465	Yes	240	4.218	4.0515	3.1635	2.331	2.7195	3.3855	3.774	53.34	33.24	68.28	94.02	86.58			94.02	90	5.9	11	5		5	23	2.331	60	9.99947	4.995			8.3805	17.94		26.19	431.7	4			4.9	5	3.98268
394	White	No	23.6692	Male	170	88	30.4498	Yes	240	4.995	4.9395	4.9395	4.7175	3.885	3.885	4.44	132	180	852	144				852	60	18	46	38	43	66	55	2.442	120	29.304	4.662	6.327	5.772	6.993	10.38	448.5	111.6	272.04	4	556.11	0	15	27	2.15074	A A
395	Black	No	33.9693	Female	161	79.1	30.5158	No	0	4.107							16.68	19.14	27.24	22.86	19.14	25.38	20.1	27.24	60	44	23	21	11	14	23	2.9415	240	3.04466	5.439	7.2705	6.7155	6.327	156	294	282	300	4	590.243	0	36	42	37.7104
396	White	No	71.9741	Male	181.8	101.2	30.6191	Yes	90	4.6065	4.3845	3.108	2.109				15.36	20.1	54.78	78.72	32.28	20.46	15.24	78.72	90		28	15	32	23		3.219	120	3.1447	4.9395	6.438	8.1585	7.881					4	626.04	33.3		17		A A
397	White	No	65.132	Male	169.1	87.7	30.6699	Yes	240	8.9355	8.436	6.993	6.0495	5.0505	3.8295	4.329	6.96	10.74	11.52	14.4	45.12			45.12	120		17	16	27	23	22	3.1635	180	2.76405	4.884	9.1575	10.545	6.216	19.74	194.46	301.62	172.74	4	692.64	106.56		18	4.2849	A A
398	Black	No	53.2743	Female	168	86.6	30.6831	Yes	240	4.551	4.44	3.663	2.4975	2.886	3.4965	3.6075	258	426	870	918	1626	678	282	1626	120	9.9	5	5				3.108	90	52.1848	5.6055	9.102	10.656	7.0485	21	153.48	362.76	122.52	4	728.438	55.7775	7.1	12	5.2318	A A
399	Black	No	53.3618	Female	159	77.6	30.695	Yes	240	4.9395	4.773	4.551	4.329	4.218	3.663	2.886	35.4	120	210	102	50.4	66	49.8	210	60	28	56	50	48	71	87	3.108	90	7.77148	5.0505	6.216	8.4915	8.658	43.62	67.08	151.08	106.5	4	649.35	43.29	17	37	9.79124	G A
400	White	No	71.8564	Male	185.9	106.1	30.7013	Yes	240	6.3825	6.2715	5.772	4.995	4.329	3.8295	4.329	28.38	19.44	32.52	217.38	52.2			217.38	90	5.1	25	31	49	54	39	3.3855	240	8.05046	4.7175	7.1595	7.104	7.215	19.8	240	198	354	4	608.558	42.4575	3.5	27	4.1514
401	Black	No	28.7316	Female	171	89.9	30.7445	Yes	240	4.44	4.3845	3.8295	3.7185	3.2745	3.663	3.663	48	39.6	126	90	49.2	38.4	33.6	126	60		17					2.3865	120	9.472	4.773	7.0485	7.0485	5.883	72.12	542.76	561.72	249.36	4	565.267	0		16	15.2991	G A
402	Black	No	28.8274	Male	183	103	30.7564	Yes	60	5.1615	4.7175	2.886																				2.22	90										0
403	White	No	43.7792	Male	172.1	91.2	30.7917	Yes	240	4.9395	4.995	4.44	2.9415	3.552	3.441	3.8295	37.98	127.02	112.62	79.32	118.38			127.02	30		19	17	18	19	44	3.33	240	8.33788	4.773	7.7145	7.992	7.4925	18.18	314.82	182.52	381.18	4	647.685	74.925		19	3.85658	G A
404	White	No	22.9245	Female	170.5	89.7	30.8563	Yes	240	4.44	4.44	4.1625	2.775	3.4965	3.9405	3.885	13.68	9.36	52.32	43.14	35.22	29.52	24.72	52.32	60	74	48	42	47	64		1.443	90	2.69952	5.0505	5.7165	7.0485	7.7145	109.5	50.58	596.28	556.68	4	584.415	0	55	47	24.5791	A A
405	unknown or not reported	Yes	40.5155	Male	171.3	90.6	30.8755	Yes	240	11.211	9.9345	8.103	7.4925	6.66	6.327	6.549	14.16	37.2	258.3	159.6	40.44	100.26	41.04	258.3	60		27	43				2.9415	90	7.05546	4.3845	5.8275	6.7155	6.2715	63.96	120.48	1049.76	474.72	4	529.47	3.33		28	12.4637
406	Black	No	30.0978	Female	154	73.3	30.9074	Yes	240	5.2725	4.9395	2.775	3.0525	3.33	3.552	3.996	102	132	342	162	84	72	102	342	60	7.4	22	18	28	28	34	2.9415	240	23.902	4.773	7.104	5.328	4.1625	28.5	270.42	357.24	25.08	4	489.51	0	5.4	17	6.0458	A A
407	White	No	57.5671	Female	178.2	98.2	30.924	Yes	240	6.438	6.3825	5.661	4.662	3.552	4.218	4.2735	41.52	91.68	68.94	167.04	62.82	53.88		167.04	90	25	26	30	48	37	30	3.552	120	11.8803	4.44	7.215	7.881	6.2715	24.18	272.16	207.84	216.12	4	589.41	56.61	16	32	4.77152	A A
408	White	No	76.9516	Male	179.9	100.1	30.9294	Yes	240	4.995	4.7175	4.107	2.9415	3.3855	3.9405	4.1625	18.54	92.28	150.18	28.02				150.18	60		100	81	94			3.6075	180	4.11588	3.6075	5.106	5.7165	6.0495	5.7	127.26	156.12	258.6	4	474.525	41.625		65	0.9139	A A
409	White	No	74.8954	Female	153.8	73.3	30.9878	Yes	120	5.1615	5.439	4.995	2.8305	1.7205			6.54	7.5	12.24	3.66	6.18	14.64	14.34	14.64	180		34	36	103	68	29	2.7195	120	1.50028	4.995	6.882	7.4925	5.8275		268.5	298.08	147.48	4	568.597	0		20
410	White	No	24.97	Female	160.8	80.2	31.0172	Yes	240	4.8285	5.0505	3.9405	3.2745	3.8295	3.9405	4.2735	54	92.46	537.48	189.96	74.88	73.38	76.74	537.48	60							3.441	90	11.5884	4.8285	7.215	7.104	5.2725	31.62	442.8	502.02	314.22	0	553.612	0			6.78565	G A
411	Black	No	26.5	Female	171.2	91.1	31.0821	Yes	90	5.0505	4.884	4.662	3.1635				96.9	96.12	150.36	391.86	475.38	103.92		475.38	120	7	63					2.7195	90	21.7508	4.4955	6.66	5.2725	5.8275	23.22	292.86	244.86	235.08	4	521.145	0	8.4	56	4.63936	A A
412	White	No	38.3169	Female	154.7	74.4	31.088	Yes	120	5.106	4.9395	4.551	4.6065	3.552			25.86				25.02						30	21				2.886	90	5.8685	4.2735	6.66	6.0495	5.7165	23.58	187.38	323.88	19.68	4	526.14	13.32		41	4.47863	A A
413	White	No	55.4535	Female	146.4	66.7	31.1203	Yes	240	4.6065	4.551	3.9405	3.219	2.775	3.1635	3.108	7.56	6.3	45.9	61.86	27.06	24.54	10.74	61.86	90	15	50	37	93	75	53	2.886	60	1.54778	5.0505	8.0475	6.993	7.326					4	641.858	35.7975	17	5		A A
414	White	No	29.7775	Female	159.2	79.1	31.2098	Yes	240	4.3845	4.329	2.7195	3.0525	3.0525	3.2745	3.4965	111.72	72.9	82.08	167.7	109.08			167.7	90							2.886	120	21.7705	4.6065	6.882	6.1605	6.327	18.9	217.2	261.54	221.04	4	557.775	4.995			3.86946	A A
415	White	No	50.9031	Male	174	94.6	31.2459	Yes	240	5.1615	4.8285	4.8285	4.662	4.7175	4.551	3.441	41.4	43.2	51.6	120														9.49716	4.773				9.12			18.54	0					1.93466	G A
416	Black	Yes	25.2819	Male	178.7	100	31.3149	Yes	240	5.0505	4.773	3.885	3.108	3.663	3.885	3.9405	26.46	22.92	33.48	30.66	24.66	73.86	46.02	73.86	180	10	5	5	5	11	5	2.8305	90	5.93939	4.773	6.438	8.1585	8.2695	49.8	180	228	222	4	635.197	62.4375	7.2	10	10.5642	A A
417	White	No	55.3933	Female	168.1	88.5	31.319	Yes	240	4.995	5.0505	4.8285	4.107	2.886	3.0525	3.441	48.36	41.4	77.64	87.18	101.52	73.5	44.46	101.52	120	46	61	69	81			3.4965	120	10.7359	4.551	7.881	9.4905	8.214	54.42	332.52	429.54	256.86	4	693.473	147.353	33	70	11.0074	A A
418	White	No	26.722	Female	152	72.4	31.3366	Yes	240	4.8285	4.8285	4.44	3.0525	3.0525	3.552	3.885	51.6	51	102	78	60	38.4	38.4	102	60	16	38					2.886	240	11.0734	5.1615	9.3795	12.0435	9.435	58.2	264	642	924	0	822.51	203.13	15	42	13.3511	A A
419	Black	No	32.1348	Female	169	89.7	31.4065	Yes	240	4.551	4.6065	4.3845	4.218	3.8295	3.663	3.774	25.44	39.78	37.14	90.6	108.96	64.74	31.26	108.96	120	16	27	43	31	54	34	2.9415	120	5.14566	6.216	11.211	12.432	12.987	61.2	100.92	199.02	116.64	4	1005.66	259.74	20	34	16.9075	A A
420	White	No	35.4943	Female	159.8	80.2	31.4066	Yes	240	4.995	4.773	4.44	3.7185	2.775	3.774	3.2745	18.54	36.54	33.78	37.2	32.88	37.56	44.46	44.46	240	13	15	5				2.8305	180	4.11588	4.4955	6.7155	5.0505	5.55	55.2	876	558	498	4	511.155	0	12	11	11.029	G G
421	White	No	62.0848	Male	173	94.3	31.5079	Yes	240	4.9395	5.0505	4.8285	4.3845	4.107	3.33	3.33	115.2	161.52	407.88	316.5	176.4	109.02	112.08	407.88	60	22	37	28	77	63	43	2.6085	90	25.2902	5.661	7.8255	10.212	6.6045	23.04	161.4	229.26	233.16	4	670.995	0	33	39	5.79686	G G
422	White	No	55.3167	Female	166.2	87.0909	31.529	Yes	240	5.217	5.1615	4.44	3.4965	2.664	3.441	3.9405	15.72	11.46	47.58	31.92	32.88	22.26	21.66	47.58	60	14	43					2.8305	120	3.64494	5.0505	6.66	6.3825	6.66	136.92	53.34	494.76	705.54	4	571.095	0	19	33	30.734	G A
423	White	No	73.2992	Male	179.9	102.1	31.5474	Yes	240	6.3825	6.0495	5.439	4.8285	4.3845	4.218	4.0515	8.22	40.98	71.28	166.38	88.5	38.4	38.46	166.38	90		43	26	105	119	67	1.4985	120	2.33174	5.1615	7.8255	8.325	8.436	57.78	546.96	427.56	832.44	4	690.142	70.7625		46	13.2547
424	White	Yes	39.8667	Female	157	77.8	31.5631	Yes	60	4.218	3.9405	1.6095					9.72				9.96		14.58			11						11.433	240	1.82218									N/A						A A
425	White	No	62.7309	Male	169.3	90.5	31.5744	Yes	180	4.551	4.4955	4.3845	4.107	3.108	2.6085		10.98		24.54	26.4	17.1	22.74	13.56									2.886	120	2.22089	5.3835	7.215	7.8255	6.216			216.72	167.4	2	601.065	0				A A
426	White	No	41.66	Female	159.6	80.5	31.6031	Yes	240	5.217	5.1615	3.441	2.886	3.552	3.7185	4.6065	30.36	33.9	43.62	46.32	57	25.08	37.02	57	120	32	62	83	197	130	77	2.886	60	7.03947	4.995		8.3805	9.1575	60.42	395.4	591.96	963.66	4			33		13.4132	A A
427	Black	No	57.5069	Female	167.4	88.6	31.6172	Yes	240	5.2725	5.106	4.9395	4.551	4.1625	3.9405	2.553	79.98	98.34	247.8	250.74	53.64	73.38	77.82	250.74	90	12	24	25	26	30	32	3.0525	60	18.742	4.773	8.8245	13.986	11.9325	31.74	76.62	27.9	41.28	4	904.095	331.335			6.73311
428	White	No	53.39	Female	171.6	93.2	31.6506	Yes	120	5.1615	4.995	4.551	3.7185	2.1645			31.56	27.9	34.32	34.98	27.96	19.02	20.34	34.98	90	18	15	18	25	41	25	3.6075	120	7.23986	6.1605	8.325	7.8255	9.324	137.7	570.18	560.58	936.06	4	739.26	0	30	33	37.7023	A A
429	White	No	58.3009	Female	161.5	82.7	31.7074	Yes	240	5.4945	5.4945	5.439	5.1615	5.0505	3.2745	3.4965	53.4	420	228	114	46.2	39.6	58.2	420	30	18	31	33	43	58	39	3.0525	120	13.0403	5.1615	7.104	9.1575	5.328	37.8	162	330	180	4	587.745	0	12	28	8.67132	G A
430	White	No	61.4249	Male	165.5	86.9	31.7266	Yes	240	5.217	5.217	4.9395	4.107	3.33	3.33	3.774	33.84	66.12	173.1	80.52	48.54	34.26	32.88	173.1	60	53	48	51	40	38	51	2.7195	90	7.84637	7.437	11.433	13.5975	10.1565	50.04	240.24	343.38	354.12	4	963.202	70.7625	39	36	16.5399	G A
431	White	No	64.809	Male	185.6	109.4	31.7586	Yes	240	5.7165	5.328	4.6065	3.6075	3.219	3.6075	3.774	13.02									5.2	12	11	19	17	13	3.2745	120	3.30795	4.4955	6.882	6.216	5.8275	17.4	312	462	252	4	541.957	2.4975	4.4	5	3.47652
432	White	No	58.0985	Female	173.1	95.2	31.7719	Yes	240	5.6055	5.3835	4.44	2.331	2.442	3.0525	3.996	54.06	49.62	37.44	51.66	90.18	219.24	93.42	219.24	180							2.886	180	13.4681	4.7175	7.77	7.2705	6.2715	29.58	480.42	193.32	292.8	2	601.065	34.965			6.20194	A A
433	White	No	63.952	Male	177.4	100.2	31.8391	Yes	240	5.7165	5.6055	5.328	4.329	2.9415	3.6075	4.3845	47.22	60.3	311.82	80.46	59.28	50.22	47.52	311.82	60		39					3.6075	60	11.997	4.551	7.104	6.1605	6.327	50.7	804.78	405	296.28	4	563.602	17.4825		41	10.2549	A A
434	White	Yes	24.811	Female	175.5	98.1	31.8504	Yes	240	4.9395	5.1615	4.884	4.773	4.44	4.551	3.996	11.34	5.76	204.84					204.84	60	17		11	10	21	19	3.441	120	2.48951	4.995	6.3825	6.438	4.3845	13.68	286.02	217.14	162	4	494.505	0	14	5	3.03696
435	White	Yes	25.668	Female	169.4	91.4	31.8507	Yes	180	5.439	5.328	5.106	4.9395	4.107	3.1635		26.34	54.72	144.66	53.76	48.42	53.58	35.94	144.66	60							3.3855	60	6.36726	5.4945	8.6025	10.212	8.214	55.44	197.88	272.04	366.72	4	740.092	80.7525			13.5384	A A
436	White	No	58.0409	Female	154.5	76.2	31.9226	Yes	240	5.994	6.0495	4.7175	4.0515	3.2745	3.9405	4.4955	138	156	234	414	210	120	96	414	90		14					3.1635	120	36.7632	4.662	7.2705	6.8265	4.884	29.82	214.02	189.18	180.78	4	536.962	0		13	6.1787	G A
437	White	No	51.2317	Female	174	96.7	31.9395	Yes	240	4.8285	4.9395	4.8285	3.441	3.1635	3.7185	4.1625	17.4		3.6	40.2	15	66	18.6									2.8305	120	3.73404	11.766	17.316	22.5885	25.863	94.5	133.44	43.98	136.5	0	1810.69	398.767			49.4172	G A
438	White	No	58.1312	Male	175.6	98.5	31.9438	Yes	240	4.884	4.884	4.4955	4.3845	3.33	3.441	3.663	56.76	125.76	226.98	189.54	77.52	67.98	69.36	226.98	60	9.2	11	15				2.7195	90	12.3207	4.44	4.9395	8.1585	8.436	37.2	786			4	590.242	57.4425	16	22	7.3408	A A
439	White	No	49.6847	Male	173.7	96.8	32.0831	Yes	240	4.9395	4.773	4.329	3.885	3.3855	3.774	3.552	10.02										6.4					1.887	60	2.19972	4.329	6.4935	4.4955	3.8295	18.42	50.4	47.52	52.86	4	442.058	0		6.1	3.54401	A A
440	Black	No	35.8146	Male	181	105.2	32.1114	Yes	240	6.105	5.9385	5.106	4.44	3.774	4.4955	5.106	52.2	258	420					420	60	5.2	24	28	32	51	62	2.997	90	14.1636	5.0505	5.9385	7.659	5.883	14.34	130.56	212.88	119.1	4	545.288	0	5.6	11	3.21885	G A
441	White	No	60.7296	Female	158.1	80.3	32.1256	Yes	240	4.773	4.884	4.884	3.8295	2.775	3.3855	4.0515	25.08	16.92	32.7	69.84	19.86	11.52	22.74	69.84	90	34	32	39	39	38	40	3.552	180	5.3203	7.104	10.989	15.2625	15.2625	84	174	306	606	0	1123.04	270.562	28	30	26.5216	A A
442	White	No	52.6473	Female	185.4	110.5	32.1472	Yes	240	6.771	6.4935	5.2725	4.3845	3.441	4.107	5.217	8.88	11.76		32.34	8.46	9.3					57	42	44	105		3.1635	180	2.67229	4.329	7.9365	8.7135	8.6025	27.06	814.38	653.7	751.2	4	691.808	172.327		61	5.20634	A A
443	White	No	61.66	Male	185	110.2	32.1987	Yes	240	5.883	5.439	4.773	4.995	2.6085	2.8305	3.552	31.74	39.3	137.04	128.64				137.04	60	2.9	15	22	74	53	41	2.553	60	8.29895	4.7175	8.436	4.7175	5.4945	9.6	166.92	64.98	66.96	4	559.44	0	2.7	21	2.0128	G G
444	White	No	52.8114	Male	173.9	97.7	32.3069	Yes	240	5.661	5.772	5.3835	4.884	4.1625	3.4965	3.9405	44.04	35.28	405.6	48.84				405.6	60	5.2	17	21	26	48	47	3.7185	120	11.0805	4.0515	4.773	4.773	4.8285	6.6	34.2	20.4	22.8	4	420.413	0	4	20	1.18844	G A
445	White	No	54.3256	Male	172.6	96.5	32.3926	Yes	240	7.215	6.993	6.1605	5.4945	4.662	4.329	4.773	20.76	14.82	21.18	82.56	127.92			127.92	120	9.1	49		47	82	66	3.1635	180	6.65704	4.7175	6.2715	6.438	5.4945	18.12	69.3	136.5	114.06	4	520.312	0	14	43	3.79916	A A
446	White	No	27.5269	Female	166.5	89.9	32.4288	Yes	240	5.106	4.884	3.885	2.886	3.33	3.9405	4.4955	22.8	49.8	84	96	138	60	38.4	138	120	11	28	19	31	52	40	2.7195	120	5.17408	4.551	8.436	8.769	8.103	66	294	504	432	4	695.97	149.85	11	32	13.3496	A A
447	White	No	69.4088	Male	173.6	97.8	32.4518	Yes	60	4.9395	4.7175	2.9415					8.88	14.88	4.92	20.88	21.48	32.94	12.78	32.94	180	59	55	60	68	61	117	1.998	90	1.94946									N/A						G A
448	White	No	52.9292	Male	178	103	32.5085	Yes	240	5.328	5.3835	4.8285	3.3855	2.7195	3.885	4.44	34.8	66	288					288	60	11	14	12	12	16	20	2.664	60	8.24064	5.106	8.8245	11.4885	10.323	13.8	87.6	229.68	188.88	4	823.342	210.622	7.8	11	3.13168
449	White	No	62.7583	Female	167.7	91.6	32.5709	Yes	90	5.4945	5.3835	4.107	2.22				20.04	35.28	80.88	69.78	62.82	16.5	18.78	80.88	60	190	23	28	28	22	32			4.89377	5.8275	9.7125	10.878	10.1565	174	648	774	1140	4	846.652	147.352			45.066	G A
450	White	No	64.5024	Female	165	88.7	32.5803	Yes	240	4.551	4.662	4.551	4.329	4.1625	3.6075	2.8305	27	14.88	142.74	8.82						8.4	12		21			2.7195	60	5.4612	3.9405	4.662	5.0505	3.774	1.14	70.8	60.66	58.98	4	387.945	0	7.4	21	0.199652	A A
451	White	No	54.16	Female	164.3	88	32.5992	Yes	240	4.6065	4.773	4.329	3.996	3.441	3.885	3.9405	126	144	168	192	162	174	150	192	90	7.1	5	5	15	5	5	2.2755	60	25.7964	4.218	7.0485	7.3815	6.771	29.4	144	318	258	4	588.577	82.4175	7.5	5	5.51152	G A
452	White	No	46.22	Female	159.4	83	32.6664	Yes	60	3.4965	3.8295	1.443					19.98	21.66	25.92	23.4	21.3	14.94	13.86	25.92	60							2.331	120	3.10489									N/A						G A
453	White	No	18.9573	Male	175.2	100.4	32.7089	Yes	240	5.1615	5.2725	4.9395	4.329	3.108	3.7185	4.2735	23.04	34.08	66.48	183.36	82.8	47.4	46.44	183.36	90		23	17				3.1635	180	5.28538	4.884	5.883	7.548	7.437	48	162.54	227.34	236.58	4	586.08	0		18	10.4192	A A
454	White	No	58.3858	Female	155.5	79.1	32.7126	Yes	240	5.106	5.4945	5.217	4.773	4.2735	2.997	3.33	16.44	4.98	6.84	7.62		21.54	35.34			19	32	33	43	51	64	2.7195	90	3.73078	6.8265	9.8235	12.8205	10.434	45.78	154.38	271.62	204	0	902.43	83.25		22	13.8897
455	Black	No	57.1074	Female	152.5	76.2	32.7654	Yes	90	5.217	4.8285	4.3845	3.2745				41.64	42.54	81.36	212.16	184.98	43.74	57.78	212.16	90		75	38	66	71	70	2.997	180	9.65493	5.8275	10.2675	13.32	10.9335	33.54	95.82	265.32	284.64	4	923.242	223.942		36	8.68686	G A
456	White	No	61.9835	Female	170	95	32.872	Yes	240	5.2725	4.995	4.6065	3.6075	2.6085	3.4965	3.996	5.16	19.68	34.32	25.92	22.86	16.56	51.48	51.48	240		34	28	35	45	40	2.9415	120	1.20916	5.1615	8.0475	7.881	7.1595	42.24	269.7	143.58	202.44	4	651.848	32.4675		25	9.68986	A A
457	White	No	53.1673	Female	159.4	83.6	32.9026	Yes	240	4.44	4.329	2.664	2.3865	2.997	3.108	3.3855	85.32	71.34	62.16	202.2	165	83.52	53.28	202.2	90	52	59	47	50	66	67	3.108	180	16.8365	6.1605	9.8235	11.5995	10.878	34.56	439.44	104.52	45.66	4	887.445	148.185	42	49	9.46253	A A
458	Black	No	31.63	Female	171.9	97.8	33.0969	Yes	60	4.551	3.9405	1.7205					11.4	4.08	26.76	19.92	5.22	8.28	15.78	26.76	60	6.1	5	5	15		11	4.107	240	2.30584									N/A						A A
459	White	No	59.9985	Female	166.1	91.4	33.1289	Yes	240	5.328	5.0505	4.884	4.329	4.2735	3.774	3.0525	15.84	16.38								8.1	5	13				3.108	120	3.75091	6.6045	8.6025	8.2695	4.4955	12.42	173.1	445.92	69.84	4	616.05	0	14	17	3.64568	A A
460	White	No	45.4329	Male	176.4	103.1	33.1331	Yes	240	4.7175	4.662	3.6075	2.6085	3.3855	3.9405	4.3845	35.34	38.82	158.22	56.64	37.98	36.36	31.8	158.22	60		36	27		38	31	2.997	90	7.40962	5.439	8.8245	11.544	9.435	68.82	255	455.52	499.68	4	802.53	149.85		24	16.6361	G A
461	White	No	65.2936	Female	165.8	91.2	33.1761	Yes	240	6.66	6.549	5.3835	4.44	3.7185	3.774	4.1625	168	264	396	240	234	108	72	396	60		31	37	59	47	37	2.886	90	49.728	4.8285	5.55	6.771	7.0485	32.82	151.68	321.24	270.78	4	551.947	0		27	7.04317	G A
462	White	No	52.8197	Male	179	106.3	33.1762	Yes	240	5.439	5.4945	5.439	5.0505	4.662	3.2745	3.885	66	72	288	204	162	78	78	288	60		18	26	19	37	33	3.2745	180	15.9544	4.995	6.549	7.4925	6.549	29.94	113.64	232.56	155.94	4	580.253	0	16	20	6.64668	A A
463	White	No	68.6392	Male	174	100.6	33.2276	Yes	120	5.4945	5.6055	5.2725	4.218	3.219			25.92	56.52	41.28		42.18	24	15.54			25	18		16	26	27	3.108	120	6.32966	4.2735	4.995	6.993	7.77		156	150	180	4	551.947	39.1275	24	15		G A
464	White	No	73.45	Male	178	105.68	33.3544	Yes	240	4.8285	4.4955	3.774	2.442	3.108	2.22	3.8295	17.1	45.78	95.46	343.08				343.08	90		17	13	41	51	20	2.9415	90	3.66966	5.106	8.1585	8.436	5.883	10.44	142.08	197.52	65.58	4	624.375	11.655		14	2.36918
465	White	No	55.1031	Female	168.1	94.3	33.3715	Yes	240	4.551	4.551	4.107	3.441	2.7195	3.33	3.996	84.54	140.46	310.92	105.36	84.84	51	35.22	310.92	60	10	42	27	30	27	37	3.108	120	17.0996	4.773	6.2715	5.55	6.8265	66	462	312	354	4	547.785	0	12	25	14.0008	A A
466	White	No	46.9414	Female	169.5	95.9	33.3795	Yes	60	4.884	4.7175	2.997																				2.664	90										N/A						G G
467	White	No	68.5135	Male	168.9	95.3	33.4067	Yes	240	6.8265	6.6045	6.0495	5.7165	5.2725	4.44	3.4965	37.8	44.94	220.56	112.38				220.56	60		16	11				2.775	90	11.4685	4.107	6.882	6.771	1.2765	10.38	234.48	701.28	6.72	4	407.925	0		25	1.8947	A A
468	Black	No	43.5055	Female	158	83.4	33.4081	No	0	5.328							18	22.08	17.22	18.36	69.54	39.18		69.54	120				46	49	39	2.3865	60	4.2624	4.9395	7.437	7.4925	7.326	22.68	201.36	267.42	252.6	4	629.37	36.63		35	4.97902	A A
469	White	No	52.2256	Male	177	104.7	33.4195	Yes	240	5.6055	5.3835	4.884	3.7185	2.8305	3.6075	4.0515	65.76	110.58	666.06	290.16	137.64	73.5	70.98	666.06	60	4.7	15	15				2.997	60	16.383	4.8285	4.662	6.6045	6.438	33.24	9.78	418.32	270.3	4	504.495	0	5.4	11	7.1333
470	Black	No	29.7527	Female	160.5	86.5	33.5789	Yes	240	5.3835	5.217	4.773	4.551	4.8285	4.6065	3.2745	21.06	29.28	32.16					32.16	60	16	13	26	30	34	49	2.109	90	5.03896	6.3825	9.657	9.2685	4.1625	9	315.84	14.28	14.28	4	649.35	0	15	27	2.553	A A
471	White	No	82.1071	Female	146.6	72.2	33.5946	Yes	240	7.2705	6.7155	6.3825	5.439	4.884	3.9405	4.1625	48.36	26.64	26.58	62.1	159.18	47.88	32.76	159.18	120	29	29	20	21	39	33	2.331	90	15.6267	6.3825	9.0465	9.546	9.3795	58.32	146.82	86.1	140.52	0	791.707	25.8075	39	18	16.5434	G A
472	White	No	23.62	Female	157.5	83.5	33.6609	Yes	240	4.218	4.44	4.2735	4.107	3.33	3.1635	3.552	28.8	26.52	52.38	89.64	49.02	25.98	18.42	89.64	90	71	30	30	31	35	30	2.886	120	5.39904	5.8275	8.7135	10.3785	9.6015	240	660	1098	1110	4	792.54	93.24	110	26	62.16
473	White	No	22.3058	Male	181.5	111	33.6953	Yes	240	4.8285	4.884	4.44	3.1635	3.219	3.8295	4.2735	138	84	270	246	204	138	96	270	60		30	33	28	43	30	1.998	180	29.6148	4.44	6.66	6.9375	5.772	31.14	299.28	181.26	213.12	4	543.623	10.8225		19	6.14496	A A
474	White	No	52.1243	Male	171.4	99	33.6987	Yes	120	4.884	4.773	4.6065	4.4955	3.8295			70.08	71.52	62.88	101.22	398.28	54.18	48.84	398.28	120		28	37	53	48	44			15.212	5.0505	7.7145	7.8255	7.7145	45.24	189	209.82	267.78	4	656.01	49.95		45	10.1549	G A
475	White	No	60.8117	Male	173.5	101.5	33.7184	Yes	240	5.661	5.661	5.439	4.884	3.885	3.9405	3.9405	78	222	162	144	66	72	60	222	30	15	44	36	96	55	45	1.998	90	19.6248	4.6065	5.883	6.105	5.55	40.02	427.2	560.16	419.7	4	503.663	0	12	35	8.19343	A A
476	Black	No	47.125	Female	166.7	93.8	33.7545	Yes	90	5.439	4.995	4.8285	2.1645				33.9	25.92	67.86	36.72	57.54	29.28	30.36	67.86	60	21	35	36	31	48	40	2.0535	90	8.19476	6.0495	8.8245	11.655	11.0445	66	252	462	612	4	861.638	135.697	17	32	17.7452
477	White	No	48.8526	Male	178.7	107.9	33.7888	Yes	180	5.106	5.0505	4.884	4.773	4.329	1.998		17.22	15.12	2.46	40.5	60.12	19.8	16.38	60.12	120							2.7195	120	3.90779	5.0505	11.3775	11.8215	6.1605		155.4			4	779.22	173.16				G A
478	Unknown or not reported	Yes	24.2141	Male	178.2	107.3	33.7897	Yes	240	4.1625	4.107	3.2745	2.9415	3.4965	3.774	3.885	215.04	255.96	508.32	347.7	182.16	100.68	374.64	508.32	60			24	14	33	22	2.664	90	39.7824	4.6065	5.439	7.1595	7.0485	25.44	253.5	436.44	205.62	4	551.115	0		12	5.20842
479	White	No	74.8872	Male	163.2	90.1	33.8286	Yes	240	5.772	5.55	4.1625	4.4955	3.774	3.108	3.6075	39.36	137.4	68.94					137.4	30							4.329	90	10.0972	4.4955	7.77	5.994	5.1615	13.68	329.7	78.3	71.16	3	545.288	5.8275			2.73326	G A
480	White	No	76.5793	Male	168.6	96.3	33.8775	Yes	240	6.4935	6.9375	7.1595	6.7155	6.66	5.55	3.9405	21.78	21.78	21.48	26.34	35.88	76.08	31.02	76.08	180	16	36	28	24	33	42	3.552	90	6.28571	5.1615	6.8265	6.3825	5.7165	74.82	279.66	369	282	4	549.45	0	16	32	17.1637
481	White	No	74.0795	Female	163.4	90.5	33.8957	Yes	90	4.995	5.106	4.1625	2.553				64.44	79.02	81.78	83.88	149.52	79.26	47.46	149.52	120		62	57	67	63	58	4.3845	60	14.3057	5.1615	7.7145	9.213	9.435	44.88	214.26	307.32	259.68	4	730.102	110.722		41	10.2955	G A
482	White	No	43.5519	Female	166.2	93.8	33.9579	Yes	120	4.662	4.4955	4.551	4.1625	3.2745					57.66	140.04						16	10	13	12	14	16	3.0525	120		4.1625	6.2715	6.549	4.551	11.16	5.52	60.3	16.56	4	485.347	0	4.2	21	2.0646	G A
483	White	No	26.3306	Male	179.8	109.8	33.9643	Yes	240	6.7155	6.216	4.2735	2.7195	2.2755	3.219	4.3845	25.68	52.5	251.64	110.82				251.64	60							4.1625	180	7.66462	4.0515	6.327	6.8265	6.216	10.26	99.96	145.08	109.86	4	539.46	53.28			1.84748	A A
484	Black	No	73.154	Female	177.8	107.4	33.9735	Yes	240	5.0505	5.0505	4.7175	3.7185	2.9415	3.552	4.0515	43.8	51	72	60	53.4	50.4	41.4	72	60	32	46	50	29	61	56	3.1635	240	9.83164	4.995	5.9385	6.105	6.771	55.86	247.8	222.18	238.38	4	547.785	0	24	64	12.4009	G G
485	White	Yes	39.07	Male	169.9	98.1	33.9846	Yes	240	3.996	3.9405	3.7185	3.108	2.775	3.0525	3.441	4.32										27	28	29	25	19	3.2745	180	0.767232	5.0505	7.8255	7.3815	6.549	16.02	180.42	575.64	240.84	4	617.715	11.655		25	3.59596	A A
486	White	Yes	32.529	Female	162.9	90.2	33.991	Yes	90	4.6065	4.773	3.1635	2.7195				42	47.22	170.94	118.08	84.06	35.64	42.66	170.94	60	15	5	10	5	14	13	2.997	90	8.5988	4.4955	7.659	7.881	5.2725	60	360	144		4	573.592	34.1325	15	21	11.988	A A
487	Black	No	45.8216	Male	187.5	119.5	33.9911	Yes	90	5.328	5.2725	3.8295	2.22				80.76	55.08	80.76	68.58	63.18	127.2	64.8	127.2	180	18		12	28	20	15	2.3865	90	19.124	4.884	6.0495	5.9385	5.3835	36	397.02	405.42	223.98	4	505.327	0	19	20	7.8144	A A
488	White	No	26.13	Female	157.3	84.3	34.0698	Yes	240	5.3835	5.3835	2.886	2.886	3.4965	3.885	4.44	65.58	279.3	138.9	63.9	127.2	54.48	60.3	279.3	30	6.1	31	29	38	43	35	2.7195	90	15.6911	5.0505	7.4925	5.883	5.8275	36.18	311.94	261.84	223.62	4	563.602	0	7.4	22	8.1212	G A
489	Black	No	25.6816	Female	155.5	82.4	34.0774	Yes	120	4.662	4.662	4.662	4.3845	3.33			53.82	34.8	34.26			149.52	45.36			23	31	26	37			3.219	240	11.1515	5.4945	7.215	9.0465	8.9355	44.04	203.88	597	459	4	702.63	43.29	16	29	10.7546	A A
490	White	No	52.2228	Female	160.1	87.5	34.137	Yes	240	4.4955	4.4955	4.2735	2.9415	2.886	3.552	3.6075	22.62	26.28	14.34	45.12	20.4	10.92	24	45.12	90	16.6						3.4965	240	4.51948	5.328	7.437	8.325	7.1595	108	336	552	480	4	642.69	3.33			25.5744	A A
491	Black	No	66.8296	Male	167.3	95.6	34.1559	Yes	240	6.549	6.3825	6.4935	5.772	5.1615	3.8295	3.774	25.56	27.24	32.52	56.1	176.28			176.28	120	4	40	37	74	63	58	2.6085	120	7.43966	4.9395	7.326	4.329	4.3845	17.1	152.4	153.42	40.56	4	490.342	0	3.9	36	3.75402
492	Asian	No	20.1373	Male	179.5	110.2	34.2021	Yes	240	4.8285	4.8285	4.4955	4.1625	3.9405	3.3855	4.1625	61.92	48.24	95.34	63.12	41.64	36.54	28.74	95.34	60	25	24	17	51	36	38	3.2745	180	13.288	4.218	6.882	8.658	8.547	102	744	1164	1596	4	656.01	149.85	20	18	19.1216	A A
493	Black	No	42.12	Male	168.1	96.9	34.2916	Yes	60	4.773	4.8285	3.441					12	12.6	13.2	10.2	7.8	25.2	14.4	25.2	180	15		24	33	29	26	3.1635	90	2.5456									N/A						A A
494	White	No	54.1202	Female	165.1	93.6	34.3385	Yes	240	5.994	5.994	4.0515	2.7195	3.441	4.329	4.884	49.2	46.2	53.4	72	234	78	48.6	234	120	9.5	25	5	18	22	22	3.2745	240	13.1069	4.7175	6.327	7.104	4.107	48.6	210	306	120	4	490.342	0	8.1	18	10.1898	A A
495	Black	No	23.8745	Female	166.5	95.4	34.4128	Yes	240	5.217	5.217	4.884	3.663	2.664	4.0515	3.9405	56.4	72	318	174	84	57.6	57	318	60		11	10		10	13	2.442	90	13.0773	5.1615	8.3805	11.322	10.2675	38.22	425.16	507.96	650.34	4	806.692	187.312		16	8.76767	A A
496	White	No	62.17	Female	168.4	97.6	34.4164	Yes	240	5.106	5.1615	4.1625	2.22	2.3865	3.2745	3.8295	9.9	11.76	15.42	26.1	63.36	41.52	7.38	63.36	120	13	28		55	43	48	2.6085	120	2.24664	5.0505	7.326	8.103	7.0485		232.44	472.56	190.56	4	628.537	22.4775	11
497	Asian	No	44.8058	Female	157.4	85.3	34.4302	Yes	120	5.7165	5.4945	4.995	3.441	2.6085			49.08	122.58	651.9							12	22	22				3.219	120	12.4696	3.996	6.1605	6.66	4.995	18.24	106.14	261.06	69.66	4	494.505	14.985	11	43	3.23942	A A
498	White	No	36.373	Female	175.8	106.5	34.4597	Yes	240	5.2725	4.995	3.0525	2.775	3.4965	3.996	4.107	129.84	672.18	322.44	211.44	58.56	47.28	61.98	672.18	30							2.4975	60	30.4258	5.106	5.6055	6.8265	6.438	34.98	105.42	375.84	277.8	2	540.293	0			7.93813	A A
499	Black	No	53.3399	Female	166.2	95.2	34.4647	Yes	60	4.8285	4.7175	3.2745																				3.33	240										N/A
500	Black	No	46.6539	Female	169.3	99	34.5399	Yes	240	5.217	5.1615	4.884	4.8285	4.662	4.107	4.0515	50.16	101.52	131.7	93.96	29.16	26.34	34.92	131.7	60							2.886	120	11.6304	4.2735	6.327	7.6035	6.66	74.46	449.28	414.66	74.22	4	567.765	54.945			14.1424
501	White	No	66.6159	Male	170	100	34.6021	Yes	120	5.994	5.6055	5.0505	3.2745	2.3865			21.54	49.56	151.8	34.32	38.34	30.54	28.02	151.8	60	43.8						1.7205	60	5.73826	7.9365	10.212	13.098	14.5965	55.2	150	234	336	4	1059.77	107.393			19.4709	A A
502	White	No	24.6659	Male	171.5	101.9	34.6454	Yes	90	4.44	4.329	4.107	2.664				92.58	89.82	103.68	108.06	245.28	216.3	80.46	245.28	120		60	49	69			1.776	60	18.2691	4.884	12.7095	12.3765	4.884	30	567.6	701.34	157.26	4	786.712	200.632		45	6.512
503	White	No	51.5766	Female	162.5	91.8	34.7645	Yes	240	5.106	5.0505	4.773	4.2735	3.33	3.219	3.774	50.4	39	41.4	46.8	57.6	90	72	90	180		32	35	64	56	35	3.441	240	11.4374	4.995	6.9375	5.772	5.4945	31.92	221.7	227.88	160.74	4	534.465	0		36	7.08624	G A
504	Black	No	30.6838	Female	161.3	90.5	34.784	Yes	240	4.8285	4.8285	3.8295	2.886	3.4965	3.4965	3.885	28.8	60.78	94.56	71.76	65.64	22.2	27.72	94.56	60	20	39	50	84	63	65	3.0525	120	6.18048	4.773	5.6055	6.216	6.1605	95.64	400.74	452.82	697.14	4	517.815	0	22	43	20.2884	A A
505	Black	No	44.2856	Female	170.4	101	34.7842	Yes	240	4.6065	4.4955	4.551	4.107	4.1625	3.8295	3.2745	76.92	65.1	115.86					115.86	60	8.4	21	20	28	71	49	2.442	120	15.7481	4.4955	5.661	7.9365	6.882	14.16	104.4	84.18	63.84	4	562.77	23.31	6.2	18	2.82917	A A
506	White	No	45.252	Male	182.5	116.1	34.8583	Yes	240	5.661	5.55	5.439	4.662	3.2745	3.2745	3.6075	24.24	79.14	100.62	67.98				100.62	60	1.9	5	20				2.886	90	6.09878	4.7175	6.7155	7.7145	5.9385	7.74	61.56	106.2	47.1	4	566.1	0	2.9	36	1.62282	G A
507	unknown or not reported	Yes	46.3637	Male	178	110.5	34.8756	Yes	240	5.4945	5.439	5.217	5.0505	4.884	4.4955	3.9405	15.72	38.46	38.46	38.76	30.24	20.4	1.98	38.76	90	5.3	33	35	50	50	41	2.4975	90	3.83882	4.551	6.771	9.102	10.4895					4	722.61	176.49	4.9	30		G A
508	White	No	39.1274	Male	178.6	111.3	34.8925	Yes	90	4.773	4.4955	4.3845	1.776				57.66	31.62	305.46	266.16	190.38	70.98	53.4	305.46	60							3.2745	90	12.2316	5.1615	6.66	6.3825	7.9365	41.04	224.7	197.52	339.66	4	611.055	0			9.41458	A A
509	Black	No	55.2645	Female	167	97.4	34.9242	Yes	240	5.9385	5.4945	5.328	5.1615	4.8285	3.885	4.1625	9.6	8.52	13.02	53.22				53.22	90	7.5	30	34	28	33	31	3.7185	120	2.53376	3.9405	8.2695	7.548	4.9395	7.2	63.06	50.7	36.3	4	568.598	95.7375	8.3	31	1.26096	G A
510	White	No	24.5263	Female	169.1	100.1	35.0064	Yes	240	4.3845	4.107	4.2735	3.885	3.663	2.664	3.1635	18.54	60.78	41.28	52.2	13.2	23.76	20.88	60.78	30									3.61283	4.662	6.2715	7.3815	7.659	162.72	621.54	1463.76	1668.54	4	598.567	39.1275			33.7156	A A
511	Black	No	48.3377	Male	188.5	124.4	35.0104	Yes	240	6.327	6.105	5.772	5.9385	5.883	5.439	4.107	118.56	36.3	55.98	438.3	194.82			438.3	90		33	13	38	42	48	2.2755	120	33.3391	4.44	6.6045	8.769	8.991	18.96	106.26	279.36	204.42	4	666	133.2		39	3.74144	G A
512	White	No	48.8771	Male	183	117.3	35.0264	Yes	120	5.55	5.4945	5.0505	3.9405	2.7195			52.92					70.38	47.46				41	40	47	56	49	2.664	60	13.0536	6.1605	8.214	9.99	8.6025	37.62	297.54	292.02	635.04	4	746.753	7.4925		45	10.3004	G A
513	White	No	75.3307	Female	159.5	89.2	35.0625	Yes	240	6.105	5.7165	2.664	2.8305	3.3855	4.0515	4.6065	204	252	348	270	906	432	180	906	120	14	27	5	43	45	30	2.3865	120	55.352	4.9395	5.8275	6.549	2.8305	24.36	162.9	199.38	294.66	4	432.068	0	7.7	15	5.34783	A A
514	White	No	56.9375	Male	167.8	99	35.1602	Yes	240	5.994	5.994	5.1615	4.1625	3.552	3.9405	4.6065	8.1	4.44	47.1					47.1	60		35	29	29	43	33	2.0535	90	2.15784	4.6065	5.7165	5.772	5.9385	12.72	139.14	234.6	110.22	4	505.327	0		17	2.60421
515	White	No	52.4883	Female	170.5	102.3	35.1906	Yes	90	4.884	4.773	3.33	1.7205				24.54	37.86	171.78	26.04				171.78	60		33	30	37	38		2.7195	60	5.32682	4.9395	7.881	9.3795	5.994	2.4	452.58	491.22	176.16	4	631.035	38.295		22	0.52688	A A
516	White	No	71.4484	Male	162.9	93.6	35.2723	Yes	240	6.993	6.8265	6.105	5.439	4.7175	3.441	3.7185	16.68	16.02	22.98	33.3	35.58	35.52	21.48	35.58	120	20	29	36	27	36	31	2.7195	90	5.18414	5.994	8.436	11.5995	11.988	120	300	558	792	0	876.622	157.342	27	38	31.968
517	White	No	29.4735	Male	192	130.1	35.2919	Yes	240	5.2725	5.2725	4.7175	4.0515	3.996	4.6065	4.44	34.8	228	156	50.4	300	84	66	300	120		35	40	60	50	55	2.22	90	8.1548	5.3835	7.548	7.2705	5.661	31.56	240.72	417.84	197.34	4	586.08	0		39	7.55126	A A
518	White	No	63.1305	Male	176	109.5	35.3499	Yes	240	6.7155	6.6045	6.3825	6.0495	5.3835	4.4955	4.551	96	132	180	186	204	138	90	204	120	7.6	12	13	12			3.552	240	28.6528	4.773				29.34				4			6.9	17	6.22399	A A
519	White	No	58.4215	Female	164.1	95.254	35.3725	Yes	240	5.2725	5.106	3.0525	2.3865	3.8295	3.996	4.44	66.78	115.02	132.3	151.8	50.34	58.32	174.06	174.06	240							3.0525	120	15.6488	4.773	7.326	4.9395	4.2735	25.5	433.14	84.48	44.7	4	493.673	0			5.4094
520	White	No	83.3965	Male	169.9	102.2	35.405	Yes	240	5.217	4.995	4.107	2.8305	2.775	3.3855	3.885	27.6	28.32	63.66	10.32	52.38			63.66	60							2.553	240	6.39952	4.995	9.435	7.659	7.992	18.6	287.94	82.38	72.72	0	712.62	113.22			4.1292	G A
521	White	No	22.3168	Male	179.6	114.5	35.4971	Yes	240	4.9395	4.551	4.0515	3.108	3.1635	3.996	4.2735	7.86	7.14	7.32	33.96	39.42	23.58	18.06	39.42	120	46	32	46				3.774	240	1.72553	6.216	8.658	8.103	4.773	240.3	373.62	573.66	148.98	4	617.715	0	100	34	66.3869	A A
522	Black	No	49.6602	Female	164.7	96.3	35.5009	Yes	0	4.2735	4.218						33	62.16	174.54	227.22	79.86	26.28	28.92	227.22	90	24	43	44	67	48	39			6.2678	5.55	9.6015	9.4905	8.1585	74.52				4	758.407	92.4075	19	37	18.3816	A A
523	White	No	24.5452	Male	183	118.9	35.5042	Yes	240	4.662	4.7175	2.3865	2.8305	3.1635	3.7185	3.996	161.4	128.88	311.46	308.4	276.96	133.08	90	311.46	60	4.6						2.553	60	33.4421	4.773	6.4935	7.8255	7.104	29.4	162	234	180	4	596.903	24.1425			6.23672
524	White	No	43.1302	Male	168.4	100.7	35.5096	Yes	240	6.1605	6.0495	5.772	5.106	4.7175	4.2735	3.996	15.18	22.68	42.12	19.2	34.14	17.7	20.7	42.12	60	56	106	89	212	138	144	3.108	120	4.15628	4.884	7.881	8.4915	7.8255	162.3	1899.84	2066.88	2154.6	3	671.828	85.7475	53	78	35.2299	A A
525	Asian	No	27.4093	Female	166.6	98.6	35.5244	Yes	240	4.3845	4.44	4.218	4.218	4.107	3.4965	2.997	10.8	19.02	97.56	67.86				97.56	60	9.9	21	20				3.33	180	2.10456	3.4965	8.991	3.885	7.4925	10.2	457.74	21.9	38.7	4	605.227	185.647	8	23	1.58508	A A
526	White	No	70.4955	Male	173	106.5	35.5842	Yes	240	5.883	5.9385	5.439	3.9405	2.8305	5.55	4.3845	33.6	162	162	57.6	33.6	40.2	33.6	162	30	68	32	13				2.553	120	8.78528	4.4955	6.6045	6.3825	3.9405	76.14	331.44	482.7	87.96	4	479.52	0	33	25	15.2128
527	White	No	51.3331	Male	162.5	94.2	35.6734	Yes	240	5.439	5.7165	5.328	4.3845	3.4965	3.663	4.3845	4.32	145.44	25.26					145.44	30	19	14	23				3.0525	240	1.04429	4.773	7.4925	8.2695	5.9385	12	66	174		0	598.567	25.8075	19	24	2.5456	G A
528	White	No	49.0851	Male	193	133.2	35.7593	Yes	240	5.7165	5.439	5.328	4.995	3.9405	3.552	3.885	35.58	41.88	47.94	104.82	131.34	48.66	42.84	131.34	120	13	34	27	34	36	20	3.552	120	9.03969	4.0515	6.3825	9.1575	8.2695	66	702	1050	1356	3	637.695	151.515	11	28	11.8844	G A
529	White	No	69.3595	Female	157.5	88.8	35.7974	Yes	240	6.3825	6.438	5.772	5.9385	5.4945	3.6075	3.663	12.6	10.2	25.8	19.8	10.2	5.4	3.6	25.8	60	10	22		43	24	26	3.8295	240	3.5742	4.107	5.7165	5.439	4.4955			204.12	119.4	4	449.55	0	7.7	51		G A
530	Black	No	62.6188	Female	165.9	98.6	35.8248	Yes	120	5.217	5.3835	3.9405	2.7195	2.4975			9.36	13.2	140.52	21.96	24.36	23.58	22.98	140.52	60		27					3.441	180	2.17027	5.217	8.436	10.3785	5.328	110.88	819.6	1567.68	339.48	4	646.853	20.8125		68	25.7094	A A
531	White	No	70.4216	Male	173.2	107.6	35.8688	Yes	240	6.549	6.2715	5.217	3.8295	3.108	3.6075	4.1625	24.78	47.64	223.5					223.5	60	48	5	14	13	14	12	3.1635	120	7.21263	6.0495	7.6035	7.4925	10.6005	11.4	54.6	78	156	4	749.25	23.31		11	3.06508	A A
532	White	No	28.4851	Female	174.3	109	35.8783	Yes	240	5.217	4.9395	4.44	2.886	3.108	3.774	4.1625	2.82	66.84	59.52	11.88	42.96	74.22	75.9	75.9	240		17	10	13	29	20	2.22	90	0.653864	5.106	7.6035	6.8265	6.4935	29.94	239.46	268.32	124.5	4	601.898	0		23	6.79438	A A
533	Black	No	63.1224	Female	161.9	94.1	35.9001	Yes	240	4.6065	4.6065	4.218	3.4965	2.9415	2.7195	2.997	29.7	30.48	230.1					230.1	60	9.7	17	14	15	26	23	3.1635	180	6.08058	3.9405	4.884	5.8275	5.9385	17.58	145.44	180.66	123.96	4	471.195	0	9.9	27	3.07884	A A
534	Black	No	47.8641	Female	153.8	85	35.9341	Yes	0	4.995							27.54	32.46	64.2	225.9	47.4			225.9	90							1.7205	120	6.11388	5.1615	7.659	5.9385	4.9395	18.66	368.46	243.06	180.36	0	544.455	0			4.2806
535	Black	No	42.21	Male	179.7	116.1	35.9531	Yes	120	4.773	4.8285	4.551	3.6075	2.331				58.98			141.84	67.08					13		20			2.997	120		4.8285	8.658	8.103	2.886	22.2	115.62	240.72	5.34	4	540.293	0		13	4.76412
536	White	No	44.2228	Female	162.7	95.4	36.039	Yes	240	5.661	5.439	4.6065	2.6085	3.108	3.8295	4.107	35.52	51.3	53.22	127.92	41.94			127.92	90	20	14	22				1.9425	90	8.93683	5.106	7.8255	10.1565	10.3785	19.02	191.52	273.12	576.42	4	775.058	162.337	23	16	4.31627	A A
537	White	No	56.5952	Female	161.4	93.9	36.0461	Yes	240	5.1615	5.106	4.995	4.884	4.8285	3.8295	3.3855	6.12	12.18	26.4	79.68	40.62			79.68	90	10.1						2.886	180	1.40393	4.7175	7.659	7.548	6.4935	21	162	216	156	4	608.558	42.4575			4.403
538	White	No	61.25	Female	153	84.4	36.0545	Yes	240	4.6065	4.6065	4.107	3.663	2.7195	3.441	3.663	21.6	16.2	120	108				120	60	9.8	18	11	28	23	22	2.3865	90	4.42224	4.9395	7.2705	8.8245	6.438	8.28	113.28	187.38	115.2	4	617.715	24.975	7.3	18	1.81774	A A
539	Black	No	49.6793	Female	164.9	98.3	36.1503	Yes	60	5.1615	4.8285	3.2745					43.5	90.12	66.72	53.4	49.68	32.82	29.46	90.12	30	29	41	51	40			2.9415	120	9.9789	5.772	8.0475	9.9345	6.9375	70.26	222.24	528.96	704.64	4	685.148	0	36	35	18.024	A A
540	Black	No	28.09	Female	166.37	100.69	36.3778	Yes	240	4.7175	4.6065	4.3845	3.9405	3.552	3.1635	3.552	61.5	45.72	54.9	65.58	71.94	34.86	31.86	71.94	120	22	30	26	29	31	45	2.8305	180	12.8945	4.44	6.66	6.2715	7.77	84	810	636	642	4	593.572	60.7725	25	31	16.576
541	White	No	23.2339	Female	171.5	107.1	36.4134	Yes	240	5.0505	4.995	3.441	2.7195	3.6075	3.9405	4.44	58.68	49.32	67.14	177.12	261.12			261.12	120	9	20	18	32	21	11	3.2745	90	13.1717	5.2725	8.4915	10.656	12.987	15.6	96	102	108	4	883.283	250.582	11	14	3.6556	A A
542	White	No	69.0363	Male	173	109.3	36.5198	Yes	120	6.3825	6.0495	5.217	4.1625	3.3855						200.46						8.7	23		19			3.552	240		4.662	6.4935	5.7165	6.8265	10.92	93.18	51.78	94.98	4	555.278	0	8.2	22	2.26262	G A
543	White	No	72.09	Female	160.9	94.7	36.5795	Yes	240	5.2725	5.217	4.884	4.551	4.1625	4.0515	4.1625	57	57.6	72	66	90		53.4	90	120	17	17	23	42	24	16	2.7195	90	13.357	4.6065	6.8265	6.2715	6.3825	45.6	300	342	396	4	559.44	6.66	21	5	9.33584	A A
544	Black	No	63.4837	Female	161.6	95.8	36.6845	Yes	240	5.2725	4.995	4.3845	3.108	3.1635	3.663	3.8295	24.96	14.64	44.22	98.4	61.44			98.4	90	10	18	20	19	56	37	3.1635	90	5.84896	4.4955	5.217	7.0485	5.217	20.4	107.04	101.22	120.6	4	486.18	0	14	27	4.07592	G A
545	White	No	78.0632	Male	177.2	115.2	36.6881	Yes	240	5.3835	5.2725	4.884	4.2735	3.8295	3.552	3.774	27.36	88.26	169.2	109.38				169.2	60		15	14	10	30	30	2.6085	90	6.54634	4.9395	3.774	7.1595	7.215	8.34				4	511.155	0		15	1.83091	G A
546	White	No	78.9174	Female	149.4	81.9	36.693	Yes	90	4.9395	4.329	3.219	2.22				104.94	121.08	489.06	548.16	171.36	78	65.1	548.16	90	19	21	11	40	32	32	2.2755	60	23.0378	4.995	6.105	5.6055	6.1605	34.62	266.76	240.6	269.88	4	526.973	0	18	17	7.68564
547	White	No	60.5296	Female	154.5	88.2	36.9498	Yes	90	4.995	4.7175	3.885	1.6095				50.64	79.26	419.94	373.74				419.94	60							4.329	240	11.2421	4.2735	6.9375	6.7155	6.327	12.48	84.66	170.76	111.78	3	562.77	49.95			2.37037	A A
548	White	No	39.5	Female	151.3	84.6	36.9566	Yes	120	4.9395	5.106	4.8285	4.3845	2.8305			19.02	16.8	153.42	37.8		18.06										2.553	90	4.17552	4.884	8.436	6.66	9.0465	23.7	305.22	327.96	161.28	4	697.635	111.555			5.14448	A A
549	White	No	32.53	Male	193.8	139	37.009	Yes	60	5.439	5.4945	3.7185					1.5	51.6	126	57	27.6	12	13.2	126	60							3.8295	180	0.3626									N/A						A A
550	White	No	65.6988	Female	155.4	89.6	37.1027	Yes	240	4.7175	4.551	3.7185	1.9425	2.886	3.4965	4.1625	4.8	1.98	70.8	2.16				70.8	60	11	58	56				3.33	120	1.0064	4.3845	5.661	5.439	3.9405	0.54	133.26	137.16	42.3	4	435.398	0	8.5	27	0.105228	A A
551	White	No	53.04	Male	173.1	111.2	37.1117	Yes	240	5.4945	5.7165	5.4945	4.773	4.329	3.0525	3.4965	9.48	18	15.18	12.96	6.96	2.58	6.48	18	30		21		43	45	31	2.7195	120	2.31502	4.2735	6.8265	7.8255	7.3815		172.5	200.34	206.58	4	607.725	94.905		39		A A
552	White	No	75.9441	Male	174	112.4	37.1251	Yes	240	6.1605	5.994	5.994	5.1615	3.8295	2.7195	3.4965	64.92	66.42	51	87.84	106.14	92.88	65.94	106.14	120	16	104	79	99	100	90	2.4975	120	17.7751	5.2725	9.657	10.434	7.3815	32.52	318.78	767.82	446.34	0	746.753	114.053	14	116	7.62052	A A
553	White	No	49.1317	Male	190.5	134.8	37.145	Yes	240	5.994	6.1605	5.994	5.2725	4.218	4.1625	4.662	51.6	72	642	132	66	59.4	66	642	60	14	12	12	45	27	23	3.2745	120	13.7462	4.9395	7.4925	6.2715	6.771	34.68	560.52	124.02	174.42	4	596.07	3.33	13	21	7.61342	G G
554	White	No	60.6611	Male	169	106.1	37.1486	Yes	240	7.215	6.9375	6.7155	5.9385	5.217	3.774	4.4955	58.8	228	204	204	120	33.6	53.4	228	30		67		80		87	2.6085	180	18.8552	4.9395	8.214	7.881	7.659	43.02	564.06	494.58	668.04	4	668.497	75.7575		64	9.44432	A A
555	White	No	58.835	Female	166.5	103	37.1543	Yes	240	5.7165	5.4945	5.0505	4.0515	3.219	3.885	4.3845	56.4	37.2	26.4	72		55.8	43.8			12	35	40				2.775	120	14.3294	4.6065	6.66	6.6045	6.105	56.4	372	318	264	4	551.115	0	6.7	37	11.547	G A
556	White	No	51.8888	Female	177.4	117	37.1774	Yes	240	5.661	5.4945	5.2725	4.884	4.2735	2.8305	3.774	8.64	9.96	8.94	27.3	86.7			86.7	120	20	21	21				3.219	120	2.17382	4.8285	7.104	6.1605	4.8285	18.54	223.32	462.54	155.82	4	522.81	0	24	16	3.97868	A A
557	Black	No	21.2763	Female	170	107.7	37.2664	Yes	90	4.551	4.2735	3.6075	2.553				27.42	60.66	31.02	22.2	67.26	35.1	30.78	67.26	120		40	25	131	107	87	2.997	90	5.54615	4.995	7.77	7.6035	9.879	77.4	244.8	323.04	924.72	4	718.447	119.048		46	17.1828	G A
558	Black	No	56.7321	Female	156.4	91.2	37.2839	Yes	120	5.439	5.2725	4.44	3.552	2.664													17	19	30	23	18	2.22	90		4.662	6.438	6.882	7.77	16.02	123.42		119.16	4	599.4	39.96		19	3.31934	A A
559	White	No	69.3868	Female	159.1	94.4	37.2934	Yes	240	5.3835	5.1615	4.0515	3.2745	2.886	3.2745	3.663	25.08	34.44	6.9	122.1	134.82	34.92	33.3	134.82	120	21	65	70	105			3.1635	240	6.00081	5.3835	6.1605	6.9375	5.217	65.52	123.6	220.02	93.12	2	526.14	0	24	79	15.6768	A A
560	White	No	62.3914	Female	172.2	110.6	37.2983	Yes	240	7.1595	6.993	6.549	5.3835	4.107	3.1635	4.3845	29.82	110.28	54.9					110.28	30		32	34	50	40	25	2.1645	60	9.48872	5.2725	8.547	6.66	4.9395	11.46	314.34	167.82	45.96	4	583.582	0		39	2.68546	G A
561	White	No	57.33	Female	151.4	85.5	37.3005	Yes	240	5.2725	5.1615	4.9395	3.996	2.997	3.663	4.329	103.26	916.14	523.8	260.88	155.04	104.04	79.92	916.14	30		29	19	28	42	41	3.219	120	24.1973	4.44	6.66	8.6025	10.0455	33.06	58.02	168.84	261.36	4	696.803	164.002		31	6.52384
562	White	No	57.2031	Female	163.1	99.2727	37.3183	Yes	240	7.548	7.548	6.993	6.6045	6.0495	4.995	6.993	33.66	29.16	39.42	41.76	39.72	68.1	39.6	68.1	180	16	15	15	21	36	29	1.887	60	11.2918	5.7165	8.2695	8.88	8.0475	50.82	182.94	327.06	355.98	4	708.458	22.4775	17	12	12.9117	G A
563	Black	No	47.7985	Male	121.6	55.2	37.3312	Yes	60	5.106	4.6065	2.331					15.18	20.1	24.72	38.46	50.34	12.3	11.52	50.34	120							3.441	90	3.44485									0						G A
564	Black	No	45.6436	Female	164.5	101.1	37.3611	Yes	240	5.439	5.55	5.217	4.995	4.3845	3.552	4.1625	72	84	168	180		57	60				14		24	23	28	1.7205	90	17.4048	5.217	7.992	8.6025	8.88	35.7	283.74		680.1	4	713.453	87.4125		23	8.27764	A A
565	Black	No	26.629	Male	171.8	110.5	37.4383	Yes	240	4.551	4.551	3.9405	2.7195	3.441	3.0525	3.441	29.94	66.36	67.44	115.38	211.86			211.86	120		20	15	17	40		3.2745	90	6.05586	4.7175	4.8285	5.772	5.661	17.58	26.46	88.68	20.34	4	472.028	0		16	3.68594	G A
566	White	No	61.4358	Female	169.5	107.6	37.4518	Yes	240	6.549	6.2715	5.439	4.662	4.0515	3.2745	4.107	126	120	180	174	180	204	162	204	180		24	11	50	25	23	1.998	120	36.6744	4.1625	5.4945	5.328	4.4955	29.46	220.92	269.46	205.62	4	442.058	0		21	5.4501	G A
567	White	No	24.2468	Female	161.4	97.9	37.5816	Yes	240	4.551	4.7175	4.6065	4.44	4.329	3.996	3.4965	127.44	275.22	465.42	318.78	322.8	160.26	59.58	465.42	60		10					2.1645	120	25.7769	4.0515	5.994	3.9405	5.0505	46.5	307.2	418.2	224.4	4	451.215	0		13	8.3731	G A
568	White	Yes	32.707	Female	150	84.6	37.6	Yes	240	4.884	4.773	4.3845	3.3855	3.441	3.3855	3.8295	114	78	144	222		120	43.8									3.0525	60	24.7456	4.995	7.7145	7.3815	5.9385	51.12	205.86	261.06	232.08	0	595.237	0			11.3486	G A
569	White	No	66.54	Male	176.1	116.8	37.6638	Yes	240	7.215	6.9375	7.2705	6.6045	6.549	4.1625	3.774	39.84	30.42	55.98	104.94	71.58	33.78	30.66	104.94	90	11	25	21	25	49		3.33	120	12.7754	5.7165	8.547	6.8265	5.106	68.22	341.22	294.06	160.98	4	597.735	0	14	22	17.3324	A A
570	Black	No	45.3425	Female	171	110.3	37.721	Yes	240	5.328	5.2725	4.7175	3.7185	2.9415	3.552	3.3855	102	120	240	216	210	132	114	240	60	9.9	22	25				2.3865	60	24.1536	4.7175	6.438	7.104	6.882	27.42	172.98	300.96	331.68	4	576.922	10.8225	9	5	5.74906	A A
571	White	No	35.2396	Female	163	100.3	37.7508	Yes	240	4.8285	4.773	4.4955	4.107	3.441	2.886	3.441	4.74	100.98	124.86	167.16	243	96.78	64.56	243	120	12	30	34	37	50	43	2.1645	120	1.0172	5.1615	7.659	8.547	4.662	34.14	342.96	353.82	25.14	4	575.257	0	14	21	7.83172	A A
572	Black	No	23.9211	Male	177	118.3	37.7605	Yes	240	5.3835	5.3835	4.773	4.0515	3.441	4.107	4.551	60	60	120	120	126	90	114	126	120	18	30	34	28	47	37	3.885	120	14.356	5.772	10.4895	11.766	6.438	22.44	154.44	289.26	174.72	4	770.895	78.255	13	12	5.75661	A A
573	White	No	66.7995	Male	170.6	109.9	37.7607	Yes	240	5.2725	5.55	5.0505	5.0505	4.7175	3.885	3.1635	21.06	16.62	11.88	19.14	157.02			157.02	120		70	41	53	90	87	3.108	90	4.93506	4.2735	6.216	5.439	4.218	19.8	226.5	203.16	43.68	4	458.707	0		61	3.76068	A A
574	White	No	59.9191	Male	163.8	101.6	37.8674	Yes	240	5.9385	6.105	6.105	5.3835	4.4955	4.2735	3.996	24.42	49.62	126.12					126.12	60	14	22	19				2.7195	90	6.44525	5.1615	7.326	5.9385	5.2725	12.54	151.26	136.68	46.14	4	544.455	0	12	24	2.87668
575	Black	No	53.1455	Male	167.5	106.4	37.9238	Yes	240	5.106	4.9395	4.7175	3.7185	3.774	4.0515	4.107	28.2	180	744	288	114	150	108	744	60							2.886	180	6.39952	4.9395	6.9375	7.0485	6.882	26.88	283.08	215.4	298.8	4	594.405	1.665			5.90106	A A
576	White	No	67.8919	Female	159.5	96.5	37.932	Yes	240	5.1615	5.439	4.662	3.441	3.219	3.2745	3.6075	6.18	16.68	10.56	66				66	90		18	16	24	26	22	2.0535	90	1.41769	4.6065	5.661	3.108	4.3845	7.68	119.52	13.62	39.54	4	417.082	0		23	1.57235	G A
577	unknown or not reported	Yes	18.5111	Female	157.5	94.1	37.934	Yes	90	4.6065	4.7175	4.3845	3.108				54.24	95.52	257.22	169.8	151.32			257.22	60	10	20	24				2.442	90	11.1047	4.9395	7.77	8.1585	4.773	17.28	259.74	802.44	9.54	4	572.76	0			3.79354	A A
578	White	No	71.3471	Female	160.6	98.1	38.0345	Yes	60	4.7175	4.4955	2.9415					10.14	11.34	16.02	31.26	34.44	17.58	15.42	34.44	120	4	22	22	27	35		4.6065	240	2.12602									N/A						A A
579	White	No	55.2125	Female	165	104.2	38.2736	Yes	240	5.8275	6.105	5.1615	4.884	4.44	4.6065	4.9395	90	84	96	96	102	114	258	258	240		38	40	42	42	32	3.33	120	23.31	4.107	6.0495	5.217	3.552	28.74	443.52	183.66	21.54	4	427.905	0		38	5.24601
580	Black	Yes	26.232	Female	149.86	86.18	38.3738	Yes	240	4.1625	3.885	2.997	2.4975	2.886	2.997	3.2745	25.5	25.86	34.44	60.78	78.06	38.7	29.82	78.06	120		47	48	38	57		3.219	180	4.7175	6.438	11.0445	5.439	7.659	62.1	549.3	530.94	192.3	4	739.26	0		30	17.7689	G A
581	Black	No	28.5152	Male	193	143.1	38.4171	Yes	120	5.3835	5.439	5.217	3.33	2.0535				57.9	120.54	72.06	80.52	46.68	31.44	120.54	60	77	56	89	75	155	93	2.22	180		5.994	7.215	9.0465	7.6035	62.94	173.88	314.76	208.56	4	670.162	0	54	59	16.7672	A A
582	Black	No	45.8874	Male	193.5	145.3	38.8064	Yes	90	4.1625	4.1625	2.8305	2.0535				24.24		101.52			34.38	34.62			14	12	23	31	27	16	2.997	90	4.4844	4.2735	6.438	7.437	7.4925	78	618	846	864	4	593.572	80.7525	14	18	14.8148	G A
583	White	No	68.7844	Male	170.6	113.6	39.032	Yes	240	6.216	6.1605	3.663	5.4945	4.3845	3.3855	3.8295	3.42	9.9	38.58					38.58	60	7.1	23	24		26	30	2.997	180	0.944832	4.884	7.2705	7.659	6.105	11.82	98.52	113.16	76.32	4	589.41	3.33	5.6	5	2.56573
584	White	No	54.1065	Female	149.5	87.4	39.1047	Yes	240	7.4925	7.3815	5.217	4.107	3.108	3.33	4.218	162.84	21.3	247.14	313.32	238.86	132.96	106.74	313.32	90	20	25	31	37	46	46	3.1635	180	54.2257	4.551	7.1595	8.1585	5.6055	29.34	293.94	296.1	129.54	4	573.592	27.4725	14	22	5.9345	A A
585	White	No	61.0663	Male	162.2	103.2	39.2264	Yes	240	5.106	4.6065	2.4975	2.7195	3.219	3.7185	3.9405	31.5	29.34	36.96	61.32	47.88	21.12	22.14	61.32	90	39	32	23	31	48	40	2.442	60	7.1484	5.994	8.0475	9.99	10.212	111.06	112.38	266.28	429.18	4	787.545	68.265	30	26	29.5864	A A
586	Asian	No	24.7178	Female	151.8	90.4	39.2306	Yes	240	6.105	5.994	5.217	4.2735	3.663	3.552	4.0515	27.42	41.46	88.68	98.34	102.48		40.08	102.48	120		34	33	60	44	38	3.996	120	7.43996	4.6065	6.8265	6.4935	3.885	62.04		370.32	76.14	4	487.845	0		45	12.7017
587	White	No	37.2411	Female	158.2	98.6	39.3971	Yes	240	6.771	6.549	6.3825	6.1605	5.772	5.439	4.773	15.96	11.52	91.62					91.62	60		30	16	44	49	45	3.9405	90	4.8029	4.9395	6.327	4.995	6.8265	12.6	122.64	52.44	169.86	4	543.622	0		38	2.76612
588	Black	No	57.3399	Female	163	105	39.5197	Yes	90	4.995	4.884	3.7185	2.4975				111	141.12	176.52	343.44	206.22	81.18	74.16	343.44	90	14	15	20	26	28	31	2.553	90	24.642	4.7175	6.216	6.7155	8.0475	32.52	187.8	213.9	458.46	4	599.4	33.3	10	16	6.81836	G A
589	White	No	48.2118	Female	162.4	104.4	39.5848	Yes	240	4.995	4.7175	3.4965	2.553	2.9415	3.9405	4.2735	38.1	48.66	151.98	109.26	21.48	24.24	26.94	151.98	60	35	11	15	19	33	15	3.441	180	8.4582	5.9385	7.659	6.438	7.2705	84.42	481.62	307.02	212.52	4	633.533	0	24	13	22.2813	A A
590	Black	No	46.5335	Male	174.8	121	39.6007	Yes	60	5.1615	4.9395	1.887					19.8	26.4	34.8	53.4	66	7.2	13.8	66	120	15	36	39	43	48	81	2.9415	90	4.54212									N/A						A A
591	White	No	48.8551	Female	164.1	106.7	39.623	Yes	240	8.2695	7.992	7.2705	6.2715	5.4945	3.996	4.2735	74.28	71.1	62.94	80.88	51.24	142.86	84.42	142.86	180		22	20	38	22	23	2.0535	90	27.3004	4.884	5.439	4.3845	5.55	29.34	221.22	50.46	93.6	4	468.697	0		15	6.36874	A A
592	White	No	39.28	Female	159.5	100.9	39.6616	Yes	120	4.773	4.6065	3.9405	3.0525	2.442				31.38	30.12	40.38	49.08	70.56	33.9	70.56	180	39	25	13				3.1635	180		4.4955	6.549	8.4915	3.6075	74.7	921.48	1548.42	185.4	4	499.5	0			14.9251
593	White	No	50.3309	Male	180.5	129.4	39.7173	Yes	240	4.8285	4.773	3.7185	2.442	3.3855	3.552	3.552	29.1	155.16	140.94	125.46	57.18	38.16	44.76	155.16	30			16	19			3.1635	120	6.24486	5.1615	8.8245	6.9375	6.8265	47.82	820.38	1172.04	290.82	4	651.015	31.635		22	10.9699	A A
594	Black	No	42.4429	Male	187	139.9	40.0069	Yes	240	5.1615	5.217	4.9395	4.3845	3.996	3.996	3.33	30.54	42.9	37.32	31.2	89.28			89.28	120		40	23				3.552	240	7.00588	4.2735	6.3825	7.9365	7.992	20.94	128.64	199.5	170.1	4	614.385	101.565		50	3.9772	A A
595	White	No	24.7727	Female	162.6	105.9	40.0548	Yes	120	4.4955	4.551	4.0515	3.108	2.4975			28.74	167.88	177.18	117.78	78.72	31.38	54.96	177.18	60		21		21	21	20	3.441	180	5.74225	6.438	10.989	13.8195	17.8155	31.8	102.12	118.56	242.58	4	1168	395.438		10	9.09904	A A
596	White	No	41.9119	Male	181.7	132.3	40.0728	Yes	240	5.328	5.55	5.3835	5.1615	5.1615	3.0525	4.1625	38.94	57.6	61.86	48	116.7	103.86	33.66	116.7	120		51	52				4.4955	180	9.22099	4.329	7.326	8.3805	5.883	79.02	627.96	561.06	367.98	4	586.913	67.4325		79	15.2034	A A
597	White	No	62.0218	Female	160	103	40.2344	Yes	240	6.0495	5.772	5.439	4.995	4.6065	4.2735	3.3855	102	138	168	144	114	90	114	168	60		18	23				3.552	120	27.4244	4.995	8.214	8.436	9.435	26.1	129.24	136.62	280.74	4	730.935	131.535		26	5.7942	G A
598	Black	No	52.6254	Female	160	104.4	40.7812	Yes	240	4.995	4.9395	4.6065	3.885	3.1635	3.7185	4.107	24	48	45	52.2	37.2	96	39	96	180	52	32	30	73	38	27	3.0525	90	5.328	4.884	8.658	7.9365	7.215	60	480	390	624	4	668.497	82.4175	30	28	13.024	A A
599	Black	Yes	55.97	Female	159.2	103.6	40.8765	Yes	240	5.9385	5.9385	5.6055	4.44	3.6075	3.663	4.2735	106.68	130.08	318.66	215.7	192.72			318.66	60		10	21	22	24	26	3.8295	180	28.1564	5.328	6.3825	8.769	8.7135	15.84	39.9	62.4	88.2	4	664.335	24.975		51	3.75091	A A
600	White	No	22.9628	Female	163	109.2	41.1005	Yes	240	4.995	5.439	5.6055	5.439	3.996	4.107	3.9405	66.78	97.92	157.32	135.9	68.64	162.12	76.92	162.12	180	7.1	28	22	20		42	3.9405	180	14.8252	4.551	5.994	6.6045	5.994	33.54	257.58	438.24	149.76	4	526.973	0	6.2	48	6.78402	G A
601	Black	No	50.717	Female	167	114.8	41.1632	Yes	90	4.8285	4.6065	3.774	2.442				92.16	128.1	276.42	239.4	203.64	80.58	60.66	276.42	60		30	38	44	52	56	3.108	120	19.7775	6.6045	10.9335	13.986	14.541	27.6	72.84	97.74	131.64	4	1073.09	280.553		32	8.10152	G A
602	White	No	58.4598	Female	162.5	108.7	41.1645	Yes	120	6.2715	5.883	4.7175	3.108	2.331				85.5	118.08	401.52		103.14					35	33	75	68	56	3.1635	180		4.662	6.0495	7.659	8.325	22.44	93.24	214.2	254.94	4	616.05	56.61		25	4.64957	A A
603	Black	No	37.0275	Male	173.4	124.1	41.2737	Yes	90	4.2735	4.329	4.0515	2.664				17.04	27.12	24.18	18.54	24.24	108.6		108.6	180	11	17	30	28	19	23	2.7195	90	3.23646	5.55	10.989	13.875	13.1535	18.6	102	288	558	4	1015.65	349.65	10	34	4.588	G A
604	Asian	No	26.35	Male	172.3	122.7	41.3308	Yes	240	4.3845	4.773	4.2735	2.997	3.2745	3.7185	4.0515	49.8	109.86	215.4	126.72	39.72	38.58	44.16	215.4	60			15	36	30	20	4.1625	240	9.70436	5.2725	6.9375	7.4925	6.66	47.52	654.78	781.26	293.88	4	599.4	0		19	11.1355	A A
605	Black	No	35.0616	Female	164	112	41.6419	Yes	240	4.995	5.106	4.773	4.662	4.662	4.4955	3.3855	34.8	43.32	38.76	94.44	44.52	72.42	20.82	94.44	90	74	48	49	45	59	56	2.7195	90	7.7256	5.2725	7.992	9.99	8.9355	144	690	1050	810	4	736.763	104.062	54	40	33.744	A A
606	White	No	37.6984	Male	171.5	123.5	41.9893	Yes	240	5.661	5.4945	5.217	3.885	3.1635	3.8295	4.3845	72	114	258	150	114	66	66	258	60		12		33	23	15	3.219	60	18.1152	4.995	7.104	7.2705	6.66	34.2	130.56	108.9	173.88	4	596.903	0		16	7.5924	A A
607	White	No	34.4182	Female	160.2	107.8	42.0043	Yes	240	4.9395	5.0505	4.551	3.552	2.664	3.552	3.996	6.84	15.12	26.1	18.84	10.26	14.82	26.04	26.1	60	19	25	17				2.775	180	1.50161	4.995	5.7165	6.2715	5.661	107.7	132.18	150.18	161.7	4	510.322	0	24	42	23.9094	A A
608	White	No	54.7883	Female	166.5	116.5	42.024	Yes	240	5.883	5.772	5.3835	4.44	3.108	4.0515	3.996	39.54	117.3	106.5	59.94	19.02	24.6	27.78	117.3	30	23.6						4.4955	240	10.3384	7.548	11.0445	13.542	15.984	60	180	222	228	4	1127.2	221.445			20.128	A A
609	White	No	40.0665	Female	166.5	116.6	42.0601	Yes	240	4.6065	4.44	4.329	3.33	3.108	3.663	3.996	72	258	450	252	186	114	108	450	60	8.3	37					2.9415	120	14.7408	3.774	5.106	6.438	5.2725	35.34	180.96	222.84	230.58	4	464.535	11.655	7.3	25	5.9277	A A
610	White	No	56.995	Male	177	132.7	42.3569	Yes	240	17.9265	17.649	16.9275	16.5945	15.207	13.32	11.433	47.4	43.2	72	168	186	84	60	186	120		37	47	64	49	56	2.7195	120	37.7652	4.773	6.882	6.771	6.549	38.4	890.22	484.98	272.28	4	576.09	3.33		44	8.14592
611	White	No	41.5369	Female	163	112.9	42.4931	Yes	240	5.8275	5.661	4.3845	3.663	2.997	3.9405	4.107	150.6	134.16	567.48	170.22				567.48	60							3.4965	90	39.0054	4.7175	8.991	7.659	6.438	10.5	114.12	83.34	44.64	4	648.517	82.4175			2.2015	A A
612	Black	No	57.592	Female	160	108.8	42.5	Yes	180	6.105	6.105	5.772	5.661	5.106	3.4965		40.26	276.78	333.36					333.36	60		12	15	56	26	18	1.887	90	10.9239	5.3835	6.105	5.439	4.329	13.26			12	4	475.358	0		26	3.17268	G A
613	Black	No	47.2616	Female	172	126.1	42.6244	Yes	60	4.107	3.9405	2.0535					22.8	20.64	39.24	28.14	20.64	23.16	19.68	39.24	60							1.6095	60	4.16176	7.2705	10.0455	12.3765	13.4865	120	258	420	552	4	1000.66	128.205	37.3	46	38.776	A A
614	White	Yes	47.6916	Male	182.8	144.5	43.243	Yes	240	6.327	5.8275	4.773	3.4965	3.108	4.4955	4.8285	28.2	162	174	132				174	60	30	15	12	26	25	21	2.886	90	7.92984	5.7165	7.1595	10.8225	9.7125	8.04	441.48	1145.4	2542.08	0	754.245	68.265	52	19	2.0427	G A
615	White	No	54.99	Male	180.6	141.4	43.3525	Yes	240	5.2725	5.217	4.1625	3.219	3.219	3.4965	3.885	29.52	61.86	96.42	92.76				96.42	60	9.9	21	30				1.7205	90	6.91752	4.44	7.1595	5.1615	7.8255	8.82	119.1	50.88		4	593.572	60.7725	7	67	1.74048	A A
616	Black	No	41.3095	Female	166.5	120.9	43.6112	Yes	240	5.4945	5.2725	5.0505	4.884	3.9405	3.996	3.996	36.24									6.8	22	20	24	36	22	2.22	90	8.84981	4.44	3.108	1.998	3.6075	17.16	359.7	76.38	99.9	4	298.035	0	7.7	14	3.38624	A A
617	White	No	42.19	Male	177.8	137.9	43.6215	Yes	240	6.6045	6.3825	4.7175	2.997	3.996	4.218	4.3845	22.62	43.8	53.04	47.82	33.78			53.04	60		33	29	80	52	43	2.9415	120	6.63972	5.55	9.3795	12.0435	6.1605	18.12	23.58	675.9	366.18	4	730.102	64.1025		19	4.4696	A A
618	White	No	48.7183	Female	164	118	43.8727	Yes	240	4.4955	4.3845	4.0515	3.1635	2.553	2.8305	3.33	13.92	10.62	9.48	14.34	13.5	2.7	5.4	14.34	90	9.1	76					3.6075	120	2.78122	5.3835	6.438	9.0465	7.104		115.56	254.94	222.06	4	622.71	0	9.7	23
619	White	No	66.7967	Male	170.7	128.19	43.9934	Yes	240	4.9395	4.8285	4.662	3.996	3.441	3.33	3.1635	85.14	86.58	199.26	116.04				199.26	60	12	29	46	85	57	48	2.7195	90	18.6911	4.44	7.8255	6.882	5.883	9.78	113.58	38.7	89.04	4	581.085	48.285	6.6	24	1.92992	G A
620	White	No	65.3649	Male	175.2	135.533	44.1548	Yes	240	5.1615	4.8285	4.107	3.1635	2.775	3.552	3.885	10.56	28.74	95.94	46.92	4.74	26.22	13.14	95.94	60							3.3855	240	2.42246	4.9395	9.657	8.325	8.214					4	735.098	142.358				A A
621	White	No	26.5467	Female	165	121.2	44.5179	Yes	240	5.55	5.3835	5.217	4.551	3.663	3.774	4.44	102	96	150	162	198	120	102	198	120							2.1645	90	25.16	5.2725	9.4905	7.881	5.55	25.74	451.56	387.9	139.2	1	648.518	15.8175			6.03174	G A
622	White	No	27.09	Female	170	128.8	44.5675	Yes	240	5.2725	5.1615	4.8285	3.8295	3.1635	3.1635	4.0515	35.46	63.84	45.84	115.5				115.5	90							4.0515	120	8.30946	4.4955	7.881	9.213	6.4935	9.54	138.84	255	62.58	4	636.862	97.4025			1.90609	A A
623	White	No	54.1885	Male	184.7	152.2	44.615	Yes	240	6.8265	6.993	7.1595	6.993	6.771	5.2725	4.329	72.9	55.74	90.3	83.04	158.34	215.34	57.06	215.34	180		19	19				2.442	90	22.1179	4.2735	6.438	5.883	6.1605	46.08	240.84	142.98	106.92	4	530.303	17.4825		35	8.75213	A A
624	White	No	59.2975	Male	188	157.9	44.6752	Yes	240	6.438	6.2715	5.6055	5.217	4.218	3.7185	4.218	15.6	12	66	21.6	16.8	21	18	66	60	23	16	18	16	22	16	3.2745	120	4.46368	4.1625	9.435	6.4935	6.8265	366	288	336	40.8	3	647.685	148.185	17	14	67.71	A A
625	White	No	63.8754	Female	167.4	125.3	44.7137	Yes	240	9.99	10.212	9.324	8.9355	7.992	6.8265	6.2715	121.08	143.7	149.16	175.44	344.7	183.66	110.88	344.7	120		27	25				3.441	120	53.7595	4.6065	5.7165	5.0505	4.218	28.38	278.1	161.16	120.24	4	442.89	0		50	5.81033
626	White	No	57.8602	Female	163.1	120.1	45.1476	Yes	240	4.995	4.9395	3.7185	2.7195	2.8305	3.4965	3.996	7.8	450.9	243.06	137.46	80.64	72.12	61.5	450.9	30		19	15	16	12	28	3.885	180	1.7316	5.439	7.881	8.0475	7.4925	32.94	342.12	281.16	259.38	4	663.503	10.8225		14	7.9627	G A
627	White	No	47.1358	Female	166.5	125.5	45.2705	Yes	240	4.6065	4.4955	4.4955	4.4955	4.4955	3.774	3.552	72	96	228	318	264	96	84	318	90		32	22	29			3.108	60	14.7408	5.3835	7.659	9.0465	4.8285	26.94	155.4	605.22	69.06	4	591.075	0		33	6.44584	G A
628	White	No	23.3926	Female	146	96.5	45.2712	Yes	120	4.4955	4.4955	4.218	3.996	3.7185			156.78		230.04				210.96			32	11	5	5	12	13	3.3855	240	31.3246	6.438	11.3775	14.5965	13.764	18.6	84.06	49.62	162.66	3	1069.76	297.202	22	11	5.32208	G A
629	White	No	49.8682	Female	169.5	131.4	45.7358	Yes	240	6.216	6.0495	5.8275	5.4945	5.439	5.106	3.4965	0.72	19.32	28.32	35.04	21.36	4.68	24.48	35.04	90	24	69	91	72	69	66	3.4965	180	0.198912	4.9395	6.549	7.659	6.6045	114	438	762	480	4	583.582	0	21	30	25.0268	A A
630	White	No	24.121	Male	169.5	132.1	45.9794	Yes	240	4.884	4.9395	3.9405	2.664	3.996	4.44	4.662	12	15	31.2	21	53.4	23.4	24	53.4	120	39	42	99		150	88	3.1635	120	2.6048	5.4945	7.4925	8.4915	8.2695	104.28	304.56	417.66	385.98	4	682.65	23.31	28	27	25.4652	A A
631	White	No	77.5594	Male	178	145.9	46.0485	Yes	240	6.2715	6.3825	5.7165	5.106	4.2735	3.441	3.885	16.92	21.9	46.08	47.4	74.82			74.82	120							2.775	120	4.71617	5.106	8.658	9.99	9.435	17.82	78.72	181.14	103.74	4	769.23	156.51			4.04395	A A
632	White	No	46.97	Female	165.7	127.9	46.5828	Yes	240	7.1595	6.6045	6.3825	5.6055	4.9395	3.9405	4.329	24.78	21.42	162.9					162.9	60		20	24	32	26	31	3.1635	180	7.885	5.439	5.772	6.105	6.105	12.36	33.54	39.06	37.92	4	529.47	0		15	2.98782	G A
633	White	No	72.2835	Female	160.02	120.2	46.9414	Yes	240	4.9395	4.8285	4.107	2.775	2.442	3.108	3.552	41.64	287.1	426.48					426.48	60							3.885	120	9.14137	4.44	6.6045	6.2715	4.8285	16.38	84	152.88	68.22	3	503.663	0			3.23232	G A
634	White	No	70.0138	Male	182	157.4	47.5184	Yes	240	5.661	5.328	5.217	5.1615	4.884	4.44	3.8295	7.56	27.84	17.16					27.84	30	7.7	23					3.33	90	1.9021	4.218	7.326	7.326	5.106	12.78	114.9	89.76	39	4	546.12	39.96		13	2.39582	A A
635	White	Yes	26.5523	Female	167.5	135.5	48.2958	Yes	240	4.8285	4.6065	3.996	3.3855	3.6075	4.218	4.1625	31.32	26.22	29.58	38.82	28.68	52.32	38.7	52.32	180	11	35	45	77			3.996	180	6.72127	4.884	6.3825	6.438	6.549	60.72	336.48	341.46	414.9	4	557.775	0	14	61	13.1803	A A
636	White	No	50.98	Female	164.6	131.7	48.6101	Yes	240	5.7165	5.6055	5.2725	4.995	4.3845	3.441	3.4965	42.48	53.64	214.26	149.1	24.72			214.26	60	9.7	12	12	16	23	18	2.775	180	10.7928	5.217	6.3825	7.4925	7.326	19.32	99.24	134.4	155.22	4	601.898	0	7.3	14	4.47966	G A
637	White	No	24.81	Female	164.5	133.5	49.3344	Yes	240	5.7165	5.55	5.2725	4.107	3.441	3.9405	4.2735	24.42	19.92	42.42	47.4	48.84			48.84	120		22	21	30	28	22	2.6085	180	6.20431	3.996	7.0485	6.216	9.1575	23.7	81.24	55.56	147.3	4	639.36	159.84		27	4.20912	G G
638	White	No	45.0358	Female	155.5	121.56	50.2724	Yes	240	4.4955	4.44	3.996	2.775	1.998	3.552	4.0515	4.56	3.66	2.16	11.46	47.22			47.22	120	11		21	13			2.664	180	0.911088	4.1625	6.66	5.994	5.8275	23.16	95.16	126.36	37.38	4	526.973	27.4725	12	46	4.2846	G A
639	White	No	29.1972	Female	167.1	140.6	50.3538	Yes	240	4.3845	4.329	2.6085	2.553	2.9415	3.2745	3.6075	17.04	91.08	50.22					91.08	30	32	21	21	23	29	20	3.1635	240	3.32053	6.0495	9.0465	10.3785	10.4895	9.78	22.08	50.1	76.98	4	832.5	106.56	19	20	2.62952	A A
640	Black	No	49.4139	Female	159.5	129.4	50.8643	Yes	60	5.328	5.0505	2.997					24	29.76	108.06	59.64	54.48	29.64	15.48	108.06	60	6	24	18	51	37	27			5.6832									4
641	Black	No	40.97	Female	160	132.3	51.6797	Yes	60	4.8285	4.7175	3.2745					30	35.4	66	45	41.4	26.4	15	66	60	22	24	17	14					6.438									N/A
642	White	No	45.252	Female	178	166	52.3924	Yes	240	6.6045	6.3825	5.55	4.4955	3.8295	4.1625	3.7185	66	408	228	174	78	48.6	55.8	408	30		31	21	36	47	42	4.0515	180	19.3732	4.6065	6.8265	6.327	7.4925	43.38	490.08	284.76	312.18	4	593.572	40.7925		17	8.88133	G A
643	unknown or not reported	Yes	31.4228	Male	167	151.3	54.2508	Yes	240	5.106	5.106	4.995	4.4955	3.552	3.996	4.218	78	252	666	240				666	60	13		15				4.44	120	17.7008	5.7165	7.1595	10.8225	9.7125	9.12	79.8	139.86	81.6	4	754.245	68.265	9.5	30	2.31709
644	White	No	65.8248	Male	184	209	61.732	Yes	240	5.1615	4.773	4.9395	4.7175	4.4955	3.2745	2.9415	33.66	22.68	32.16	40.62	35.28	34.98	19.86	40.62	90							3.9405	240	7.7216	4.8285	6.3825	7.104	7.3815	178.02		675.36		4	591.908	12.4875			38.2031
645	White	No	45.8189	Female	158.7	156.3	62.0591	Yes	240	4.4955	4.551	4.662	4.551	4.329	4.0515	4.1625	37.5	33.78	20.64	25.5	52.56			52.56	120		16	20				2.2755	120	7.4925	4.107	4.6065	3.7185	4.662	22.56	362.1	156.06	204.48	4	395.438	0		17	4.11795	A A
646	White	No	33.7721	Female	158.1	159.4	63.7712	Yes	240	5.6055	4.995	4.6065	3.9405	3.4965	3.219	3.7185	49.86	130.5	252.24					252.24	60							2.664	120	12.4218	3.1635	5.217	5.6055	4.8285	22.02	370.32	217.92	53.04	4	432.9	53.28			3.09601
647	White	No	54.1777	Male	167.8	181.2	64.3538	No	0								68.16			162.6						7.8	37	34				3.8295	120		3.885	7.6035	6.327	6.0495	12.6	192	306	186	4	562.77	96.57	12	36	2.1756
648	Black	No	26.9629	Male	177.5	208.2	66.0821	Yes	240	4.773	4.773	4.6065	4.218	3.7185	3.774	4.0515	42.6	37.2	306	168				306	60		36	38	76	97	58	2.8305	240	9.03688	5.0505	8.3805	7.437	7.77	9.78	159.48	132.6	164.4	4	671.827	65.7675	4.6	30	2.19528
649	White	No	57.2744	Female	155.8	174	71.6827	Yes	240	5.3835	4.8285	3.885	2.775	3.552	4.218	4.4955	30.18	55.5	258.3	103.08				258.3	60				10	25	27	3.2745	120	7.22107	4.2735	6.6045	5.6055	4.884	9.24	185.88	157.2	76.92	4	492.84	0		17	1.75498
650	White	No	64.12	Male		108.6		Yes	240	5.661	5.9385	5.6055	5.439	4.551	3.33	4.9395	24.36	77.7	131.58	99.54	81.54	61.38	82.14	131.58	60							2.7195	90	6.12898	4.8285	8.547	8.6025	6.771	30.18	253.68	187.2	66.18	0	661.005	81.585			6.47663
651	Black	No	47.9243	Male				No	0	3.774							45.84	102.24	227.16	159.54	148.8	67.5	61.56	227.16	60	28	14	12	12	13	11	3.3855	240	7.6889	7.104	9.879	12.099	13.653	25.2	78	84	132	4	994.005	141.525	19	11	7.95648
652	White	No	63.6236	Male				No	0								234.48	160.56	160.74	221.58	465.12	526.5		526.5	180		12		22	14	19	2.7195	120		4.6065	7.104	7.326	5.7165	22.32	201	240.66	329.52	4	563.602	10.8225		13	4.56965
653	White	No	38.7495	Male				No	0								8.28	25.38	86.34	26.28		16.56	18.36			34	31	35	48	91	70	4.0515	240		5.328	10.9335	13.32	4.995	276	960	2064	756	4	757.575	118.215	120	34	65.3568
654	Black	No	56.9622	Female				Yes	180	4.9395	5.0505	4.662	3.996	3.6075	3.8295		45.96	108.18	136.26	67.62		45	44.64				51	52	85			3.9405	240	10.0898	5.0505	7.881	8.991	9.324	48.96	147.9	232.02	185.94	4	726.773	120.712		42	10.9899	A A
655	White	No	24.3784	Female				Yes	240	3.774	3.996	3.4965	2.2755	2.775	3.552	3.9405	32.1	30.54	55.5	66.9	43.74	123.66	30.24	123.66	180	33	13	10	14	13	13	1.9425	90	5.38424	6.0495	9.2685	11.766	10.656	66	234	336	426	4	864.967	139.027	27	20	17.7452
656	White	No	44.32	Female				Yes	240	5.106	4.9395	4.773	3.3855	2.8305	3.3855	4.3845	54.24										12	17				2.4975	120	12.3089	4.773	6.9375	6.0495	4.773	15.96	116.28	95.28	15.9	4	513.652	0		20	3.38565
657	Black	Yes	41.67	Female				No	0								22.2	15.66	34.8	86.16	35.46			86.16	90		24	18	29		19	2.109	90		5.661	10.656	13.209	6.993	17.7	98.88	176.16	106.08	4	812.52	133.2		19	4.45332
658	White	No	65.4168	Female				No	0								52.5	59.28	324.18	191.46	89.28	53.04	40.08	324.18	60		30	27	28	22	25	3.219	180		5.1615	7.7145	6.7155	7.0485	56.04	440.16	385.68	499.26	4	621.045	1.665		23	12.8556
659	White	No	35.6285	Female				No	0								21.96	30.3	80.1	88.14	25.56	22.92	27.6	88.14	90		34	30	37	29	65	3.219	120		4.662	6.216	6.327	5.883	102.66	698.88	521.94	493.38	4	527.805	0		28	21.2712
660	White	No	29.1204	Female				No	0								43.32	42.78	106.44					106.44	60		26	25				3.6075	240		4.218	7.2705	8.3805	6.9375	15.06	394.2	391.08	435.36	4	615.217	109.058		21	2.82325
661	White	No	56.9018	Male				Yes	240	11.5995	11.655	11.1555	10.2675	9.8235	8.3805	8.2695	6	8.88	13.08	27.6	3.6	24	84.96	84.96	240	12	27	17	15	15	15	2.9415	60	3.0932	4.6065	5.994	5.55	5.9385	30.84	321.66	247.8	244.32	4	510.322	0	10	26	6.31398
662	White	No	22.52	Male				Yes	240	5.106	4.9395	5.0505	4.9395	4.551	4.218	4.107	39.12	55.98	33.96	52.38	112.56	26.94	35.82	112.56	120	17	23	19		30	24	2.8305	90	8.87763	5.439	10.101	9.0465	4.884	56.4	486	702	168	4	666.832	14.1525	17	25	13.6338	A A
663	White	No	71.0131	Male				Yes	240	7.104	6.3825	6.105	5.7165	4.8285	4.1625	4.4955	12.96	20.64	92.34	75.6				92.34	60				13	11		2.664	120	4.0919	4.7175	6.771	5.661	5.106	7.8	37.5	87.36	37.62	4	511.988	0			1.6354
[truncated: 45 more columns]

## Sheet: CAMP-MGH Data
De-identified #	Days Between CAMP and SUGARMGH	CAMP_glucose_baseline (mmol/L)	CAMP_glucose_30min (mmol/L)	CAMP_glucose_120min (mmol/L)	CAMP_glucose_AUC	CAMP_insulin_baseline (pmol/L)	CAMP_insulin_30min (pmol/L)	CAMP_insulin_120min (pmol/L)	CAMP_Matsuda	SUGAR-MGH_Matsuda	SUGARMGH_v2_glucose_baseline (mmol/L)	SUGARMGH_v2_glucose_30min (mmol/L)	SUGARMGH_v2_glucose_120min (mmol/L)	SUGARMGH_v2_insulin_baseline (pmol/L)	SUGARMGH_v2_insulin_30mins (pmol/L)	SUGARMGH_v2_insulin_120mins (pmol/L)
664	-934	4.72222	8.38889	5.11111	804.167	13.92	102.48				4.88889	6.94444	4.88889	11.16
665	-906	5.66667	6.88889	5.83333	760.833	136.2	1183.2				5.16667	7.88889	7.61111	35.46
666	-1238	6	9.88889	8.05556	1045.83	96	300	390			5.44444	7.77778	8.61111	50.46	223.92
667	-6	7.22222	8.94444	3.88889	820	82.44	222.84	38.22	14.8128	59.791	4.83333	8.66667	2.88889	22.2	115.62	5.34
668	-27	5.05556	8.05556	4.11111	744.167	23.22	286.56	114.48	32.3925	48.4535	4.72222	6.88889	3.44444	21.24	223.08	9.54
669	-992	4.44444	7.72222	4.88889	750	58.8	306	402	16.2274	48.178	4.27778	6.66667	5.72222	23.58	187.38	19.68
670	-21	6.05556	9.77778	5.5	925	21.24	118.08	110.16	36.2593	25.4856	4.88889	5.83333	9.33333	83.88	50.52	34.08
671	-21	5.94444	11	11.7222	1276.67	132.9	530.76	1649.4	4.14497	25.4856	4.88889	5.83333	9.33333	83.88	50.52	34.08
672	-204	5.33333	7.83333	3.61111	712.5	28.2	210.3	94.2	32.7419	133.19	4.72222	6.77778	5.11111	7.8	37.5	37.62
673	-84	5.61111	6.55556	3.61111	640	10.8	116.04	35.88	76.0574	77.4853	4.22222	7.33333	5.11111	12.78	114.9	39
674	-572	4.72222	8.38889	5	799.167	11.4	210.6				4.44444	9	5.5	8.58	163.86	41.16
675	-45	5.77778	6.77778	4.55556	698.333	28.38	218.94	21	34.5755	33.5474	4.94444	7.77778	4.38889	26.16	285.36	49.8
676	-26	5.33333	6.61111	5.22222	711.667	28.32	313.32	141.78	26.796	124.381	4.33333	4.66667	5.38889	10.68	22.02	54.66
677	-60	4.88889	6.88889	3.72222	654.167	26.4	234	48	38.1937	66.0918	4.72222	8.44444	5.5	9.6	166.92	66.96
678	-440	5.83333	7.61111	5.61111	796.667	69.18	480.24	254.1	12.0688	37.1277	5.38889	7.66667	4.83333	26.94	155.4	69.06
679	-11	4.77778	4.88889	5.16667	597.5	29.04	491.4	142.44	25.6846	64.7423	4	6.16667	5	18.24	106.14	69.66
680	-420	5.27778	6.94444	4.66667	705.833	43.62	168.6	157.56	25.0196	128.772	4.38889	6.38889	6.94444	5.46	46.68	75.66
681	-9	5.61111	9.61111	7.5	998.333	18.6	138	132	36.2633	67.5647	4.88889	7.27778	6.11111	11.82	98.52	76.32
682	-8	4.83333	7.72222	4.77778	750.833	15.72	178.92	151.56	44.4291	72.8345	4.27778	6.61111	4.88889	9.24	185.88	76.92
683	-574	4.5	8.77778	3.16667	736.667	19.8	282	44.4	42.122	141.534	4.55556	5.16667	5.16667	7.5	2.4	78.42
684	-860	5.55556	9.05556	7	941.667	35.22	120.42				5.05556	7.05556	7.33333	11.34	115.26	83.52
685	-246	5.11111	8.05556	5.61111	812.5	28.8	312	168	25.2972	73.2535	4.44444	7.83333	5.88889	9.78	113.58	89.04
686	-69	4.55556	8.33333	5.88889	833.333	18.6	165.18	126.42	42.7023	72.2496	4.44444	5.83333	6.11111	12.12	87.72	95.46
687	-1158	7.11111	9.83333	9	1101.67	56.4	216	246			5.77778	6.88889	7.61111	32.28		96.78
688	-86	5.88889	10.2222	8.27778	1074.17	71.22	223.02	217.02	13.1186	16.688	6.22222	11.2222	13	61.2	100.92	116.64
689	-29	5.16667	9.83333	2.38889	775	24.24	229.02	21.3	38.7967	54.5194	4.5	8.5	5.61111	13.02	132.42	132.24
690	-254	4.94444	7.66667	3.94444	711.667	26.34	144.84				4.44444	7.16667	7.05556	8.58	71.16	134.34
691	-54	6	7.38889	8.72222	925.833	81	188.82	645.6	9.56506	25.669	5.33333	5.55556	9.05556	45.42	100.68	136.62
692	-715	6.27778	11.6667	5.94444	1061.67	113.16	337.98	175.38	9.20039	43.1415	4	7.05556	9.16667	23.7	81.24	147.3
693	-56	4.44444	6.55556	3.61111	622.5	17.04	239.7	95.64	48.043	71.5066	4.66667	7.66667	7.77778	6.6	124.5	153.06
694	-60	4.72222	7.05556	3.55556	654.167	25.74	184.44	67.08	41.7332	44.9203	4.38889	5.27778	6.5	17.28	186.36	160.14
695	-137	5.05556	9.66667	5.5	903.333	11.58	232.2	147.84	44.0591	31.972	5.5	6.88889	7.55556	29.1	83.88	162.84
696	-328	4.38889	9.11111	7.22222	937.5	21.54	392.16	241.68	26.4762	45.299	4.44444	5.66667	8.83333	18.48	83.4	180
697	-2	4.94444	7.55556	6.05556	800	49.92	464.16	214.92	16.4182	32.5442	4.22222	6.22222	6.61111	25.38	258.54	181.02
698	-510	7.38889	11.8889	10.5	1296.67	80.16	273.48				5.55556	7.72222	7.22222	23.7	125.16	182.34
699	-869	7.11111	9.5	7.11111	996.667	72.9	225.12	269.4	11.3569	10.5444	6.44444	11.0556	7.66667	62.1	549.3	192.3
700	-108	4.88889	7.55556	4.33333	721.667	49.2	504	210	17.0941	24.967	5.16667	6.94444	6.83333	40.92	126	193.56
701	-46	5.33333	7.88889	5.44444	798.333	55.14	651.6	350.22	12.4545	19.2805	4.44444	6.44444	4.83333	43.8	540.12	207.12
702	-25	5.05556	7.27778	4.83333	730	77.64	973.8	325.08	9.85053	23.3733	4.05556	6	5.05556	46.5	307.2	224.4
703	-308	4.72222	6.27778	4.38889	645	111.84	655.2	214.32	10.6226	32.6318	3.77778	5.11111	5.27778	35.34	180.96	230.58
704	-685	5.83333	12.2778	14.5	1476.67	64.98	233.4	720	8.45542	18.1837	6.44444	11	17.8333	31.8	102.12	242.58
705	-56	4.72222	7.27778	5.22222	742.5	80.94	709.2	216.36	11.6551	10.8242	5.66667	7.88889	8.61111	96.72	284.7	250.86
706	-261	5.83333	8.16667	6.61111	875	109.98	871.2	567.54	6.62932	8.12863	5.05556	7.94444	6.94444	119.34	760.02	252.6
707	-30	5.5	7.83333	4.66667	762.5	56.52	1449	119.28	9.94953	32.1958	4.5	3.94444	5.83333	27.48	182.1	282.18
708	-102	5.44444	7.38889	4.83333	742.5	71.88	558.48	549.24	10.505	15.7237	4.88889	7.5	6.94444	62.82	242.58	307.68
709	-432	5.38889	9.44444	9.16667	1060	45.36	758.4	1303.8	8.53178	14.0548	4.77778	7.77778	7.61111	45.6	633	358.38
710	-49	4.77778	10.2222	7.27778	1012.5	185.04	1827.6	835.2	4.00573	11.8015	4.33333	7.33333	5.88889	79.02	627.96	367.98
711	-369	5.05556	8.16667	6.61111	863.333	167.04	2355.6	1205.4	3.79654	24.8771	4.72222	6.83333	6.77778	21.36	372.06	393
712	-966	5.5	9.22222	7.16667	958.333	61.8	658.2				4.77778	7.44444	6.44444	41.58	303.24	414.18
713	-787	6.27778	9.44444	9.11111	1070.83	84	234	420	9.65013	12.4236	5.83333	8.5	12.3333	52.74	216.78	441.24
714	-171	5.61111	8.55556	4.83333	815	54	264	528	13.5937	19.0686	4.77778	6.16667	6.66667	45.48	132.84	468.48
715	-717	6.33333	9	8.94444	1037.5	114.48	538.92				5.22222	7.16667	6.94444	35.22	339.36	487.5
716	-153	6.27778	9.77778	3.33333	830.833	146.82	651	154.38	7.27252	12.5125	5.16667	7.72222	7.05556	56.04	440.16	499.26
717	-20	6.38889	11.5556	7	1104.17	128.88	533.52	712.2	5.646	11.0886	5.44444	8.83333	9.44444	68.82	255	499.68
718	-362	4.88889	8.88889	10.1111	1061.67	17.76	272.04				4.66667	7.38889	8.88889	18.9	156.6	541.8
719	-106	5.38889	8.33333	6.66667	880.833	88.98	469.86	734.4	8.43702	9.78726	5.22222	7.66667	9.94444	83.94	300.48	554.28
720	-49	5.22222	10.1667	8.83333	1085.83	136.2	1083.6	972.6	4.88133	11.0728	5.05556	5.72222	7.72222	109.5	50.58	556.68
721	-830	6.05556	11.6667	9.16667	1203.33	83.22	447.9	714			5.27778	7.5	11.6667		202.02	647.64
722	-1030	5.38889	9.72222	5.72222	921.667	68.82	567.24				4.55556	6.88889	7.61111	41.1	418.5	661.92
723	-112	4.66667	8.94444	5.83333	869.167	144	954	894	5.88023	10.7666	4.27778	5.72222	5.88889	87.72	530.28	684.18
724	-448	6.61111	9.83333	12.2778	1241.67	344.52	724.2	1694.4	2.23135	3.61253	6.16667	10	10.2222	254.28	700.32	712.02
725	-447	6.55556	9.16667	4.5	850.833	184.26	763.8	401.28	5.22548	8.01136	5.72222	8.94444	9.44444	74.58	511.2	777
726	-265	7	13.3333	10.3889	1372.5	94.68	601.8	548.58	5.95829	8.62952	5.66667	8.66667	6.16667	60.24	669.9	996.9
727	-345	6.66667	11.1111	13.2222	1361.67	194.88	678.6				5.66667	8.11111	9.38889	55.74	270.24	1011.12
